# Supplementary material
Source: PubMed Central journal article supplement (PMC3173771)
Supplement: NIHMS322281-supplement-SI.pdf [file NIHMS322281-supplement-SI.pdf]

Supplementary Information

## **Enamine/Carbene Cascade Catalysis in the Diastereo- and Enantioselective Synthesis of Functionalized Cyclopentanones**

Kerem E. Ozboya and Tomislav Rovis\*

Department of Chemistry, Colorado State University, Fort Collins, CO USA 80523

[rovis@lamar.colostate.edu](mailto:rovis@lamar.colostate.edu)

Contents:

|                                                                      |     |
|----------------------------------------------------------------------|-----|
| 1. Materials and Methods.....                                        | S1  |
| 2. Representative Procedures and Characterization                    |     |
| Data.....                                                            | S3  |
| 3. <sup>1</sup> H and <sup>13</sup> C Spectra for New Compounds..... | S14 |
| 4. GC Traces for New Compounds.....                                  | S33 |
| 5. Crystal Structure and Data of <b>9</b> .....                      | S51 |
| 6. NMR Experiments.....                                              | S59 |
| 7. Crossover Experiments.....                                        | S62 |

## **Materials and Methods**

All reactions were carried out under an atmosphere of argon with magnetic stirring. HPLC grade Chloroform preserved with pentane was purchased from Fisher Scientific. Column chromatography was performed on SiliCycle®SilicaFlash® P60, 40-63 $\mu$ m 60A. Thin layer chromatography was performed on SiliCycle® 250 $\mu$ m 60A plates. Visualization was accomplished with UV light or p-anisaldehyde stain followed by heating. This stain is highly recommended, with starting material typically staining orange, intermediate as brown, and final product as a dark blue.

<sup>1</sup>H NMR spectra were obtained on Varian 300 or 400 MHz spectrometers at ambient temperature. Data is reported as follows: chemical shift in parts per million ( $\delta$ , ppm) from CDCl<sub>3</sub> (7.26 ppm), toluene-d<sub>8</sub> (7.09, 7.0, 6.98, 2.09 ppm) or benzene-d<sub>6</sub> (7.16 ppm) multiplicity (s = singlet, bs = broad singlet, d = doublet, t = triplet, q = quartet, and m = multiplet), coupling constants(Hz).

<sup>13</sup>C NMR was recorded on Varian 300 or 400 MHz spectrometers (at 75 or 100 MHz) at ambient temperature. Chemical shifts are reported in ppm from CDCl<sub>3</sub> (77.2 ppm) or toluene-d<sub>8</sub> (137.86 (1), 129.4 (3), 128.33 (3), 125.49 (3), 20.4 (5) ppm).

Varian CP-3800 Gas Chromatograph was used to determine diastereomeric and enantiomeric ratios. For the achiral column, Varian CP-Sil 8CB (15m X 0.25mm) was used. For the chiral column, Chiraldex BDM-1 was used, unless otherwise stated.

Aldehydes **1a-f** were purchased from Aldrich. Aldehyde **1g** was prepared according to literature procedure.<sup>1</sup>

---

<sup>1</sup> Y. Kiyotsuka and Y. Kobayashi, *J. Org. Chem.*, 2009, **74**, 7489.

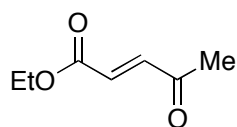**2a**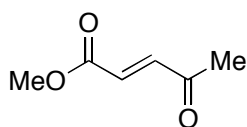**2h**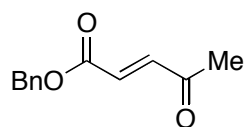**2i**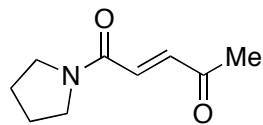**2j**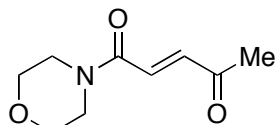**2k**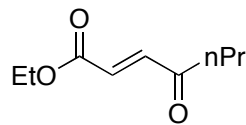**2l**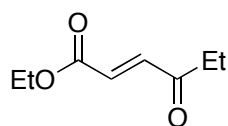**2m**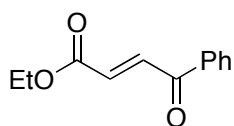**2n**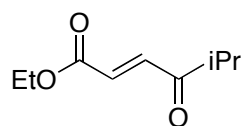**2o**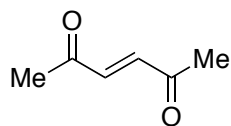**2p**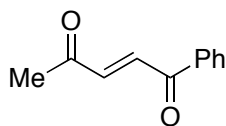**2q**

Keto-esters **2** were prepared with the following protocols:

**2a**,<sup>2</sup> **2h**,<sup>3</sup> **2i**,<sup>4</sup> **2j-k**,<sup>5</sup> **2l-p**,<sup>2</sup> and **2q**.<sup>6</sup>

Amine catalyst **3** was prepared with the established protocol.<sup>7</sup>

Triazolium catalyst **5** and **6** were prepared according to literature procedure.<sup>8</sup>

<sup>2</sup> K. A. Runcie and R. J. K. Taylor, *Chem. Commun.*, 2002, 974.

<sup>3</sup> P. F. Schuda, C. B. Ebner and S. J. Potlock, *Synthesis*, 1987, 1055.

<sup>4</sup> S. Gérard, M. Raoul and J. Sapi, *Eur. J. Org. Chem.*, 2006, 2440.

<sup>5</sup> J. L. Zigterman, J. C. S. Woo, S. D. Walker, J. S. Tedrow, C. J. Borths, E. E. Bunel and M. M. Faul, *J. Org. Chem.*, 2007, **72**, 8870.

<sup>6</sup> J.-Q. Yu and E. J. Corey, *J. Am. Chem. Soc.*, 2003, **125**, 3232.

<sup>7</sup> M. Marigo, T. C. Wabnitz, D. Fielenbach and K. A. Jørgensen, *Angew. Chem. Int. Ed.*, 2005, **44**, 794.

<sup>8</sup> H. U. Vora, S. P. Lathrop, N. T. Reynolds, M. S. Kerr, J. Read de Alaniz and T. Rovis, *Org. Synth.*, 2010, **87**, 350.

## Representative Procedures

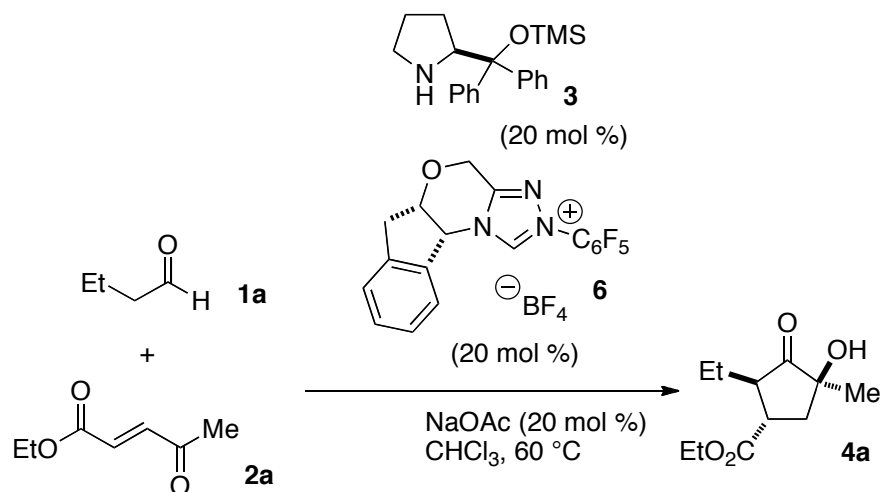

### General procedure for synthesis of **4a**:

25 mg (0.17 mmol) of Keto-Ester **2a** is added to an oven-dried 10mL round bottom flask. 11mg (0.2 equiv., 0.03 mmol) of amine catalyst **3** and 14 mg (0.2 equiv., 0.03 mmol) of triazolium **6** are then added. 1 ml of CHCl<sub>3</sub> is added and argon is bubbled into the mixture. 20  $\mu$ l (1.2-1.5 equiv, 0.2 mmol) of butyraldehyde (**1a**) is then added, followed by 2.5mg (0.2 equiv, 0.03 mmol) of NaOAc. The reaction is outfitted with a reflux condenser and stir bar, and heated to 60 °C for 12 hours. The reaction is cooled to room temperature and filtered through a small plug (1 in) of silica gel, washing with DCM and EtOAc. The solution is concentrated and purified by column chromatography, eluting with 10% EtOAc/DCM to 50% EtOAc/Hexanes through silica gel. Fractions were collected and concentrated to provide the desired product.

## Characterization Data

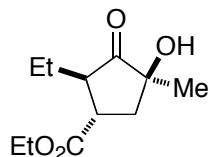

### (1S,2R,4S)-ethyl 2-ethyl-4-hydroxy-4-methyl-3-oxocyclopentanecarboxylate (4a)

Rf= 0.3 (10% Ethyl Acetate/Dichloromethane); 28 mg (72%), 94% ee, 19:1:<1:<1 dr  $[\alpha]_D^{21} = -40.83$  (c = 0.0024 g/ml, CHCl<sub>3</sub>) **GC Analysis** CP-Sil 8CB column at 110 °C, 1 ml/min. Major: 12.07min. Minor: 12.95 min, 13.84 min, 15.14 min. BDM-1 column at 130 °C, 1 ml/min. Major: 24.35 min. Minor: 23.81 min. **<sup>1</sup>H NMR:** (300 MHz; CDCl<sub>3</sub>):  $\delta_H$  4.16-4.23 (2 H, q), 2.98 (1 H, d, *J* 7.2), 2.33 (1 H, ddd, *J*=13.7, 7.2 and 0.3), 1.94 (1 H, d, *J*=10.5), 1.63 (1 H, d, *J*=7.3), 1.33 (3 H, d, *J*=0.8), 1.25-1.33 (3 H, t, *J* = 7.2 ), 0.92 (3 H, td, *J*=7.5 and 0.8). **<sup>13</sup>C NMR:** (100 MHz, CDCl<sub>3</sub>)  $\delta$  216.7, 174.8, 75.7, 60.9, 51.7, 42.3, 39.3, 23.0, 22.1, 14.1, 10.8. **IR** (NaCl, neat): 3465, 2971, 2937, 2878, 1733, 1519, 1447, 1378, 1298, 1234, 1177. **HRMS:** (ESI-) calcd for C<sub>12</sub>H<sub>20</sub>O<sub>4</sub>, 227.1289. Found 227.1291.

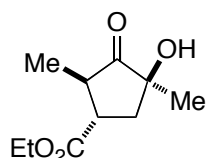

### (1S,2R,4S)-ethyl 4-hydroxy-2,4-dimethyl-3-oxocyclopentanecarboxylate (4b)

Rf= 0.3 (10% Ethyl Acetate/Dichloromethane); 28 mg (78%), 88% ee, 24:1.5:1 dr  $[\alpha]_D^{21} = -101.82$  (c = 0.0011 g/ml, CHCl<sub>3</sub>) **GC Analysis** CP-Sil 8CB column at 110 °C, 1 ml/min. Major: 7.54min. Minor: 8.22, 9.46 min. BDM-1 column at 130 °C, 1 ml/min. Major: 17.33 min. Minor: 16.82 min. **<sup>1</sup>H NMR:** (300 MHz, CDCl<sub>3</sub>)  $\delta$  4.20 (q, 2H), 2.84 (q, 1H), 2.61 (m, 1H), 2.34 (dd, 1H), 1.94 (t, 1H), 1.35 (s, 3H), 1.29 (s, 3H), 1.24 (t, 3H). **<sup>13</sup>C NMR:** (100 MHz, CDCl<sub>3</sub>)  $\delta$  217.4, 174.5, 61.2, 46.07, 45.4, 39.3, 23.5, 14.4, 13.9. **IR** (NaCl, neat): 3436, 2980, 2938, 1732, 1520, 1450, 1376, 1181. **HRMS:** (ESI-) calcd for C<sub>11</sub>H<sub>26</sub>O<sub>4</sub>, 213.1249. Found 213.1256.

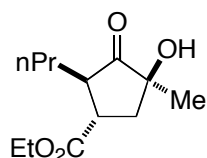

### (1S,2R,4S)-ethyl 4-hydroxy-4-methyl-3-oxo-2-propylcyclopentanecarboxylate(4c)

Rf= 0.3 (10% Ethyl Acetate/Dichloromethane); 31 mg (76%), 95% ee, 33:1:1 dr  $[\alpha]_D^{21} = -56.97$  (c = 0.0033 g/ml, CHCl<sub>3</sub>) **GC Analysis** CP-Sil 8CB column at 110 °C, 1 ml/min. Major: 19.66min. Minor: 20.77, 22.00 min. BDM-1 column at 100 °C, 2 ml/min. Major: 112.04 min. Minor: 113.74 min. **<sup>1</sup>H NMR:** (300 MHz, CDCl<sub>3</sub>)  $\delta$  4.20 (q, 2H), 2.95 (q, 1H), 2.66 (m, 1H), 2.33 (dd, 1H), 1.92 (m, 1H), 1.72 (m, 1H), 1.49 (m, 1H), 1.33 (s, 3H), 1.28 (t, 3H), 0.90 (t, 3H). **<sup>13</sup>C NMR:** (100 MHz, CDCl<sub>3</sub>)  $\delta$  217.3, 175.1, 61.2, 50.2, 43.4,

39.7, 31.9, 23.2, 20.1, 14.4, 14.2. **IR** (NaCl, neat): 3448, 2964, 1734, 1377, 1178, 1038, 756  $\text{cm}^{-1}$ . **HRMS**: (ESI-) calcd for  $\text{C}_{12}\text{H}_{20}\text{O}_4$ , 227.1289. Found 227.1291.

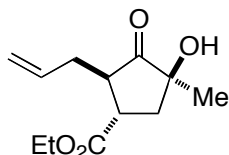

**(1S,2R,4S)-ethyl 2-allyl-4-hydroxy-4-methyl-3-oxocyclopentanecarboxylate (4e)**

R<sub>f</sub> = 0.39 (10% Ethyl Acetate/Dichloromethane); 37 mg (97%), 85% ee, 15:1:0.2:0.2 dr,  $[\alpha]_{\text{D}}^{21} = -67.23$  (c = 0.0047 g/ml,  $\text{CHCl}_3$ ) **GC Analysis**: CP-Sil 8CB at 110 °C, 1 ml/min. Major 16.70 min. Minor: 18.16 min, 20.74 min, 21.11 min. **HPLC Analysis**: ChiralPak IA column at 97% Hexanes/iPrOH, 1 ml/min. Major: 14.346 min. Minor: 12.338 min. **<sup>1</sup>H NMR**: (300 MHz,  $\text{CDCl}_3$ ):  $\delta$  5.73-5.61 (m, 1H), 5.12-5.00 (m, 2H), 4.20-4.13 (m, 2H), 2.98 (td, *J* = 10.3, 7.2 Hz, 1H), 2.77 (ddd, *J* = 10.2, 7.3, 4.8 Hz, 1H), 2.56-2.50 (m, 1H), 2.33 (dtd, *J* = 13.6, 6.8, 1.9 Hz, 2H), 1.91 (ddd, *J* = 13.7, 10.4, 0.4 Hz, 1H), 1.33 (d, *J* = 0.7 Hz, 3H), 1.33-1.24 (m, 3H). **<sup>13</sup>C NMR**: (100 MHz,  $\text{CDCl}_3$ ):  $\delta$  216.0, 174.5, 134.3, 117.7, 75.6, 60.9, 49.9, 42.2, 39.3, 33.4, 23.0, 14.1 **IR** (NaCl, neat): 3457, 2979, 2930, 1734, 1641, 1520, 1444, 1378, 1227, 1179  $\text{cm}^{-1}$ . **HRMS**: (APCI+) Calc'd for  $\text{C}_{12}\text{H}_{18}\text{O}_4$ , 227.1278. Found 227.1276.

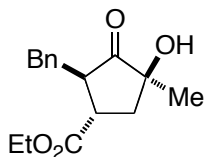

**(1S,2R,4S)-ethyl 2-benzyl-4-hydroxy-4-methyl-3-oxocyclopentanecarboxylate (4f)**

R<sub>f</sub> = 0.21 (5% Ethyl Acetate/Dichloromethane); 25 mg (50%), 89% ee, 9:1:0.2:0.2 dr,  $[\alpha]_{\text{D}}^{21} = -126.92$  (c = 0.0013 g/ml,  $\text{CHCl}_3$ ) **HPLC Analysis** Chiracel IC at 95% Hexanes/iPrOH. Major 13.36 min. Minor: 11.36 min **<sup>1</sup>H-NMR** (300 MHz;  $\text{CDCl}_3$ ):  $\delta$  7.32-7.14 (m, 5H), 3.98-3.83 (m, 2H), 3.19 (dd, *J* = 13.7, 4.5 Hz, 1H), 3.04-2.89 (m, 2H), 2.81 (dd, *J* = 13.7, 7.2 Hz, 1H), 2.30-2.23 (m, 1H), 1.91-1.83 (m, 2H), 1.33 (s, 3H), 1.15-1.11 (t, *J* = 7.0 Hz, 3H). **<sup>13</sup>C NMR**: (100 MHz,  $\text{CDCl}_3$ ):  $\delta$  215.9, 174.6, 138.3, 129.55, 128.55, 126.72, 75.8, 61.1, 52.5, 42.8, 39.7, 35.4, 23.1, 14.2. **IR** (NaCl, neat): 3442, 2980, 1732, 1496, 1454, 1377, 1178, 1045. **HRMS**: (APCI+) Calc'd for  $\text{C}_{16}\text{H}_{19}\text{O}_4$ , 275.1289. Found 275.1292.

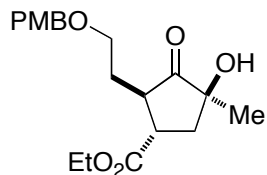

**(1S,2R,4S)-ethyl 4-hydroxy-2-(2-((4-methoxybenzyl)oxy)ethyl)-4-methyl-3-oxocyclopentanecarboxylate (4g)**

R<sub>f</sub> = 0.31 (5% Ethyl Acetate/Dichloromethane); 37mg (59%), 90% ee, 9:1:0.2:0.2 dr,

$[\alpha]_D^{21} = -42.61$  ( $c = 0.0023$  g/ml,  $\text{CHCl}_3$ ) **HPLC Analysis** Chiracel IC at 95% Hexanes/iProH. Major 13.64 min. Minor: 16.34 min  **$^1\text{H-NMR}$**  (300 MHz;  $\text{CDCl}_3$ ):  $\delta$  7.23 (d,  $J = 8.5$  Hz, 2H), 6.86 (d,  $J = 8.7$  Hz, 2H), 4.36 (d,  $J = 4.0$  Hz, 2H), 4.13 (dd,  $J = 11.6, 7.1$  Hz, 3H), 3.80 (s, 3H), 3.55 (td,  $J = 4.8, 2.1$  Hz, 2H), 3.09 (d,  $J = 7.2$  Hz, 1H), 2.78 (s, 1H), 2.38-2.34 (m, 1H), 2.04 (d,  $J = 5.4$  Hz, 3H), 1.88 (dd,  $J = 13.7, 10.6$  Hz, 2H), 1.31 (s, 3H), 1.23 (t,  $J = 7.1$  Hz, 3H).  **$^{13}\text{C NMR}$** : (100 MHz,  $\text{CDCl}_3$ ):  $\delta$  216.5, 191.3, 180.5, 174.5, 159.1, 130.0, 129.2, 113.8, 113.7, 72.4, 67.1, 60.9, 55.2, 47.7, 42.7, 39.8, 29.0, 22.7, 14.1 **IR** (NaCl, neat): 3445, 2936, 1730, 1611, 1514, 1444, 1376, 1301, 1247, 1174. **HRMS**: (ESI-) Calc'd for  $\text{C}_{19}\text{H}_{25}\text{O}_6$ , 349.1657. Found 349.1663.

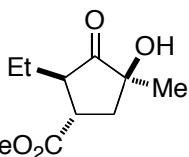

**(1S,2R,4S)-methyl 2-ethyl-4-hydroxy-4-methyl-3-oxocyclopentanecarboxylate (4h)**  
 Rf= 0.24 (10% Ethyl Acetate/Dichloromethane); 38 mg (97%), 89% ee, 33:1:1:nd dr  
 $[\alpha]_D^{21} = -62.32$  ( $c = 0.0043$  g/ml,  $\text{CHCl}_3$ ) **GC Analysis** CP-Sil 8CB column at 110 °C, 1 ml/min. Major: 8.33 min. Minor: 8.98, 9.51 min. BDM-1 column at 130 °C, 1 ml/min. Major: 18.72 min. Minor: 18.31 min.  **$^1\text{H NMR}$** : (300 MHz,  $\text{CDCl}_3$ )  $\delta$  3.7 (s, 3H), 2.99 (q, 1H), 2.62 (m, 1H), 2.32 (dd, 1H), 1.93 (m, 1H), 1.77 (m, 1H), 1.63 (m, 2H), 1.33 (s, 3H), 0.91 (t, 3H).  **$^{13}\text{C NMR}$** : (100 MHz,  $\text{CDCl}_3$ )  $\delta$  216.3, 175.6, 52.4, 52.1, 42.4, 39.6, 23.1, 22.2, 10.9. **IR** 3456, 2970, 1737, 1439, 1377, 1170, 1032. **HRMS**: (ESI-) Calc'd for  $\text{C}_{10}\text{H}_{16}\text{O}_4$ , 199.0976. Found 199.0979.

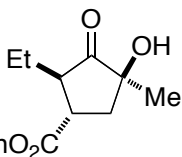

**(1S,2R,4S)-benzyl 2-ethyl-4-hydroxy-4-methyl-3-oxocyclopentanecarboxylate (4i)**  
 Rf= 0.31 (10% Ethyl Acetate/Dichloromethane); 24 mg (58%), 85% ee, 17:1 dr  $[\alpha]_D^{21} = -65.38$  ( $c = 0.0013$  g/ml,  $\text{CHCl}_3$ ) **GC Analysis** CP-Sil 8CB column at 140 °C, 3 ml/min. Major: 17.98 min. Minor: 19.92 min. **HPLC Analysis** : Chiralcel IC column 95:5 Hexanes/Isopropanol, 1ml/min. Major: 11.03 min. Minor: 9.89 min.  **$^1\text{H NMR}$** : (300 MHz,  $\text{CDCl}_3$ )  $\delta$  7.36 (bs, 5H), 5.18 (s, 2H), 3.06 (q, 1H), 2.65 (m, 1H), 2.32 (dd, 1H), 1.94 (m, 1H), 1.62 (m, 2H), 1.32 (s, 3H), 0.89 (t, 3H).  **$^{13}\text{C NMR}$** : (100 MHz,  $\text{CDCl}_3$ )  $\delta$  216.7, 174.9, 135.8, 128.8, 128.6, 128.4, 67.0, 51.9, 42.6, 39.5, 23.1, 22.3, 11.0. **IR** (NaCl, neat): 3448, 3034, 2969, 2935, 2878, 1734, 1455, 1385  $\text{cm}^{-1}$ . **HRMS**: (ESI-) calcd for  $\text{C}_{16}\text{H}_{19}\text{O}_4$ , 275.1289. Found 275.1292.

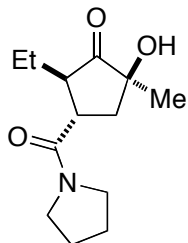

**(2S,4S,5R)-5-ethyl-2-hydroxy-2-methyl-4-(pyrrolidine-1-carbonyl)cyclopentanone (4j)**

R<sub>f</sub> = 0.27 (50% Ethyl Acetate/Dichloromethane); 30 mg (70%), 97% ee, 8:1:0.3:0.1 dr, [α]<sub>D</sub><sup>21</sup> = -40.0 (c = 0.0017 g/ml, CHCl<sub>3</sub>) **GC Analysis** CP-Sil 8CB at 140 °C, 3 ml/min. Major: 12.52 min. Minor: 10.08min, 9.59 min., BDM1 column at 170 °C, 3ml/min. Major: 20.23 min. Minor: 19.75 min. **<sup>1</sup>H NMR:** (300 MHz, CDCl<sub>3</sub>) δ 3.52 (quint, *J* = 6.6 Hz, 4H), 3.08 (m, 1H), 2.94 (m, 1H), 2.25 (dd, *J* = 6.9 Hz, 1H), 1.97-1.81 (m, 5H), 1.71 (m, 2H), 1.54 (m, 1H), 1.34 (s, 3H), 0.89 (t, *J* = 7.5 Hz, 3H). **<sup>13</sup>C NMR:** (100 MHz, CDCl<sub>3</sub>) δ 217.8, 172.3, 52.4, 46.8, 46.3, 42.1, 39.5, 26.2, 24.5, 23.4, 21.9, 11.3 **IR** (NaCl, neat): 3354, 2969, 2876, 1746, 1622, 1518, 1452, 1343, 1255, 1229, 1165cm<sup>-1</sup>. **HRMS:** (ESI+) Calcd for C<sub>13</sub>H<sub>22</sub>NO<sub>3</sub>, 240.1594. Found 240.1596.

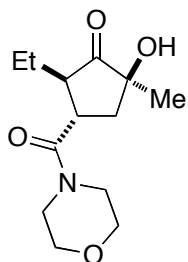

**(2S,4S,5R)-5-ethyl-2-hydroxy-2-methyl-4-(morpholine-4-carbonyl)cyclopentanone (4k)**

R<sub>f</sub> = 0.30 (100% Ethyl Acetate); 37 mg (99%), 98% ee, 9:1:0.4:0.1 dr, [α]<sub>D</sub><sup>21</sup> = -44.23 (c = 0.0052 g/ml, CHCl<sub>3</sub>) **GC Analysis** CP-Sil 8CB at 140 °C, 3 ml/min. Major: 14.49 min. Minor: 12.83min, 12.01 min, 12.45 min. BDM1 column at 160 °C, 3ml/min. Major: 41.07 min. Minor: 40.48 min. **<sup>1</sup>H NMR:** (300 MHz, CDCl<sub>3</sub>) δ 3.68 (m, 8H), 3.17 (m, 1H), 3.01 (m, 1H), 2.19 (dd, *J* = 6.9, 13.5 Hz, 1H), 1.81 (m, 2H), 1.55 (m, 1H), 1.33 (s, 3H), 0.89 (t, *J* = 7.5 Hz, 3H) **<sup>13</sup>C NMR:** (100 MHz, CDCl<sub>3</sub>) δ 217.0, 191.3, 172.0, 75.84, 66.9, 51.8, 45.9, 42.6, 39.8, 39.5, 23.1, 21.7, 11.1 **IR** (NaCl, neat): 3383, 2966, 1745, 1638, 1438, 1240, 1117 cm<sup>-1</sup>. **HRMS:** (ESI+) XX

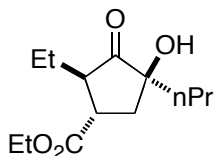

**(1S,2R,4S)-ethyl 2-ethyl-4-hydroxy-3-oxo-4-propylcyclopentanecarboxylate (4l)**

R<sub>f</sub> = 0.24 (10% Ethyl Acetate/Dichloromethane); 19 mg (53%), 85% ee, 16:1 dr [α]<sub>D</sub><sup>21</sup> = -70.0 (c = 0.0008 g/ml, CHCl<sub>3</sub>) **GC Analysis** CP-Sil 8CB at 110 °C, 1 ml/min. Major: 32.66min. Minor: 35.76 min. BDM-1 column at 130 °C, 1 ml/min. Major: 55.68 min.



Minor: 54.01 min. **<sup>1</sup>H NMR**: (300 MHz, CDCl<sub>3</sub>) δ 4.20 (q, 2H), 2.95 (q, 1H), 2.60 (m, 1H), 2.20 (dd, 1H), 2.02 (m, 1H), 1.79 (m, 1H), 1.60 (m, 3H), 1.50 (m, 2H) 1.29 (t, 3H), 0.92 (m, 6H). **<sup>13</sup>C NMR**: (100 MHz, CDCl<sub>3</sub>) δ 217.2, 175.1, 61.2, 52.5, 42.5, 38.9, 37.2, 21.9, 16.9, 14.6, 14.4, 11.1. **IR** (NaCl, neat): 3437, 2957, 2865, 1720, 1462, 1377, 1232, 1191 cm<sup>-1</sup>. **HRMS**: (ESI-) calcd for C<sub>13</sub>H<sub>21</sub>O<sub>4</sub>, 241.1445. Found 241.1442.

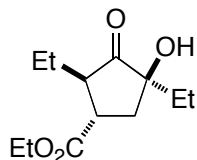

**(1S,2R,4S)-ethyl 2,4-diethyl-4-hydroxy-3-oxocyclopentanecarboxylate (4m)**

Rf= 0.21 (10% Ethyl Acetate/Dichloromethane); 42 mg (76%), 81% ee, 55:1:1 dr [α]<sub>D</sub><sup>21</sup> = -56.82 (c = 0.0022 g/ml, CHCl<sub>3</sub>) **GC Analysis** CP-Sil 8CB at 110 °C, 1 ml/min. Major: 20.19 min. Minor: 22.52, 24.50 min. BDM-1 column at 130 °C, 1 ml/min. Major: 35.16 min. Minor: 34.54 min. **<sup>1</sup>H NMR**: (300 MHz, CDCl<sub>3</sub>) δ 4.20 (q, 2H), 2.94 (q, 1H), 2.61 (m, 1H), 2.21 (dd, 1H), 1.99 (m, 1H), 1.78 (m, 1H), 1.60 (m, 3H), 1.29 (t, 3H), 0.92 (t, 3H). **<sup>13</sup>C NMR**: (100 MHz, CDCl<sub>3</sub>) δ 217.3, 175.2, 61.2, 52.6, 42.4, 36.7, 29.6, 21.9, 14.4, 11.1, 7.8. **IR** (NaCl, neat): 3467, 2970, 2938, 2880, 1734, 1518, 1462, 1378, 1231, 1179, 1035, 995, 947 cm<sup>-1</sup>. **HRMS**: (ESI-) calcd for C<sub>12</sub>H<sub>20</sub>O<sub>4</sub>, 227.1289. Found 227.1292.

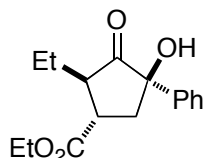

**(1S,2R,4R)-ethyl 2-ethyl-4-hydroxy-3-oxo-4-phenylcyclopentanecarboxylate (4n)**

Rf= 0.71 (10% Ethyl Acetate/Dichloromethane); 39 mg (95%), 83% ee, 4.4:1:<1:<1 dr [α]<sub>D</sub><sup>21</sup> = -62.50 (c = 0.002 g/ml, CHCl<sub>3</sub>) **GC Analysis** CP-Sil 8CB at 170 °C, 2 ml/min. Major: 6.40min. Minor: 6.50, 7.96, 7.86 min. **HPLC Analysis** : Chiralcel IC column 95:5 Hexanes/Isopropanol, 1ml/min. Major: 9.43 min. Minor: 10.13 min. **<sup>1</sup>H NMR**: (300 MHz, CDCl<sub>3</sub>) δ 7.35 (bs, 5H), 4.15 (m, 2H), 3.13 (q, 1H), 2.83 (m, 1H), 2.60 (dd, 1H), 2.30 (m, 0.5H), 1.74 (m, 1H), 1.27 (q, 3H), 0.98 (t, 3H). **<sup>13</sup>C NMR**: (100 MHz, CDCl<sub>3</sub>) δ 215.7, 174.7, 141.2, 128.7, 128.2, 125.6, 61.3, 53.9, 42.8, 42.0, 22.0, 14.4, 11.0. **IR** (NaCl, neat): 3442, 3062, 2973, 2938, 2878, 1733, 1496, 1448, 1376 cm<sup>-1</sup>. **HRMS**: (ESI+) calcd for C<sub>16</sub>H<sub>20</sub>O<sub>4</sub>Na, 299.1254. Found 299.1256.

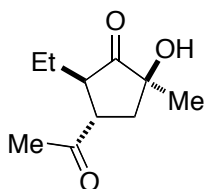

**(2S,4S,5R)-4-acetyl-5-ethyl-2-hydroxy-2-methylcyclopentanone (4p)**

Rf= 0.3 (10% Ethyl Acetate/Dichloromethane); 24mg (58%), 68% ee, 9:1:0.4:0.6 dr,  $[\alpha]_D^{21} = -56.0$  (c = 0.0025g/ml, CHCl<sub>3</sub>) **GC Analysis** [CP-Sil 8CB] at 110 °C, 1 ml/min. Major: 6.96. Minor: 7.37 min, 8.05 min, 8.38 min. **HPLC Analysis**: Chiracel IC column at 98% Hexanes/Isopropanol, 1ml/min. Major: 33.32 min. Minor: 27.89 min. **<sup>1</sup>H NMR**: (300 MHz; CDCl<sub>3</sub>):  $\delta$  3.17 (td, *J* = 10.2, 7.4 Hz, 1H), 2.78-2.71 (m, 1H), 2.36 (dd, *J* = 13.5, 7.4 Hz, 1H), 2.27 (s, 3H), 2.01-2.00 (m, 1H), 1.77-1.66 (m, 2H), 1.62-1.52 (m, 2H), 1.31 (s, 3H), 0.88 (t, *J* = 7.5 Hz, 3H). **<sup>13</sup>C NMR**: (100 MHz, CDCl<sub>3</sub>):  $\delta$  217.1, 208.9, 75.9, 49.9, 49.8, 39.4, 29.5, 22.9, 22.1, 11.0 **IR** (NaCl, neat): 3442, 2971, 2931, 1741, 1702, 1437, 1386, 1267, 1226, 1162 cm<sup>-1</sup>. **HRMS**: (ESI-) calcd for C<sub>10</sub>H<sub>15</sub>O<sub>3</sub>, 183.1027. Found 183.1027.

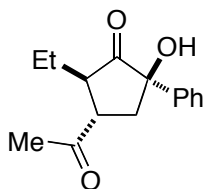

**(2*R*,4*S*,5*R*)-4-acetyl-5-ethyl-2-hydroxy-2-phenylcyclopentanone (4q)**

Rf= 0.12 (10% Ethyl Acetate/Dichloromethane); 12mg (35%), % ee, 4:1:0.4:0.6 dr,  $[\alpha]_D^{21} = -104$  (c = 0.003g/ml, CHCl<sub>3</sub>) **GC Analysis**: CP-Sil 8CB at 170 °C and 3 ml/min. Major: 25.108 min. Minor: 26.679 min, 30.489 min, 35.243 min. **HPLC Analysis** Chiracel IC column at 95% Hexanes/*i*PrOH, 1 ml/min. Major: 11.248 min. Minor 12.768 min. **<sup>1</sup>H NMR**: (300 MHz; CDCl<sub>3</sub>):  $\delta$  7.41-7.27 (m, 5H), 3.33 (td, *J* = 11.0, 6.7 Hz, 1H), 2.95 (dt, *J* = 10.9, 5.6 Hz, 1H), 2.66-2.56 (m, 2H), 2.32-2.24 (m, 3H), 2.02 (ddd, *J* = 13.6, 11.5, 2.0 Hz, 1H), 1.86-1.76 (m, 1H), 1.74-1.64 (m, 1H), 1.64-1.57 (m, 1H), 0.96-0.88 (m, 3H). **<sup>13</sup>C NMR**: (100 MHz, CDCl<sub>3</sub>)  $\delta$  215.9, 208.4, 140.9, 128.5, 128.0, 125.2, 80.2, 52.3, 49.8, 41.9, 29.7, 21.7, 11.0 **IR** (NaCl, neat): 3410, 3061, 3029, 2966, 2934, 2877, 2252, 1956, 1744, 1708, 1600, 1518, 1495, 1448, 1367, 1217 cm<sup>-1</sup>.

Procedure for the synthesis of **4d**:

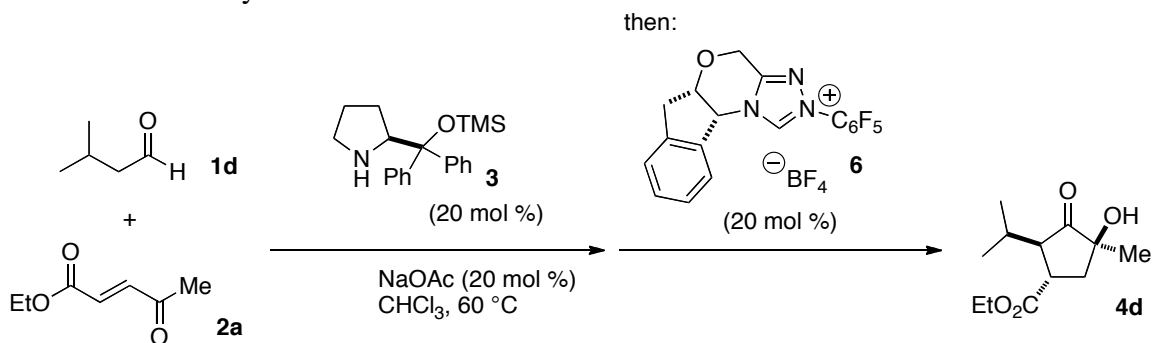

**(1*S*,2*R*,4*S*)-ethyl 4-hydroxy-2-isopropyl-4-methyl-3-oxocyclopentanecarboxylate (4d)**

In a 5 ml round bottom flask, 25 mg of **2a** (0.17 mmol) was combined with 10 mg of **3** (0.2 equiv, 0.03 mmol) and 1.7  $\mu$ l of AcOH (0.2 equiv., 0.03 mmol) and dissolved in 1 ml of chloroform. The reaction was stirred at 60 °C for 3 hours. The reaction was cooled to

room temperature and 14 mg of **6** (0.2 equiv., 0.03 mmol) and 5 mg of sodium acetate (0.4 equiv., 0.06 mmol) were added. The reaction was stirred at 60 °C for an additional 4 hours. The reaction was cooled to room temperature and filtered through a plug of silica gel, washing with DCM then EtOAc. The filtrate was concentrated and purified by column chromatography, eluting with 10% EtOAc/DCM to 50% EtOAc/Hexanes through silica gel. Isolated a yellow oil.

R<sub>f</sub> = 0.35 (10% Ethyl Acetate/Dichloromethane); 49 mg (90%), 88% ee, 24:1:0.1 dr, [α]<sub>D</sub><sup>21</sup> = -66.96 (c = 0.0046 g/ml, CHCl<sub>3</sub>) **GC Analysis** CP-Sil 8CB column at 90 °C, 2 ml/min. Major: 24.48 min. Minor: 26.62 min, 27.69 min. BDM1 column at 130 °C, 2ml/min. Major: 18.48 min. Minor: 17.71 min. **<sup>1</sup>H NMR:** (300 MHz, CDCl<sub>3</sub>) δ 4.20 (q, *J* = 6.9, 2H), 3.08 (q, *J* = 7.5, 1H), 2.72 (dd, *J* = 3.9, 9.9, 1H), 2.92 (dd, *J* = 7.5, 13.8, 1H), 2.25 (m, 1H), 1.90 (m, 2H), 1.31 (s, 3H), 1.29 (t, *J* = 7.2, 3H), 0.97 (d, *J* = 6.9, 3H), 0.91 (d, *J* = 6.9, 3H). **<sup>13</sup>C NMR:** (100 MHz, CDCl<sub>3</sub>) δ 216.7, 175.7, 61.2, 56.7, 39.9, 39.6, 27.9, 22.9, 20.3, 18.8, 14.3 **IR** (NaCl, neat): 3472, 2967, 2876, 1735, 1519, 1466, 1378, 1338, 1239, 1177 cm<sup>-1</sup>. **HRMS:** (ESI-) Calcd for C<sub>12</sub>H<sub>19</sub>O<sub>4</sub>, 227.1289. Found 227.1291.

Procedure for the synthesis of **4o**:

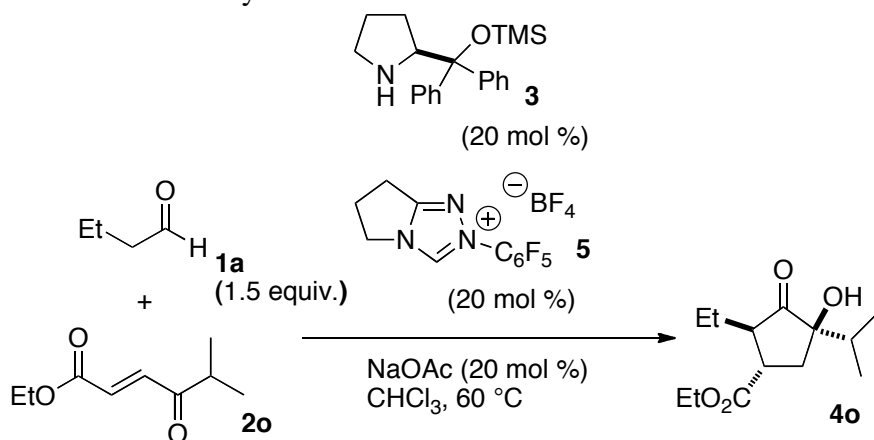

**(1*S*,2*R*,4*R*)-ethyl 2-ethyl-4-hydroxy-4-isopropyl-3-oxocyclopentanecarboxylate (**4o**)**

In a 5 ml round bottom flask, combined 25 mg of **2o** (0.15 mmol) with 10 mg of **3** (0.2 equiv., 0.03 mmol) and 11 mg of **5** (0.2 equiv., 0.03 mmol). Dissolved in 1 ml of CHCl<sub>3</sub> and bubbled Ar into the reaction mixture for 1 minute. Added 20 μl of butyraldehyde (**1a**, 1.5 equiv., 0.22 mmol) and 2.5 mg of NaOAc (0.2 equiv., 0.03 mmol). Stirred at 80 °C for 4 hours. Cooled to room temperature and filtered through a plug of silica gel, washing with DCM then EtOAc. Concentrated the filtrate and purified by column chromatography, eluting with 10% EtOAc/DCM through 50% EtOAc/Hexanes through silica gel. Isolated a yellow solid (mixture of diastereomers).

R<sub>f</sub> = 0.3 (10% Ethyl Acetate/Dichloromethane); 25 mg (69%), 51% ee, 18:1:0.1:0.7 dr, [α]<sub>D</sub><sup>21</sup> = -44.50 (c = 0.004 g/ml, CHCl<sub>3</sub>) **GC Analysis** CP-Sil 8CB at 110 °C, 1 ml/min. Major: 27.97min. Minor: 28.35 min, 30.41 min, 32.16 min. BDM1 column at 130 °C, 2ml/min. Major: 26.85 min. Minor: 27.55 min. **<sup>1</sup>H NMR**: (300 MHz, CDCl<sub>3</sub>) δ 4.21 (q, *J* = 7.2, 2H), 2.93 (q, *J* = 7.2, 1H), 2.54 (q, *J* = 5.7, 1H), 2.01 (m, 3H), 1.83 (m, 2H), 1.60 (m, 1H), 1.29 (t, *J* = 6.9, 3H), 0.98 (d, *J* = 6.9, 3H), 0.90 (t, *J* = 7.5, 3H), 0.83 (d, *J* = 6.9, 3H). **<sup>13</sup>C NMR**: (100 MHz, CDCl<sub>3</sub>) δ 217.6, 175.2, 81.4, 61.2, 53.9, 42.2, 33.4, 33.3, 21.5, 17.7, 16.2, 14.4, 10.9 **IR** (NaCl, neat): 3467, 2967, 2878, 1735, 1466, 1377, 1233, 1180 cm<sup>-1</sup>. **HRMS**: (ESI<sup>-</sup>) calcd for C<sub>13</sub>H<sub>21</sub>O<sub>4</sub>, 241.1445. Found 241.1444.

Procedure for diol **7**:

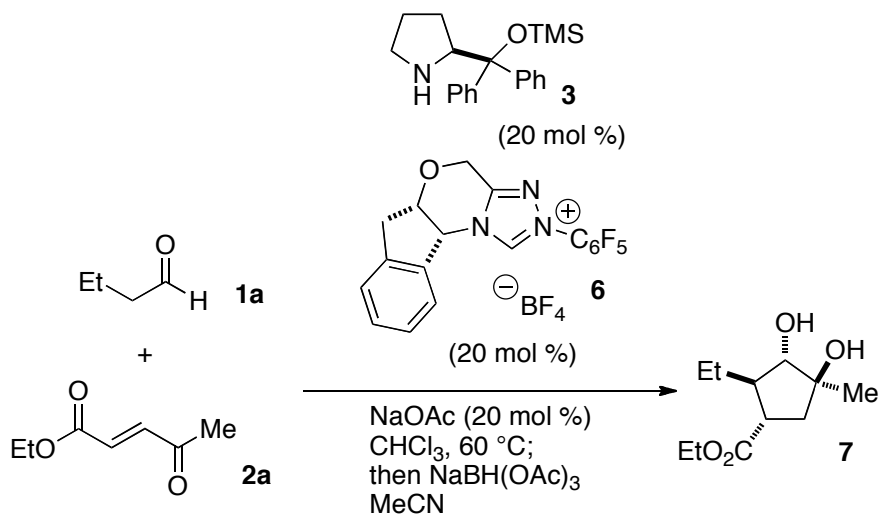

**(1*S*,2*R*,3*S*,4*S*)-ethyl 2-ethyl-3,4-dihydroxy-4-methylcyclopentanecarboxylate (**7**)**

In a 5 ml round bottom flask, 25 mg (0.17 mmol) of **2a** was combined with 10 mg of **3** (0.2 equiv., 0.03 mmol) and 14 mg of **6** (0.2 equiv., 0.03 mmol). This mixture was taken up in CHCl<sub>3</sub> and bubbled with Ar for 1 minute. 18 μl of butyraldehyde (**1a**, 1.2 equiv., 0.2 mmol) and 2.5 mg of NaOAc (0.2 equiv, 0.03 mmol) were added and the reaction was stirred at 60 °C for 5 hours. The reaction was cooled to room temperature and 40 mg of NaBH(OAc)<sub>3</sub> (1.1 equiv., 0.19 mmol) and 1 ml of acetonitrile were added. The suspension was stirred at room temperature overnight. The reaction mixture was filtered through silica gel, eluting with EtOAc. The filtrate was concentrated and purified by column chromatography, eluting with 100% EtOAc through silica gel. Isolated a yellow oil.

R<sub>f</sub> = 0.22 (100% Ethyl Acetate); 31mg (84%), 88% ee, 35:1:<1:<1 dr, [α]<sub>D</sub><sup>21</sup> = -67.33 (c = 0.0015 g/ml, CHCl<sub>3</sub>) **GC Analysis** CP-Sil 8CB at 130 °C, 1 ml/min. Major: 8.69min. Minor: 5.6 min, 7.33 min, 5.12 min. BDM1 column at 120 °C, 2ml/min. Major: 62.36 min. Minor: 61.63 min. **<sup>1</sup>H NMR**: (300 MHz, CDCl<sub>3</sub>) δ<sub>H</sub> 4.13 (2 H, q, *J* 7.0, A), 3.55 (1 H, d, *J* 6.8, B), 2.60 (1 H, d, *J* 8.7, C), 1.99 (3 H, m, *J* 8.7, D), 1.65 (1 H, d, *J* 7.4, E), 1.54 (1 H, d, *J* 7.3, F), 1.31 (3 H, sG), 1.22-1.27 (3 H, mH), 0.94 (3 H, t, *J* 7.4, I). **<sup>13</sup>C NMR**: (100 MHz, CDCl<sub>3</sub>) δ<sub>C</sub> 176.0, 84.4, 80.1, 60.6, 51.2, 44.5, 41.3, 26.5, 22.9, 14.1, 11.8 **IR**

(NaCl, neat): 3421, 2964, 2934, 2877, 1729, 1519, 1458, 1376, 1179  $\text{cm}^{-1}$ . **HRMS:** (ESI+) calcd for  $\text{C}_{11}\text{H}_{21}\text{O}_4$ , 217.1434. Found 217.1444.

Procedure for Aldehyde **8**:

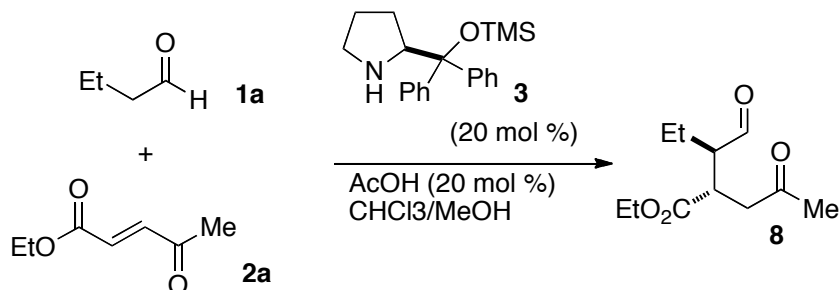

**(2*S*,3*R*)-ethyl 3-formyl-2-(2-oxopropyl)pentanoate (**8**)**<sup>9</sup>

In a 5 ml round bottom flask, combined 200 mg of **2a** (1.41 mmol) with 45 mg of **3** (0.1 equiv, 0.14 mmol). Dissolved in 6 ml of  $\text{CHCl}_3$  and 1 ml of MeOH, added 0.15 ml of butyraldehyde (**1a**, 1.2 equiv., 1.69 mmol) and 2 drops of acetic acid. Stirred at 60 °C for 5 hours. Cooled to room temperature and concentrated. Purified by column chromatography, eluting with 10% EtOAc/Hexanes through silica gel. Isolated as a mixture of diastereomers. Product is a yellow oil.

R<sub>f</sub> = 0.45 (10% Ethyl Acetate/Dichloromethane); 301mg (99%), 96% ee, 1.1:1 dr,  $[\alpha]_{\text{D}}^{21} = +20.8$  ( $c = 0.005$  g/ml,  $\text{CHCl}_3$ ) **GC Analysis.** **<sup>1</sup>H NMR:** (300 MHz,  $\text{CDCl}_3$ )  $\delta_{\text{H}}$  9.65 (1 H, s), 4.10-4.18 (2 H, m), 3.29-3.39 (1 H, m), 2.97 (1 H, ddd,  $J$  25.6, 17.9 and 9.3), 2.53-2.59 (1 H, m), 2.36-2.53 (1 H, m), 2.17-2.22 (3 H, s), 1.70-1.80 (1 H, m), 1.40-1.54 (2 H, m), 1.22-1.32 (3 H, m), 0.94-1.00 (3 H, m). **<sup>13</sup>C NMR:** (100 MHz,  $\text{CDCl}_3$ )  $\delta_{\text{C}}$  206.3, 206.1, 202.4, 191.3, 178.7, 18.3, 173.2, 172.9, 61.1, 54.1, 47.8, 47.4, 41.9, 41.5, 41.3, 39.3, 30.0, 29.9, 22.7, 21.9, 19.4, 14.0, 12.0. **IR** (NaCl, neat): 2971, 2881, 1720, 1463, 1369, 1165, 1045  $\text{cm}^{-1}$ . **HRMS:** (ESI+) calcd for  $\text{C}_{11}\text{H}_{19}\text{O}_4$ , 215.1278. Found 215.1270.

<sup>9</sup> J. Wang, A. Ma and D. Ma, *Org Lett.*, 2008, **10**, 5425.

# <sup>1</sup>H and <sup>13</sup>C Spectra

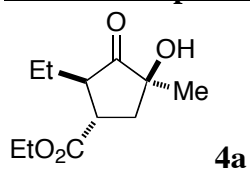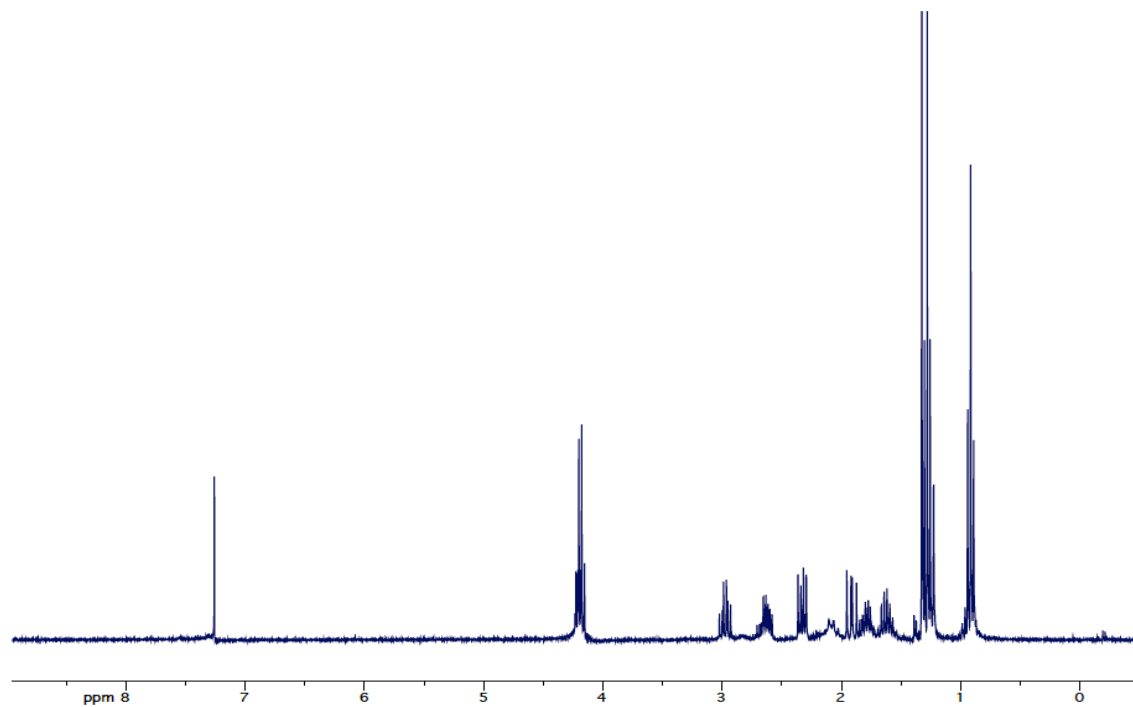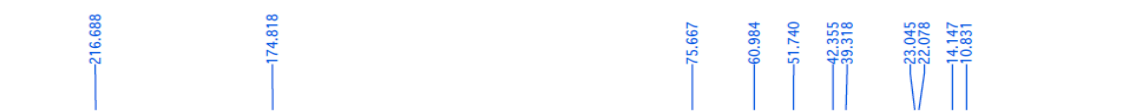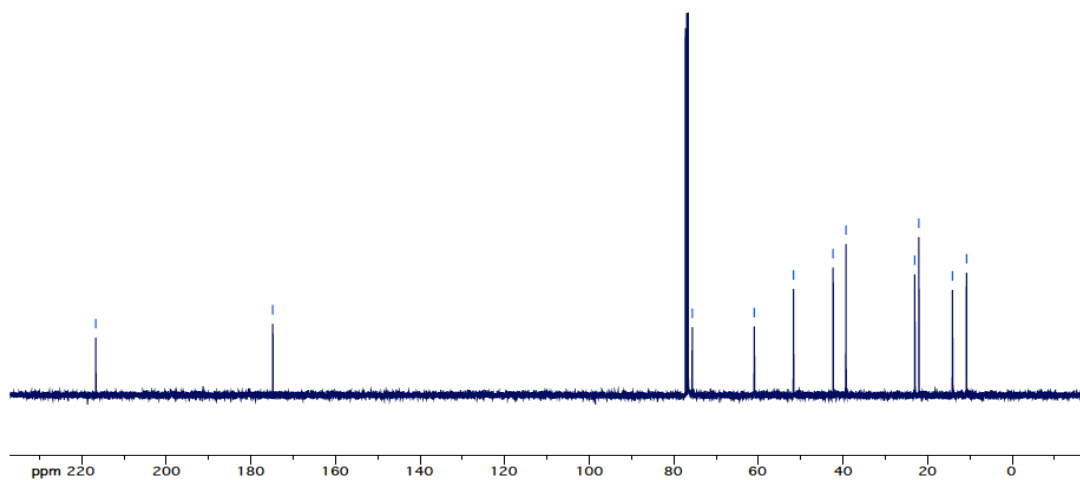

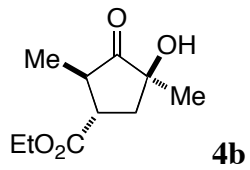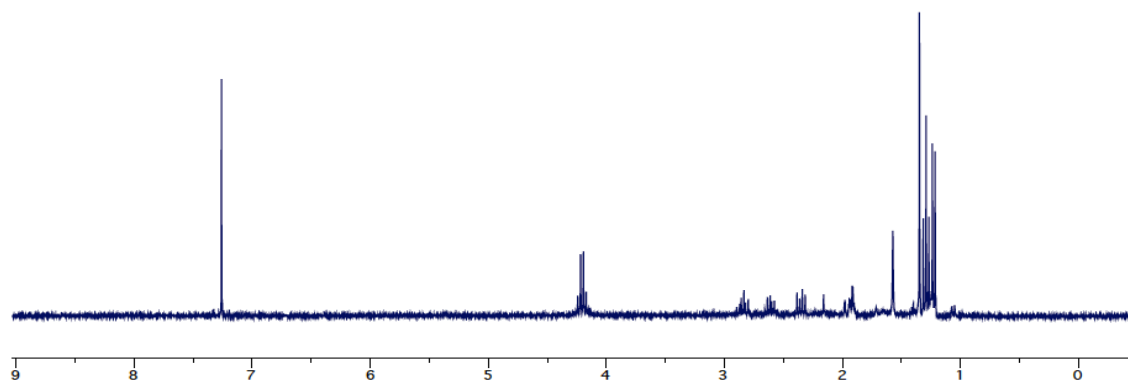

217.437

174.498

75.799

61.217

46.062

45.407

39.288

23.489

14.412

13.979

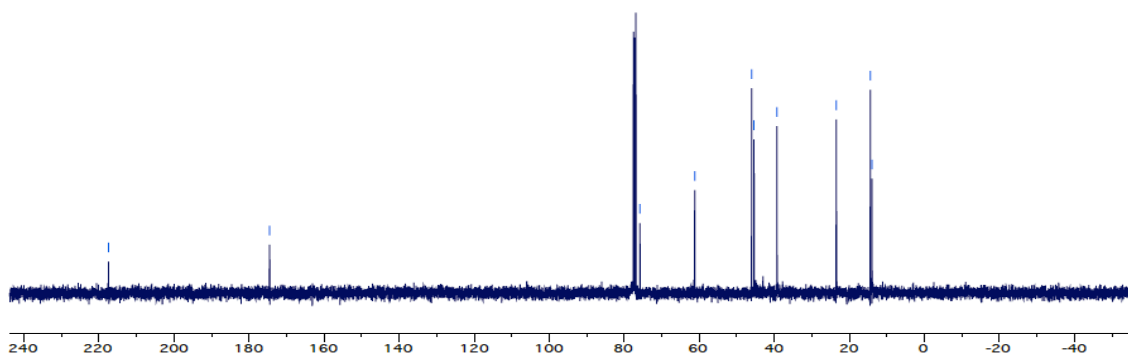

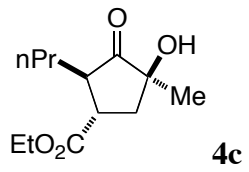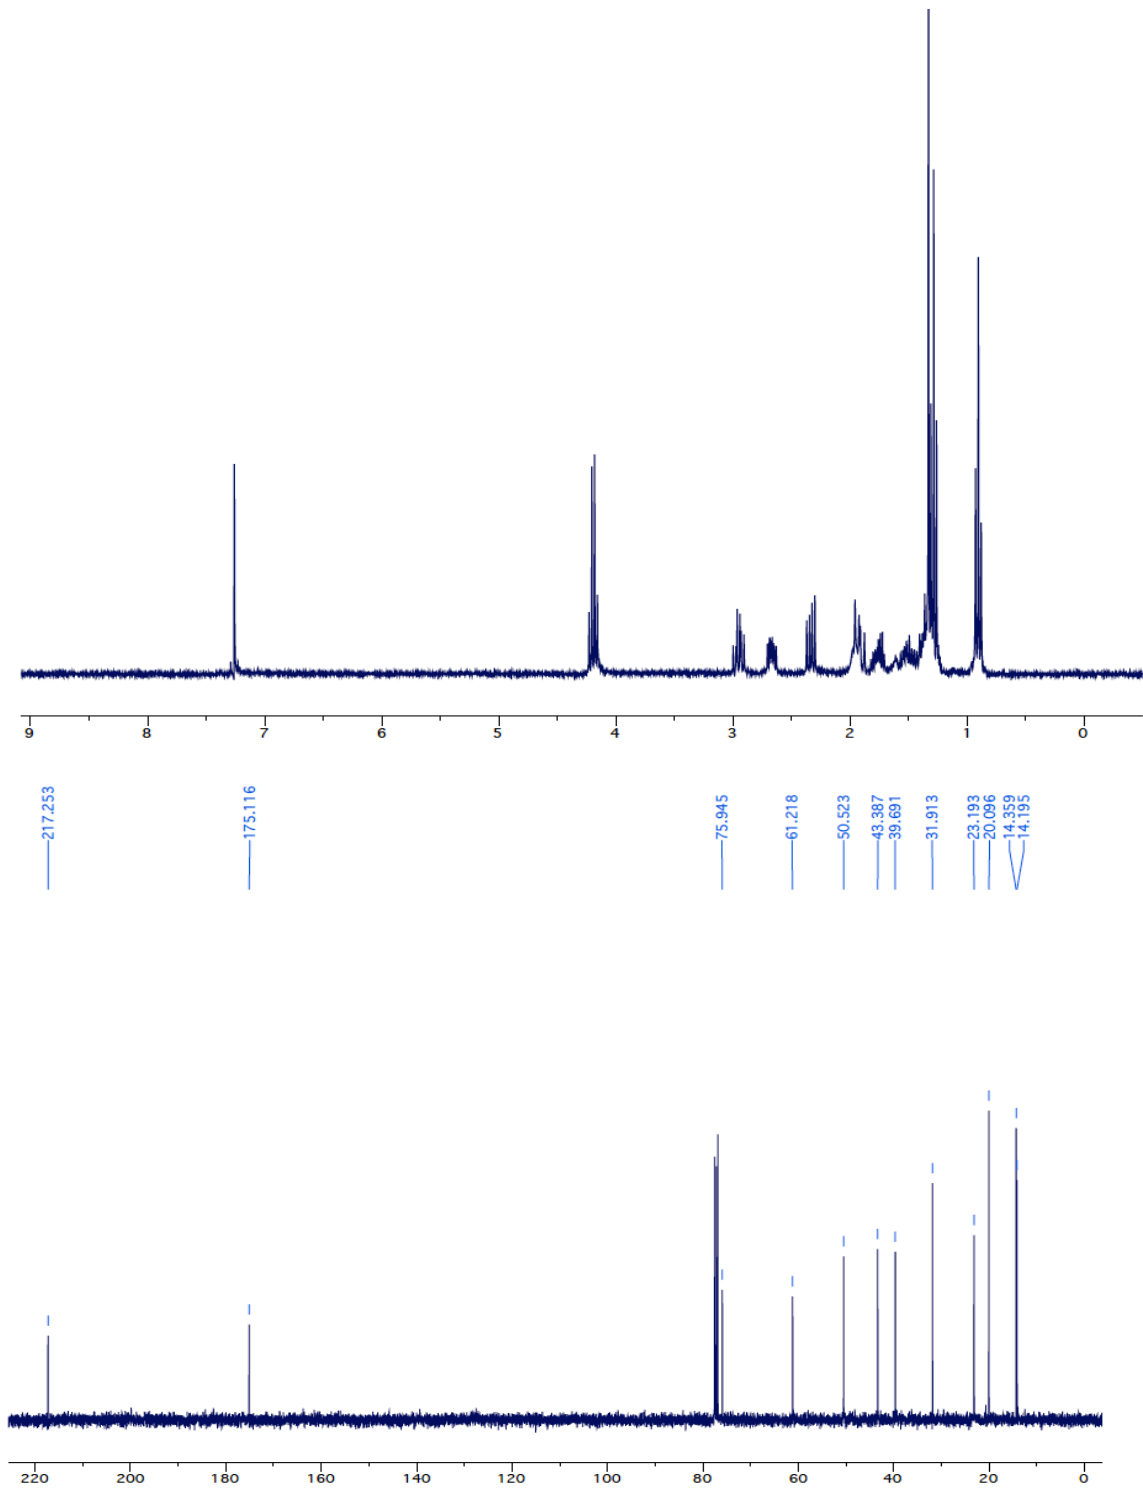



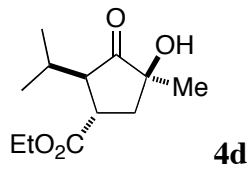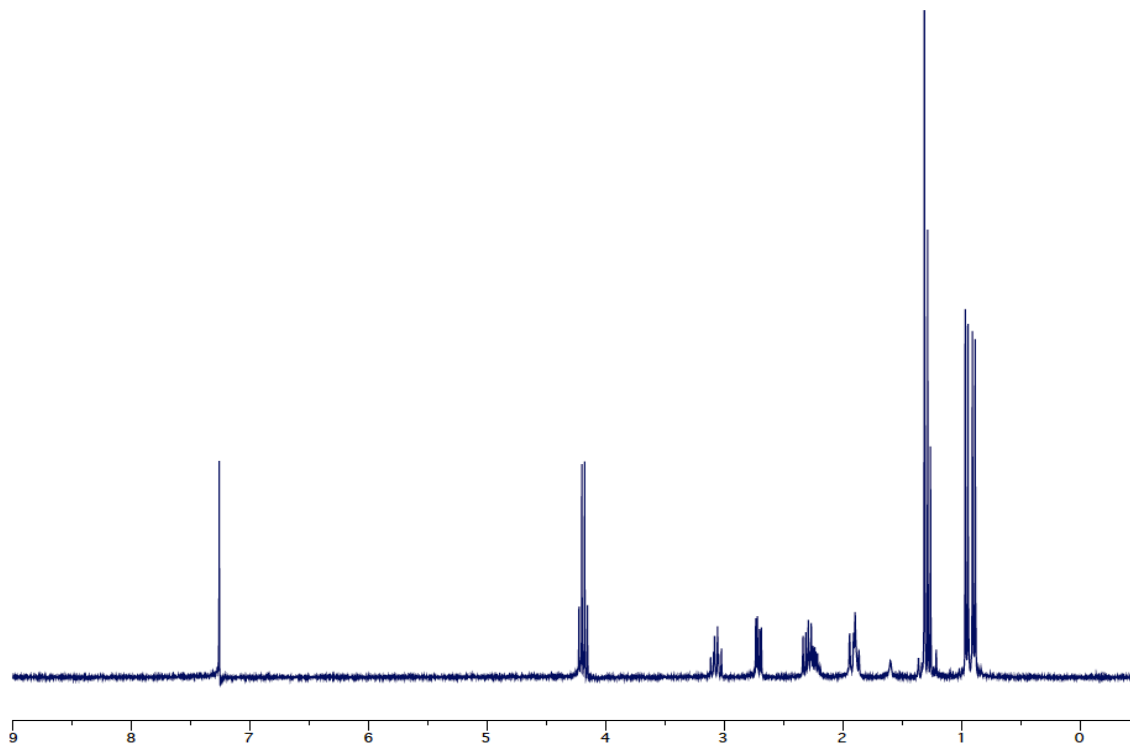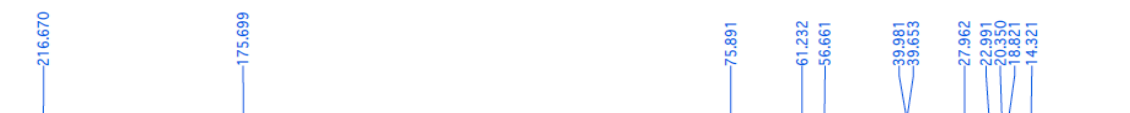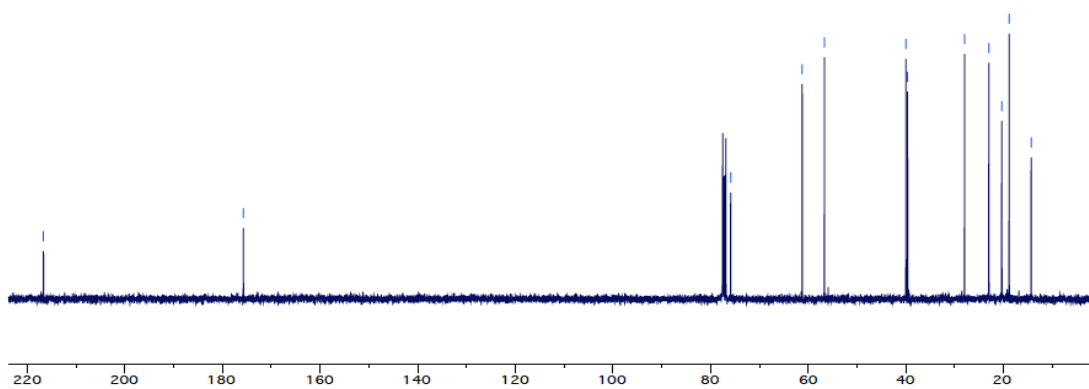

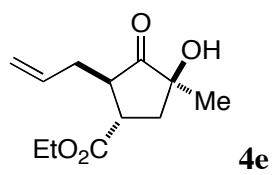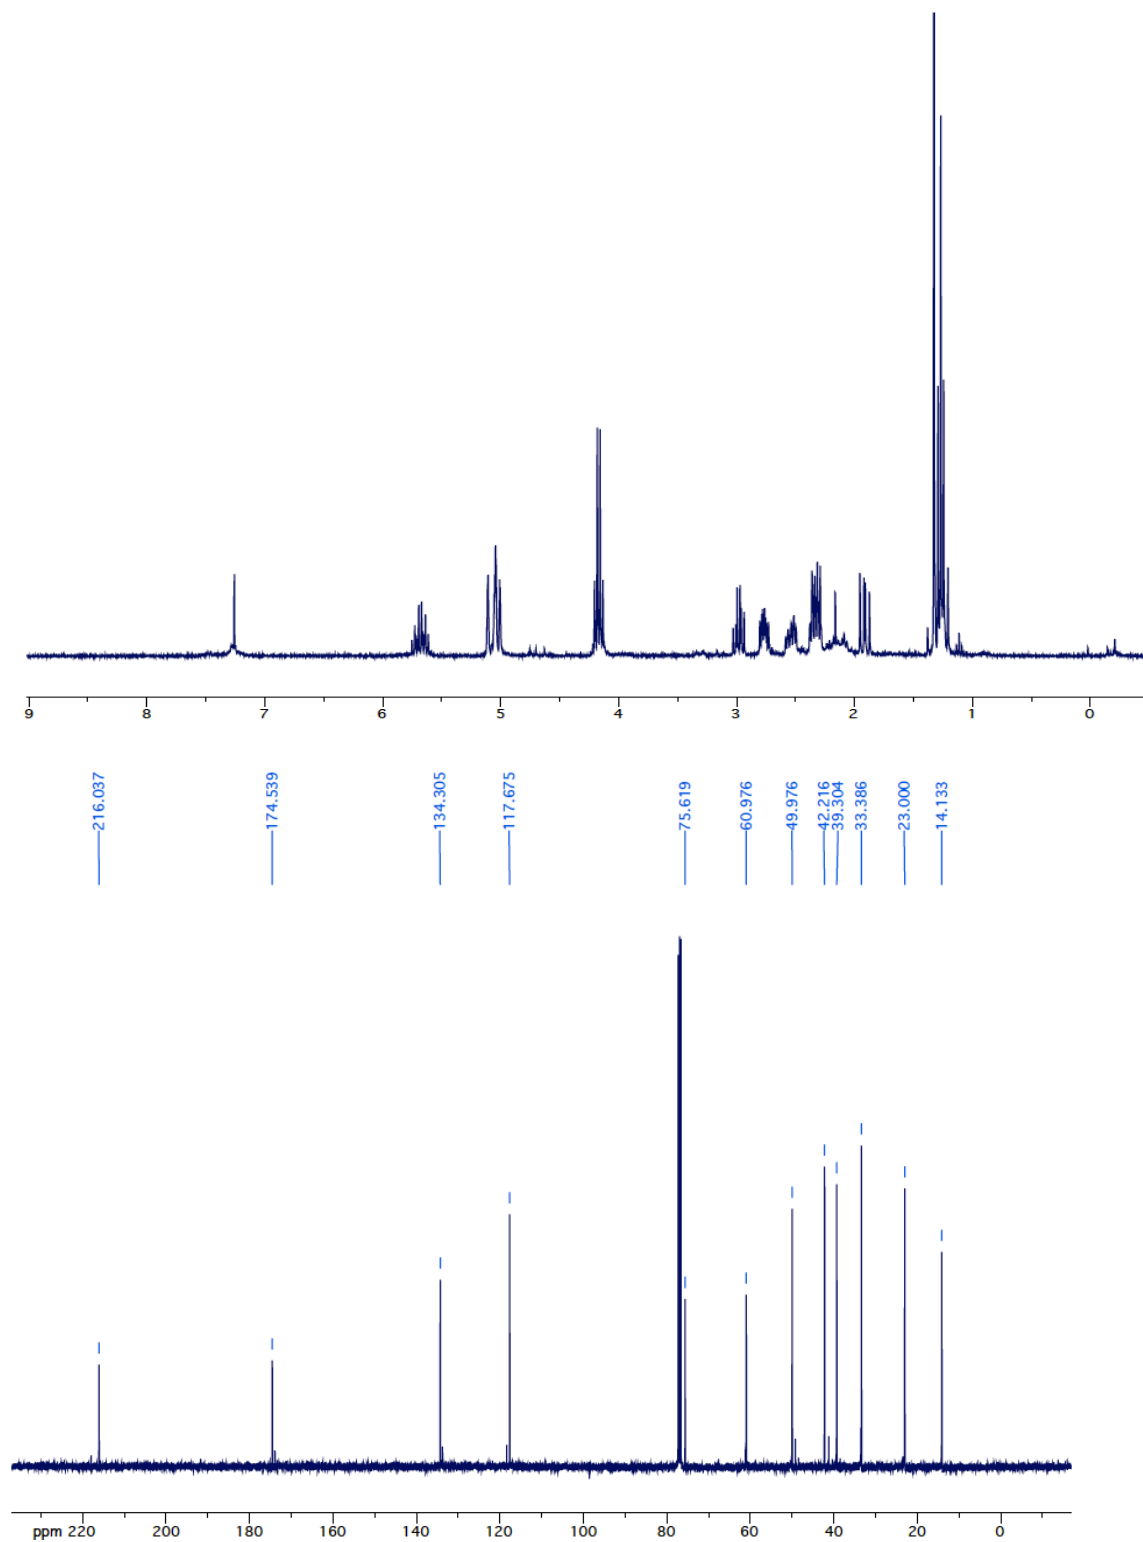

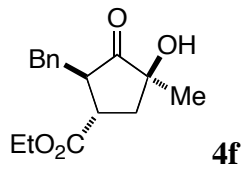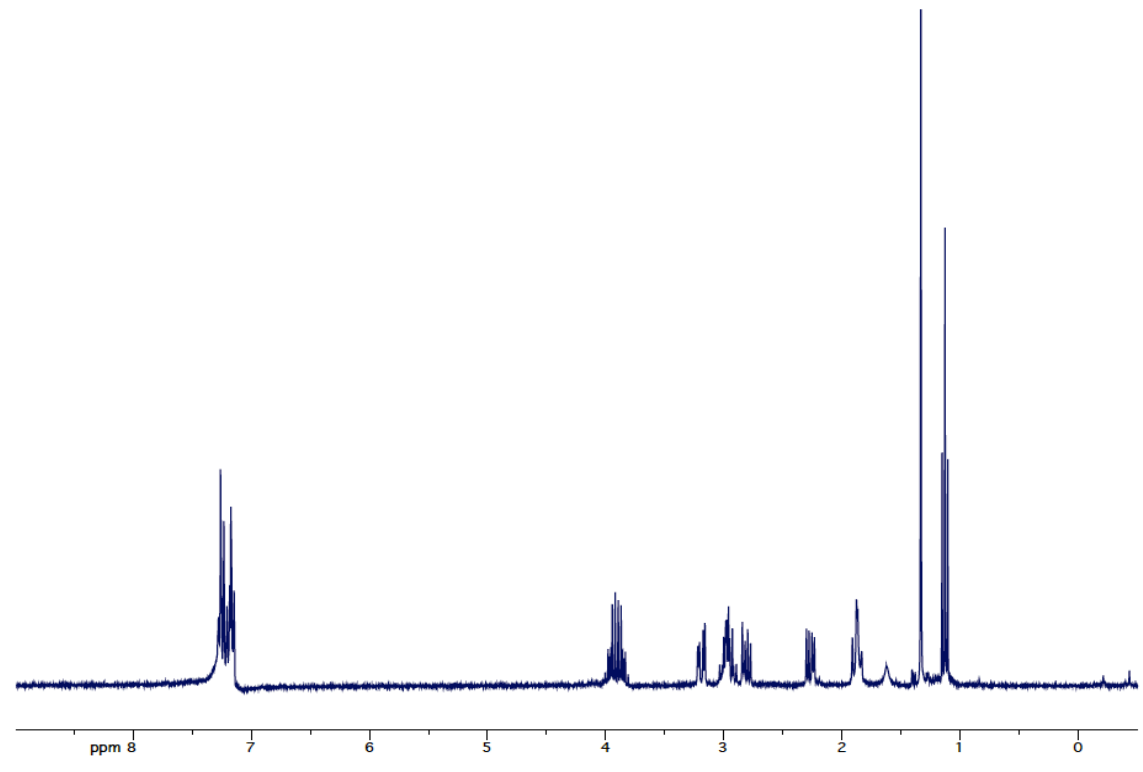

215.978  
174.587  
138.297  
129.553  
128.535  
126.714  
75.808  
61.116  
52.521  
42.806  
39.726  
35.427  
23.120  
14.197

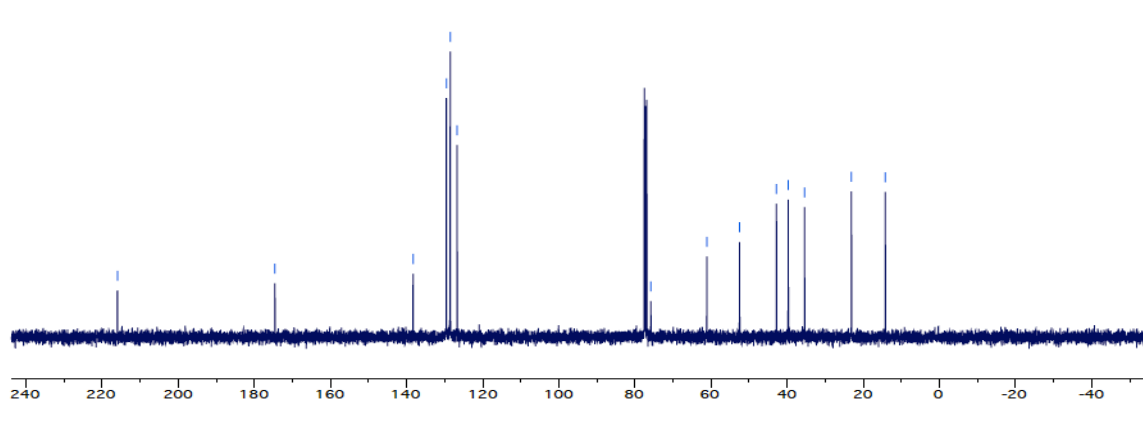

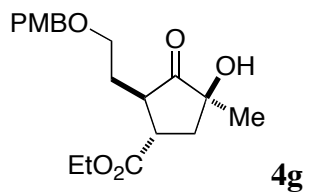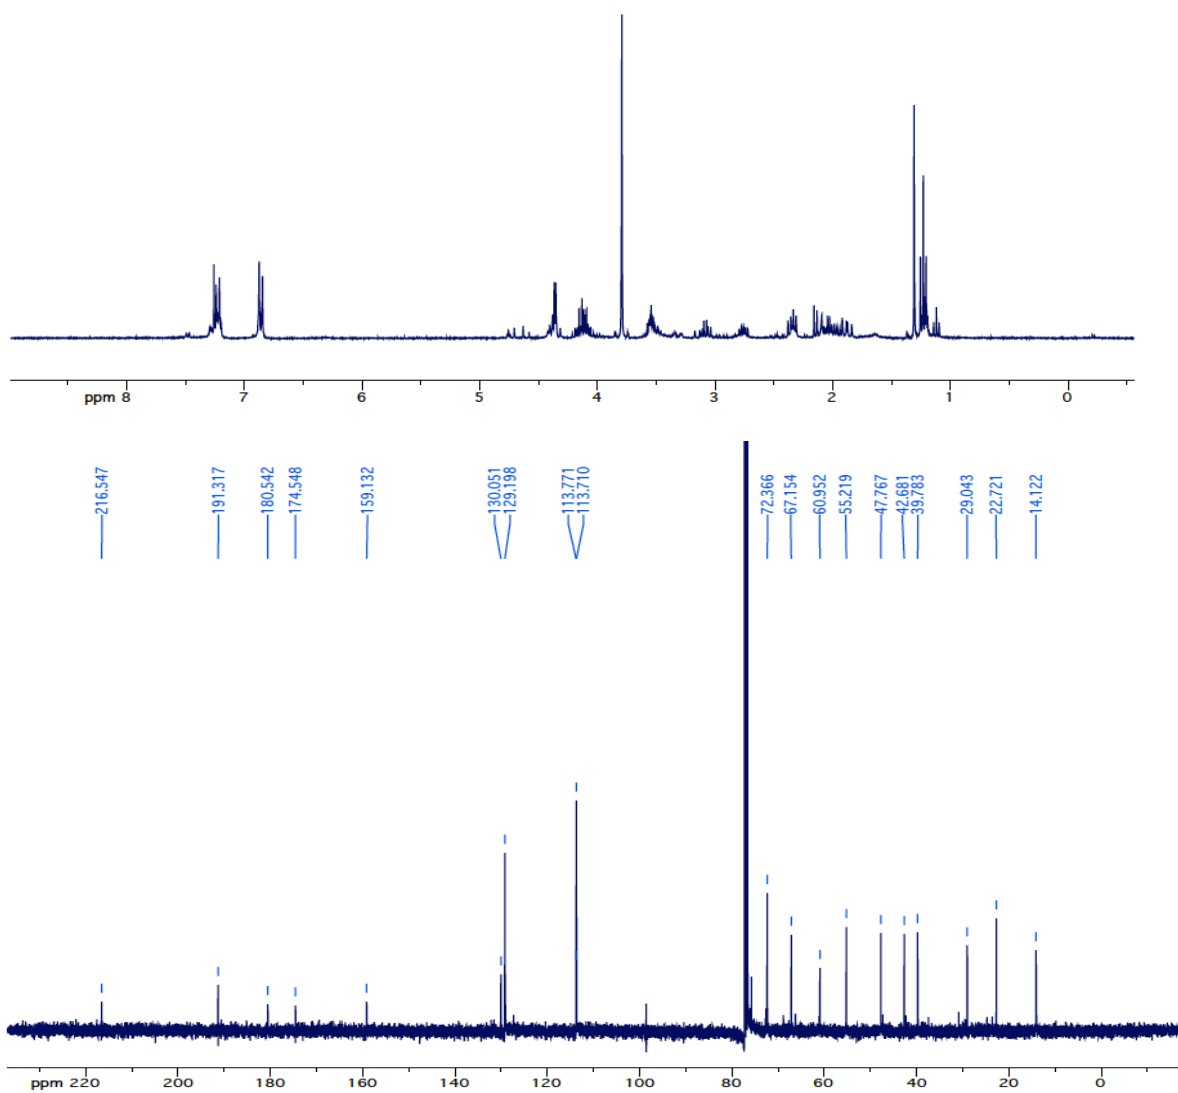

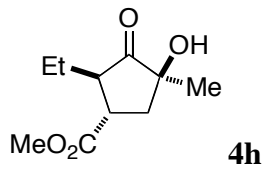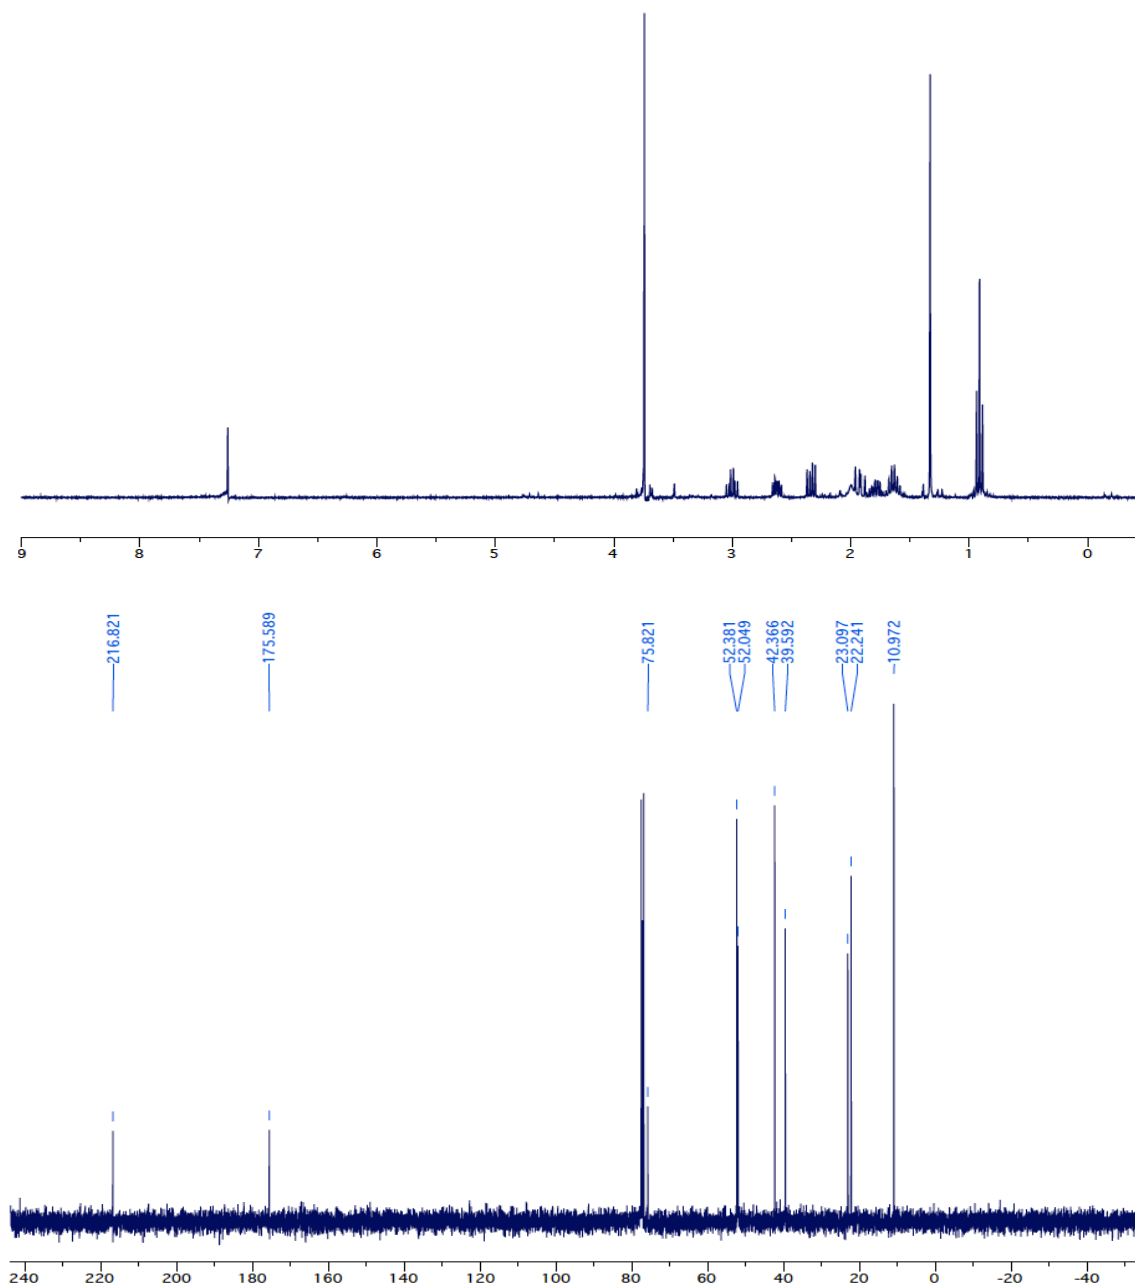

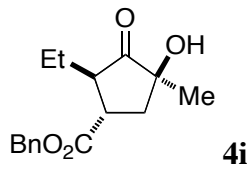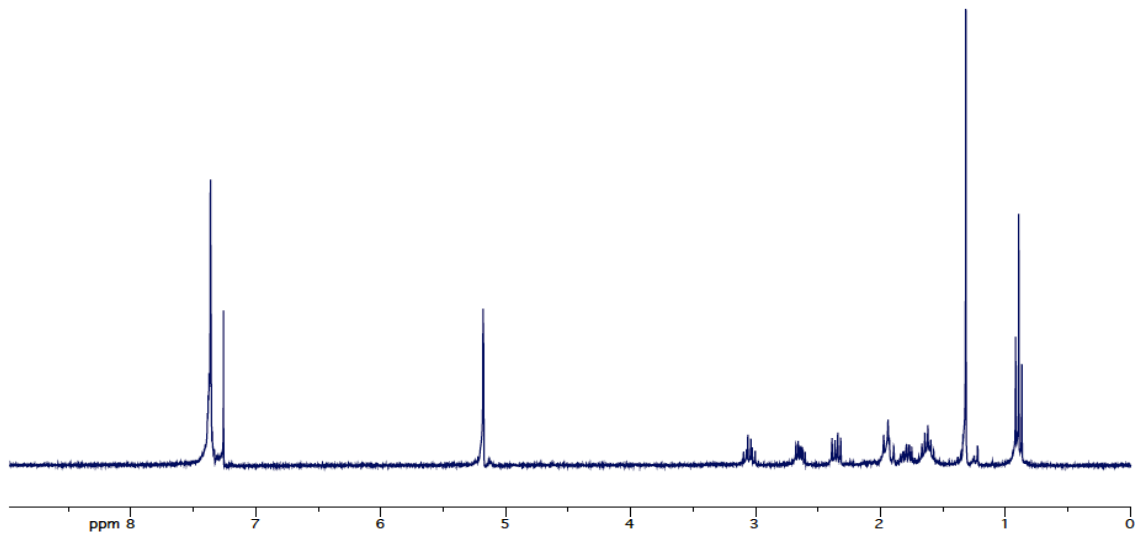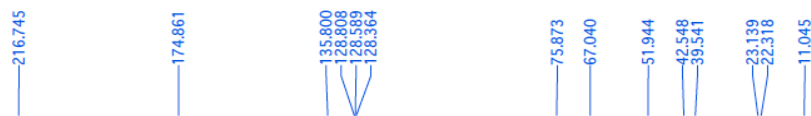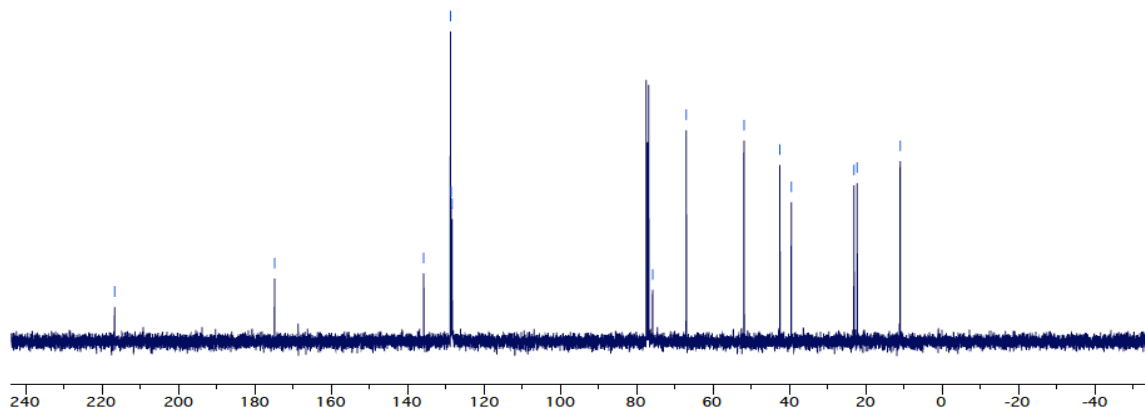

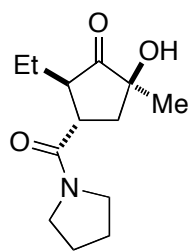

4j

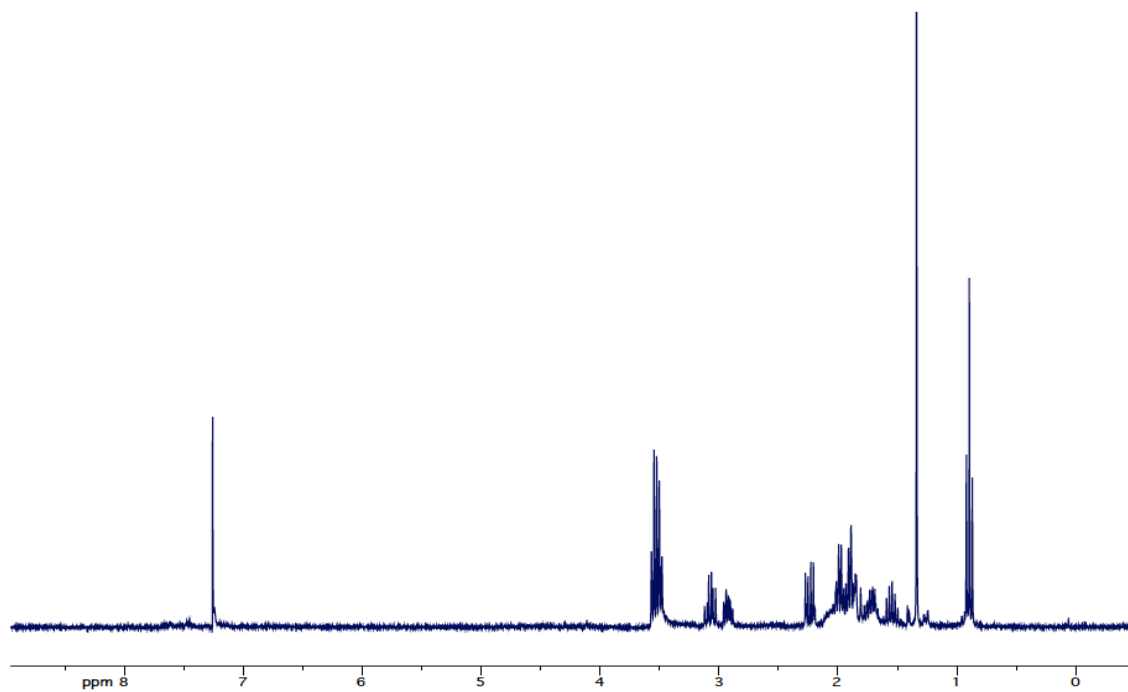

217.816

172.255

76.034

52.426

46.790

46.254

42.440

39.544

26.233

24.484

23.361

21.917

11.318

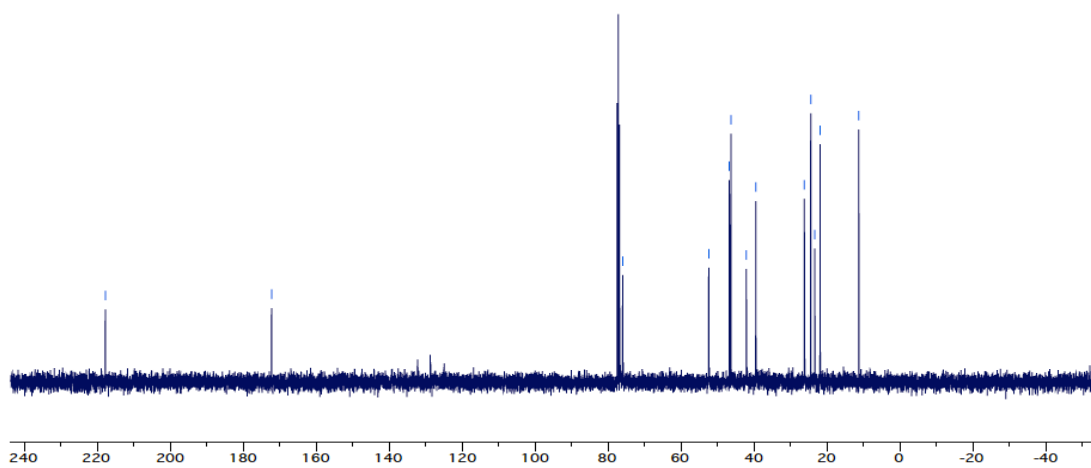

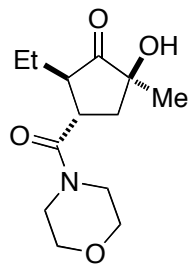

4k

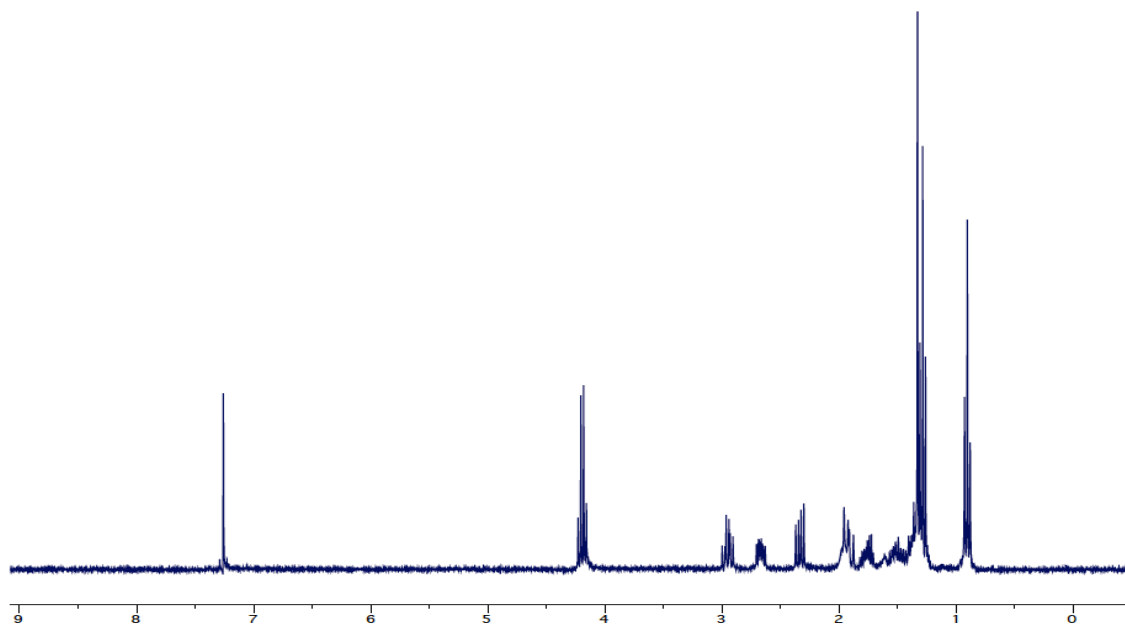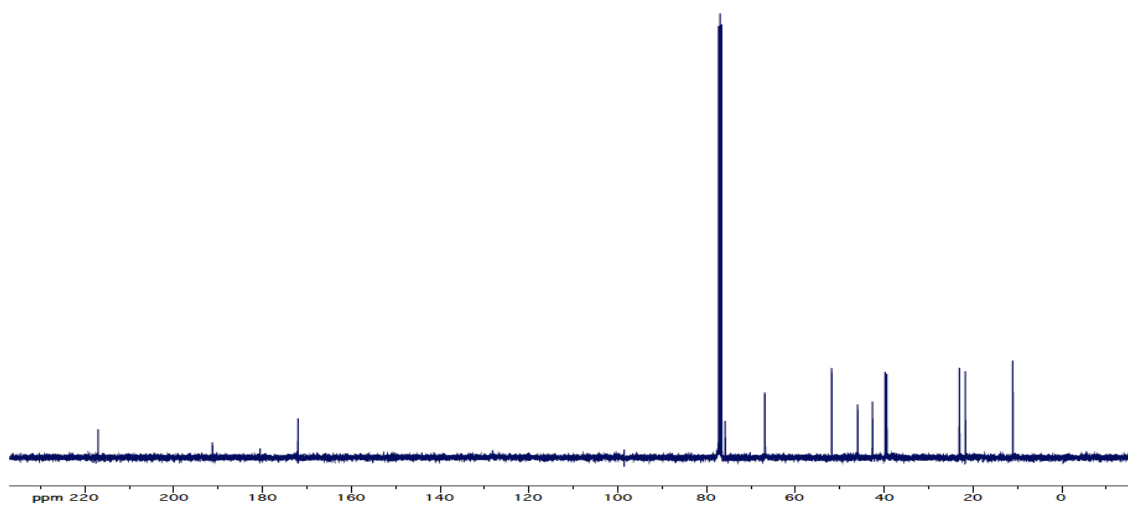



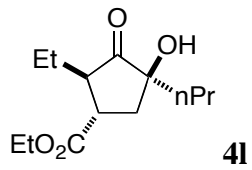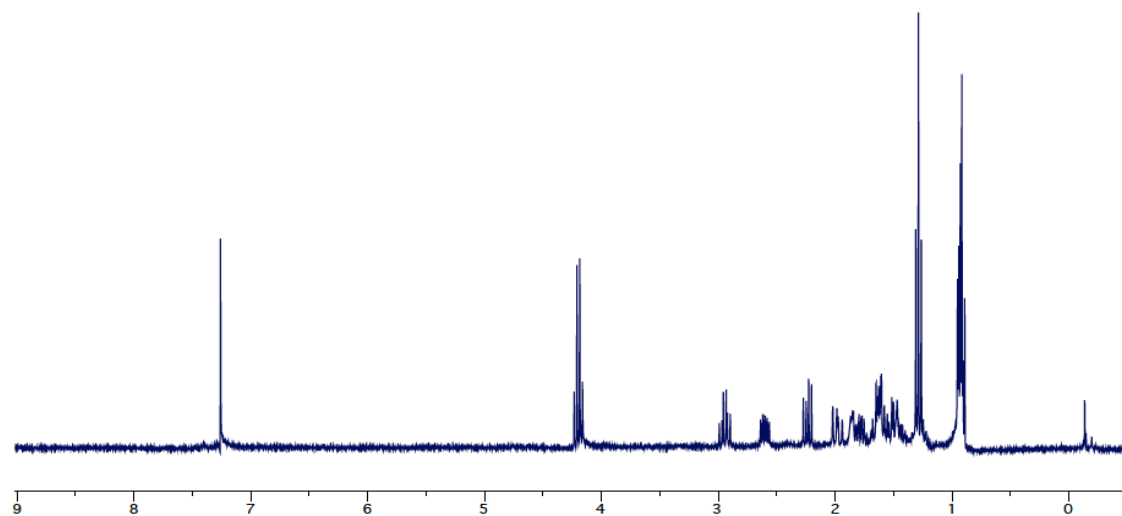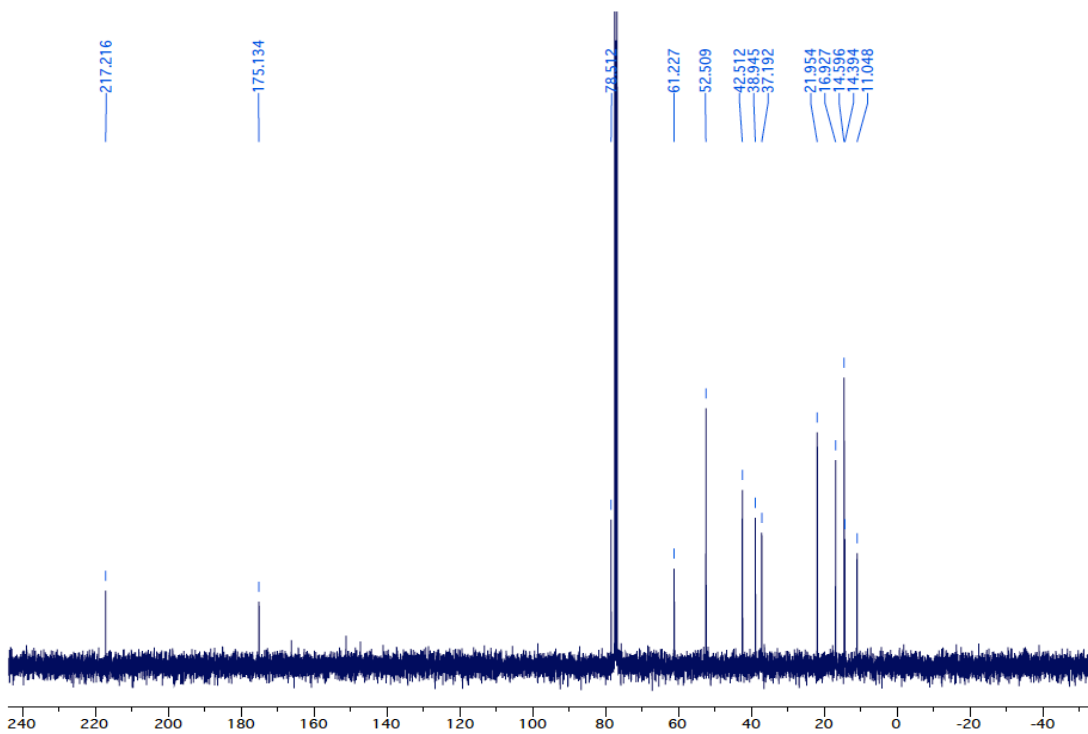

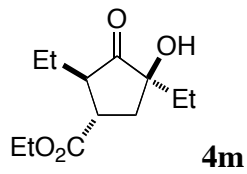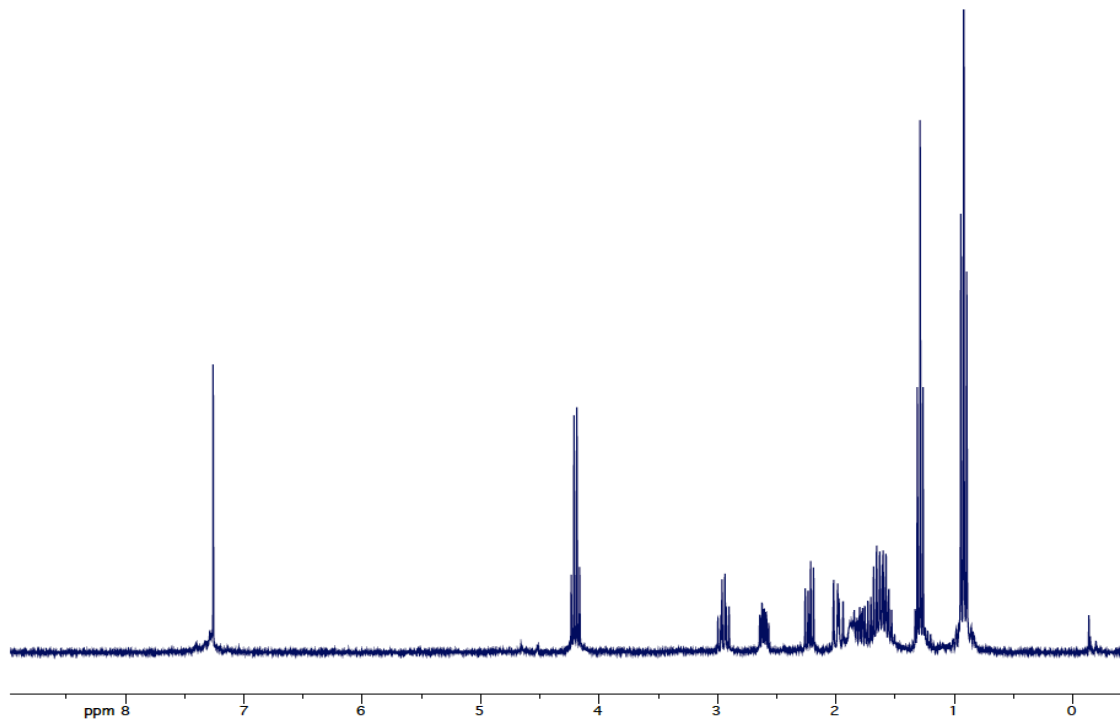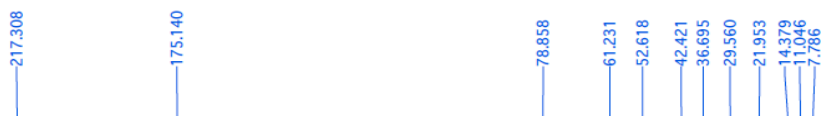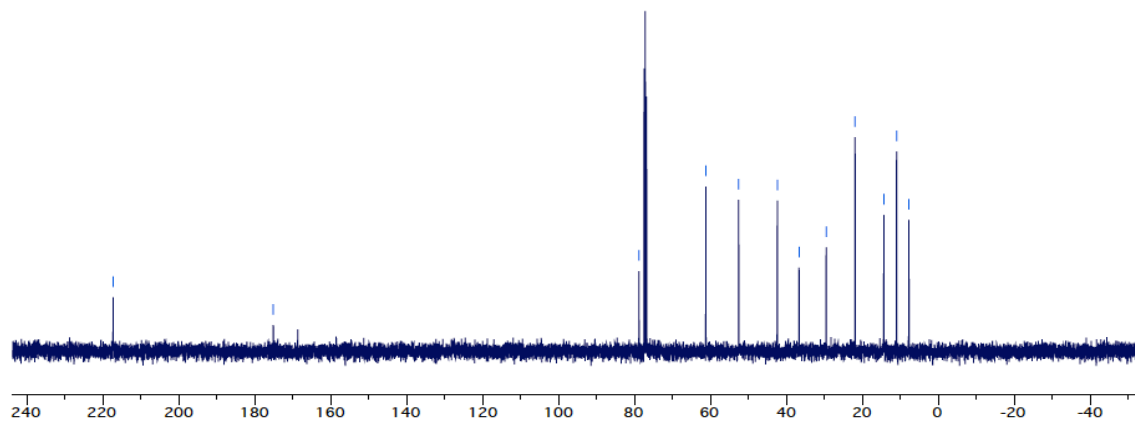

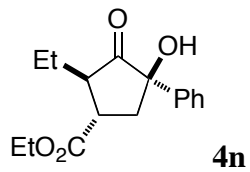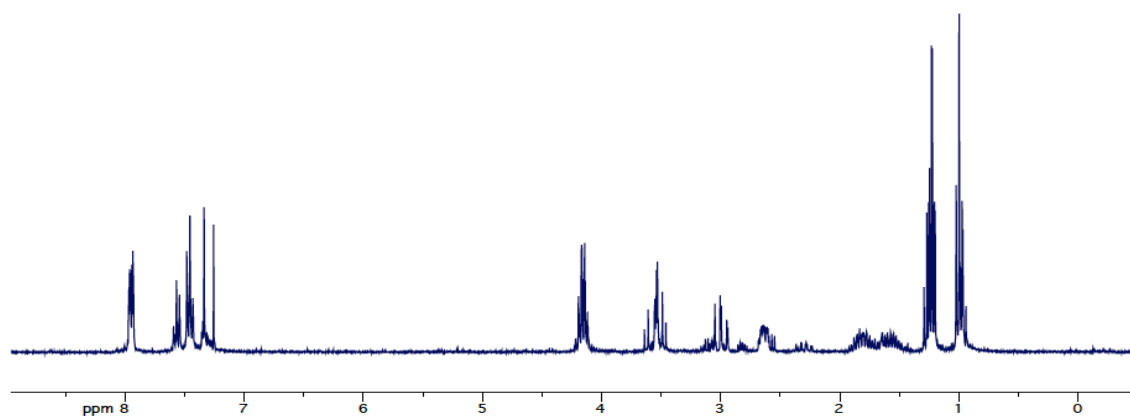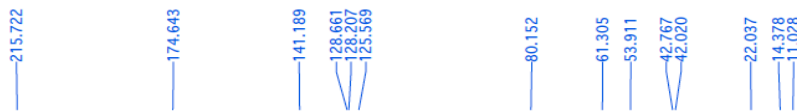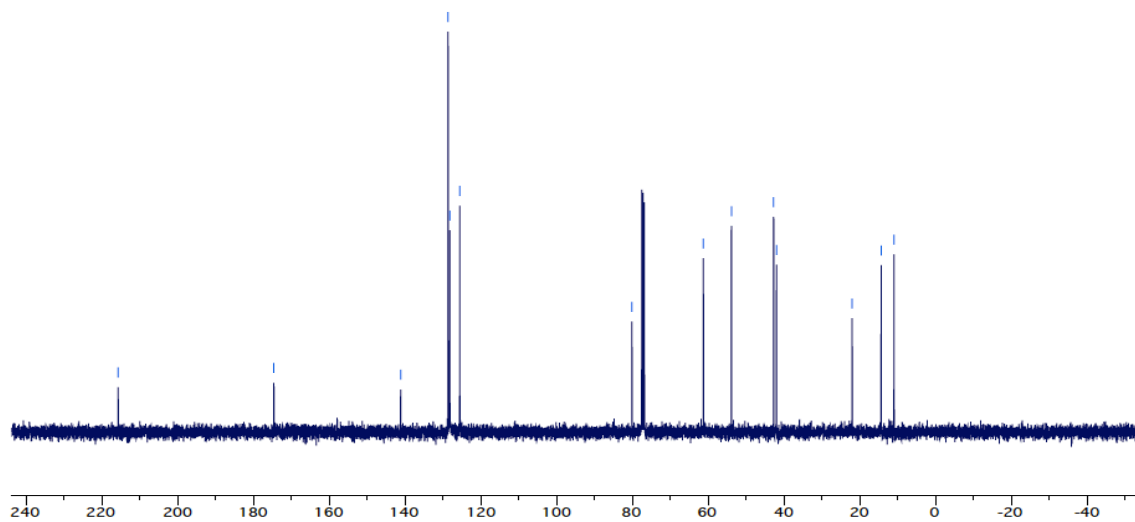

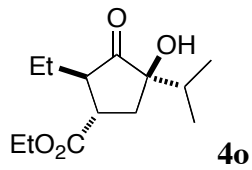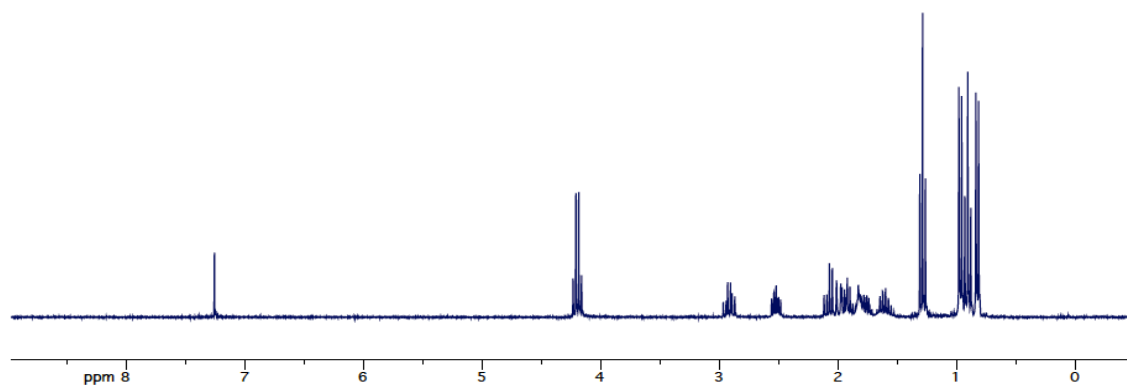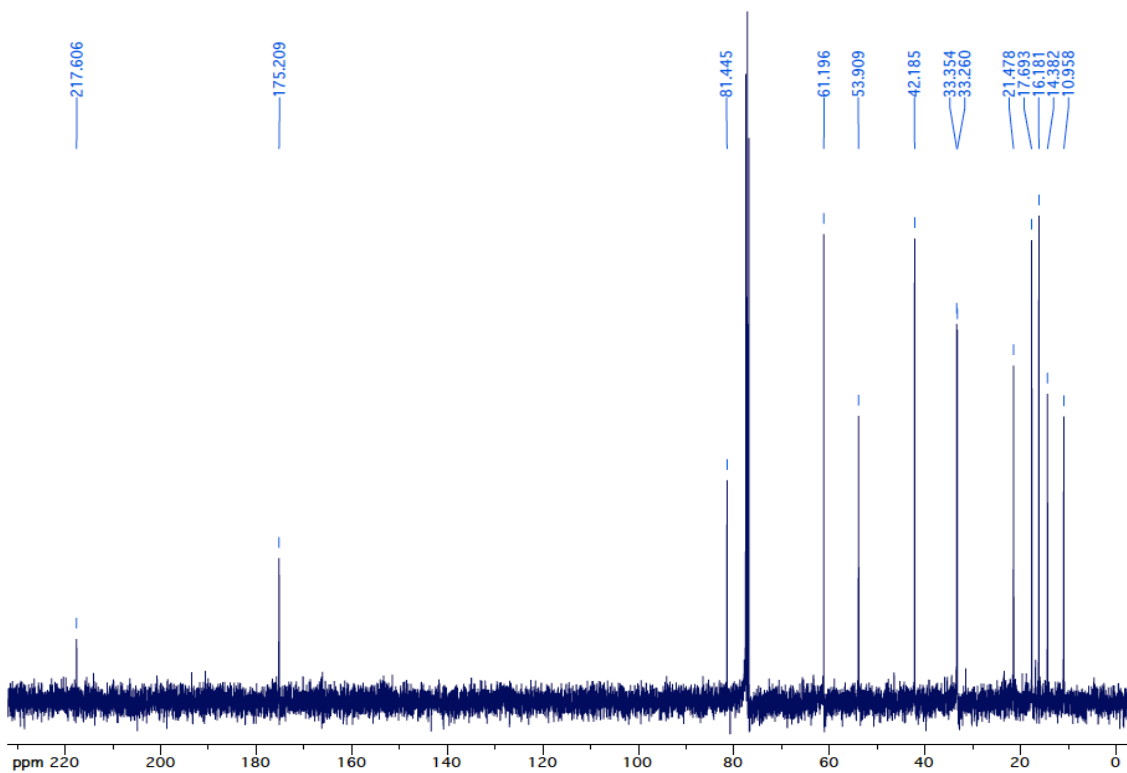

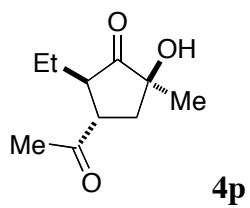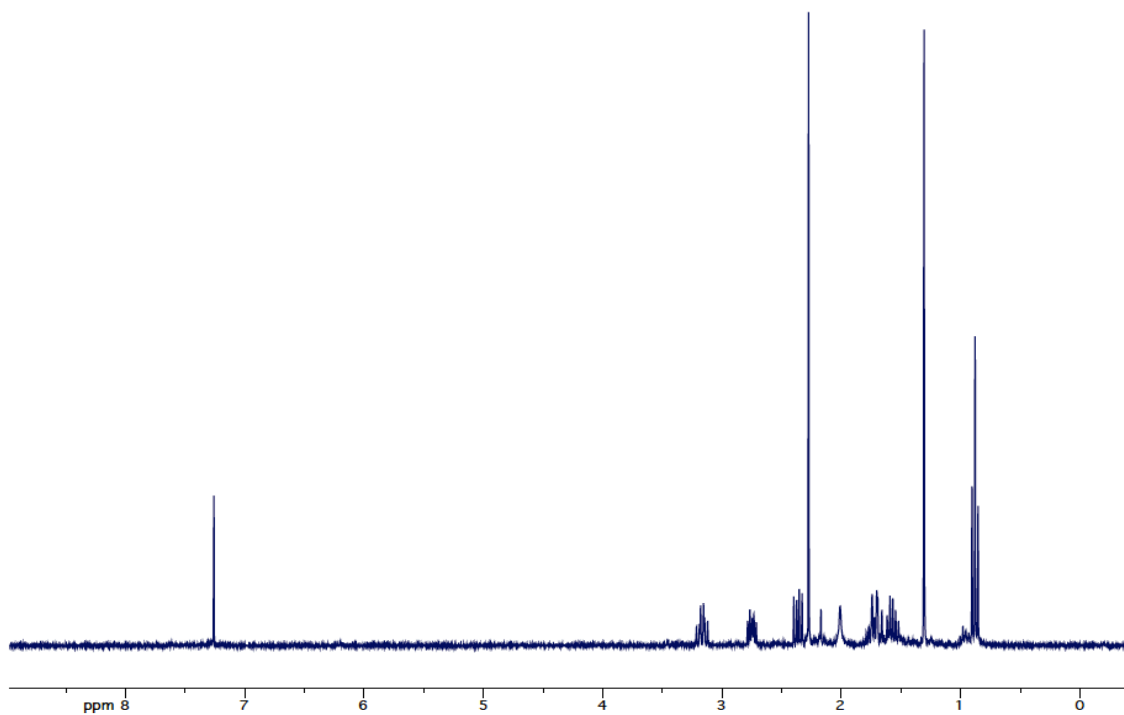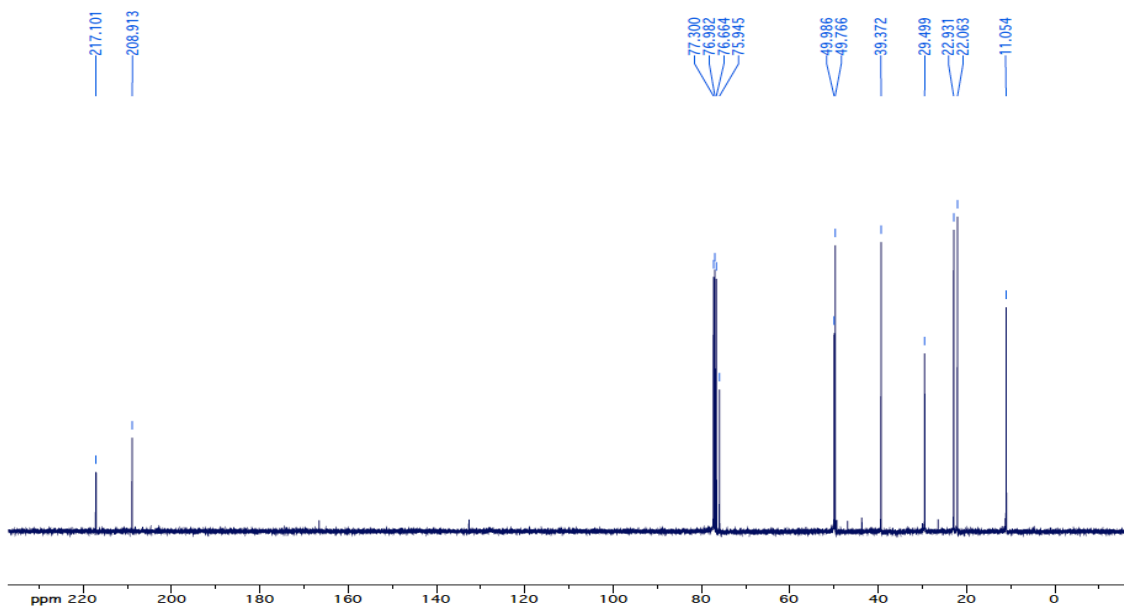

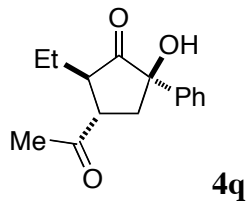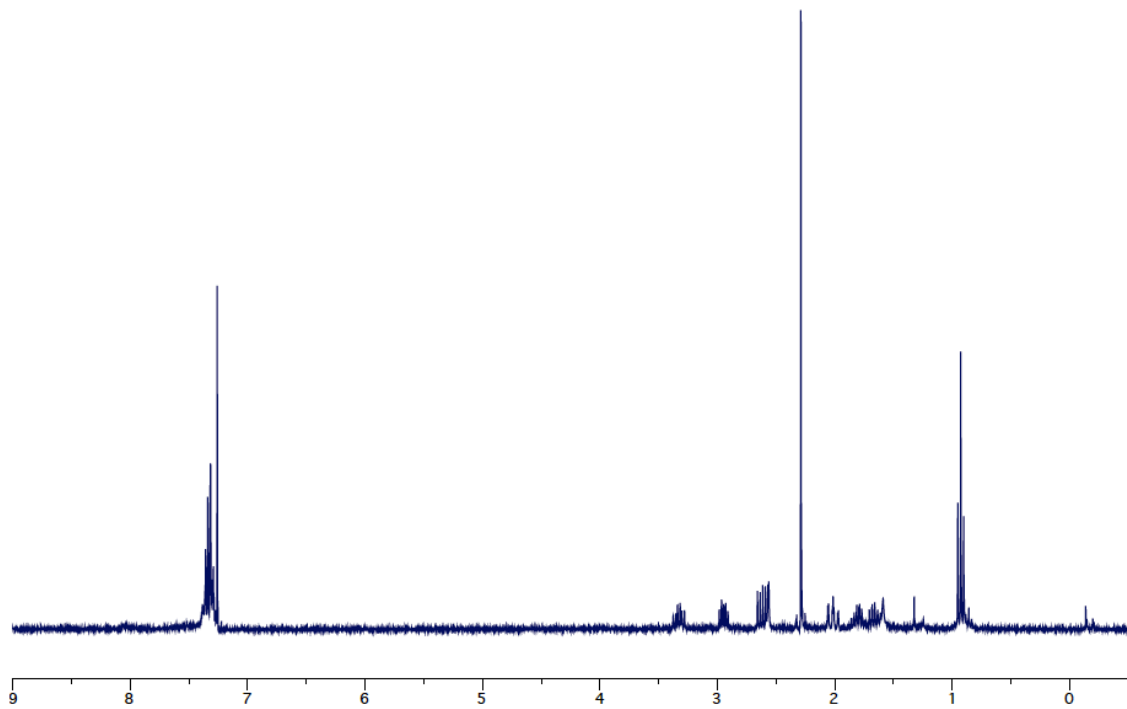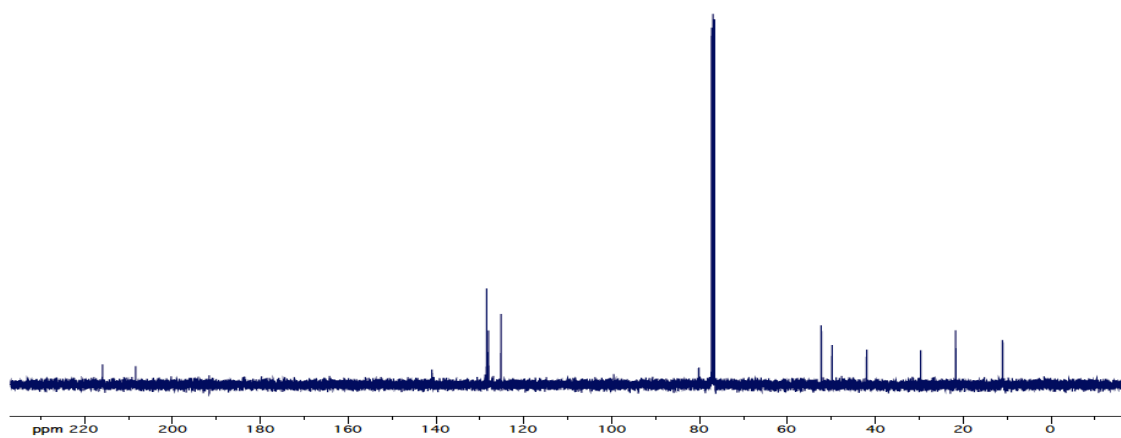

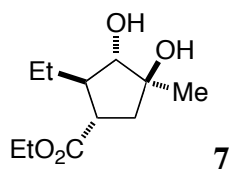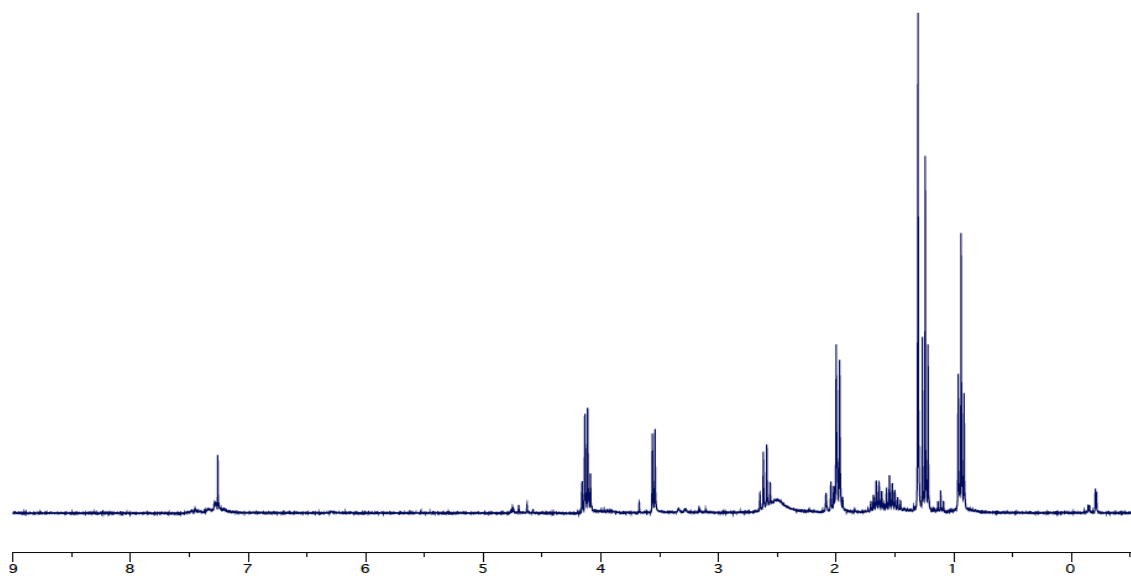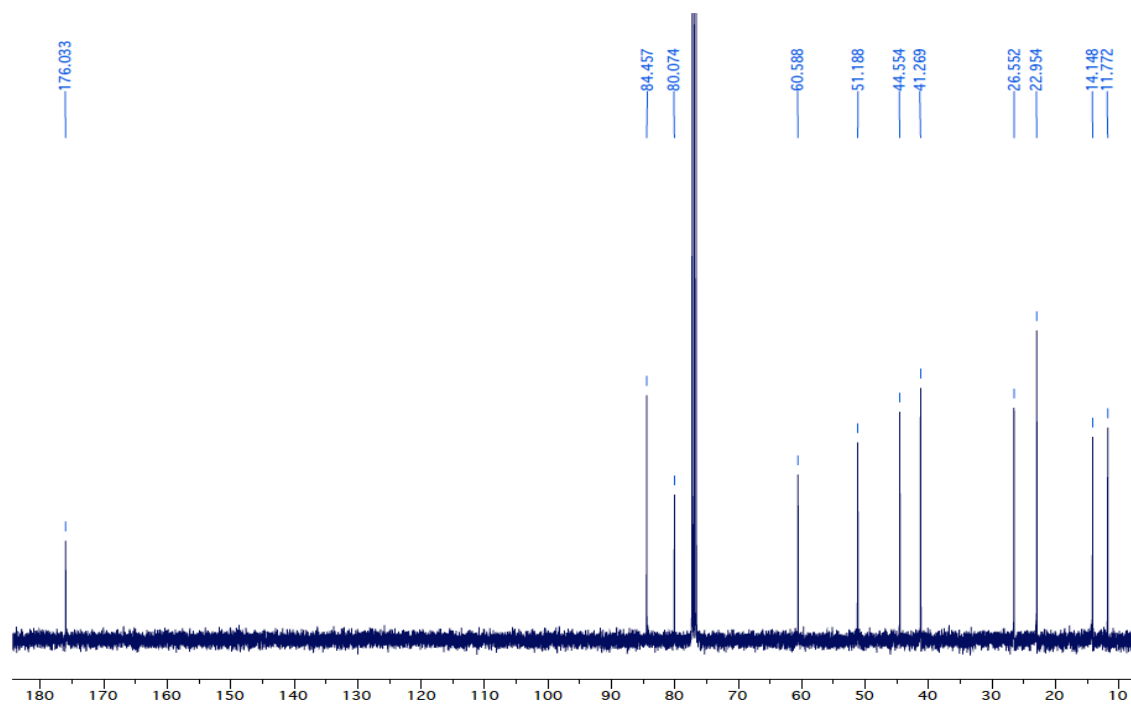

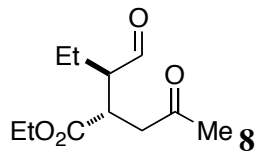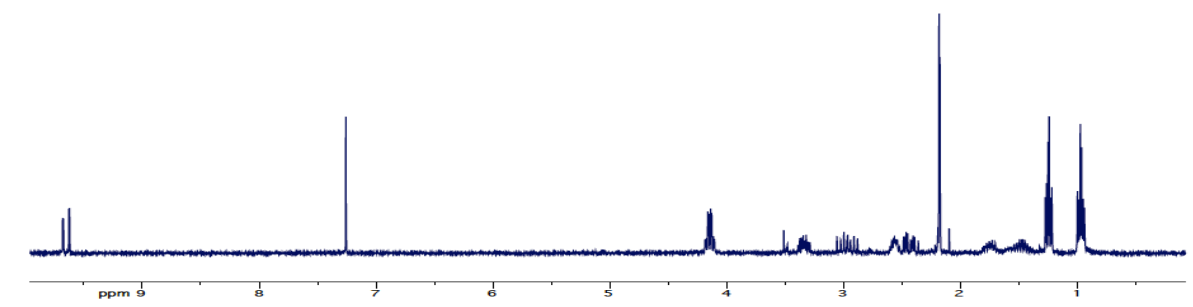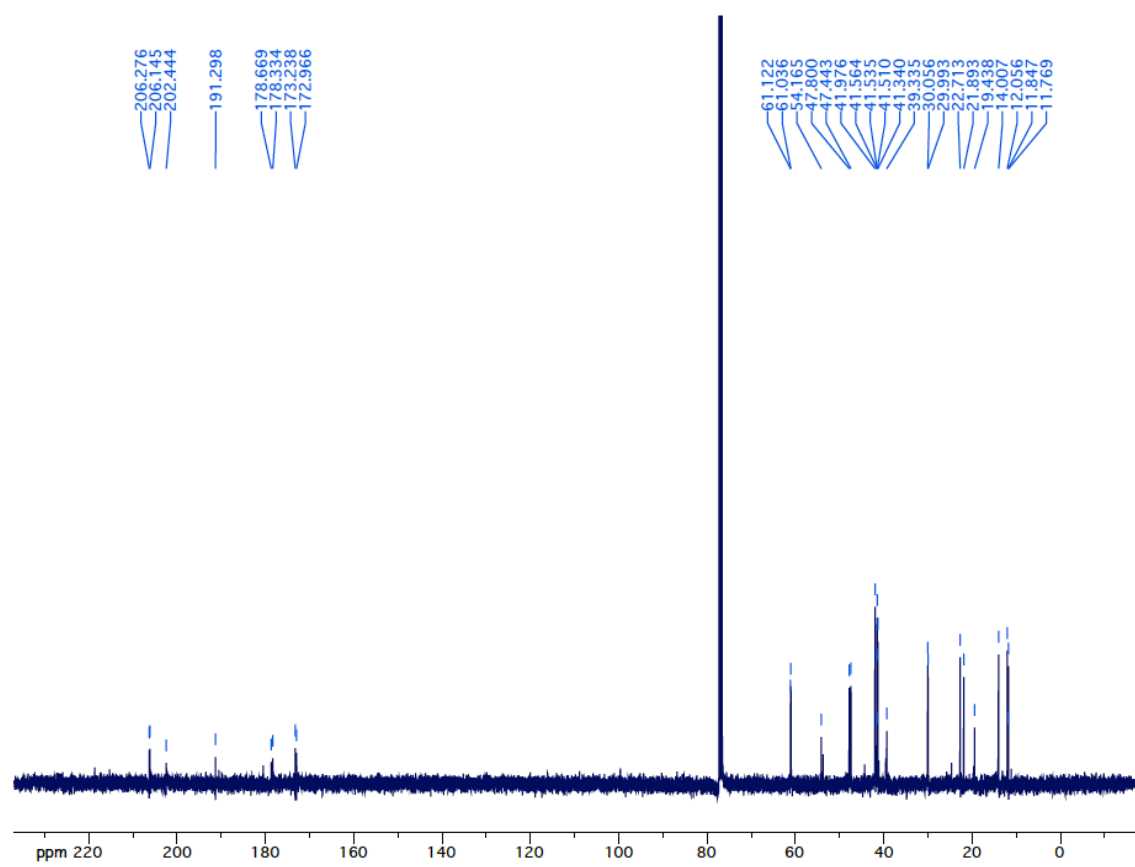



## GC and HPLC traces

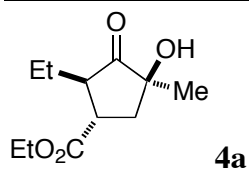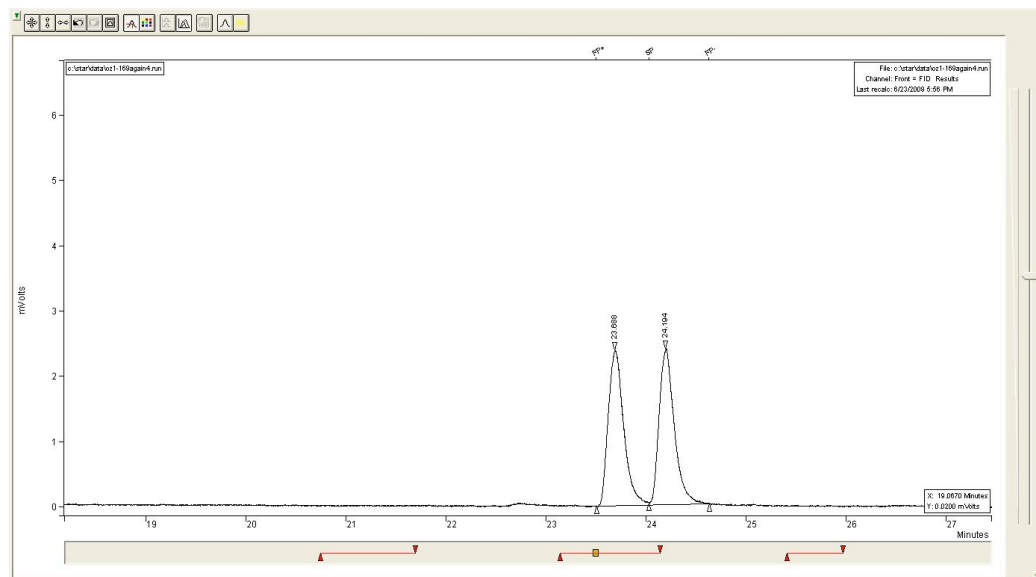

|       | Retention Time (min) | Area (mVolts*s) |
|-------|----------------------|-----------------|
| Peak1 | 23.688               | 25.6            |
| Peak2 | 24.194               | 25.1            |

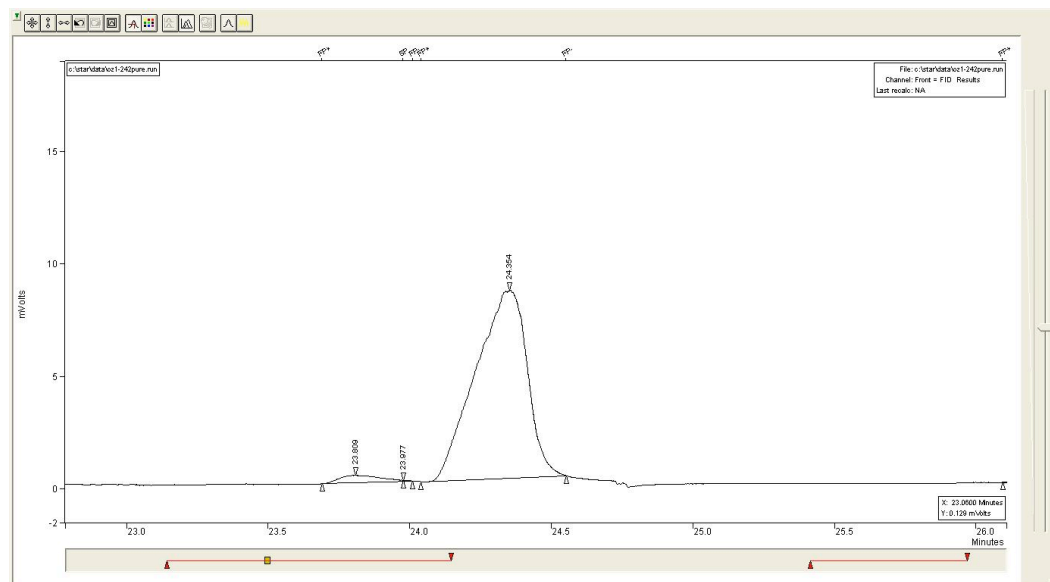

|       | Retention Time (min) | Area (mVolts*s) |
|-------|----------------------|-----------------|
| Peak1 | 23.631               | 9.8             |
| Peak2 | 24.224               | 168             |

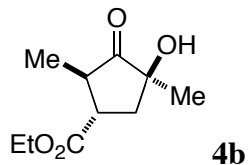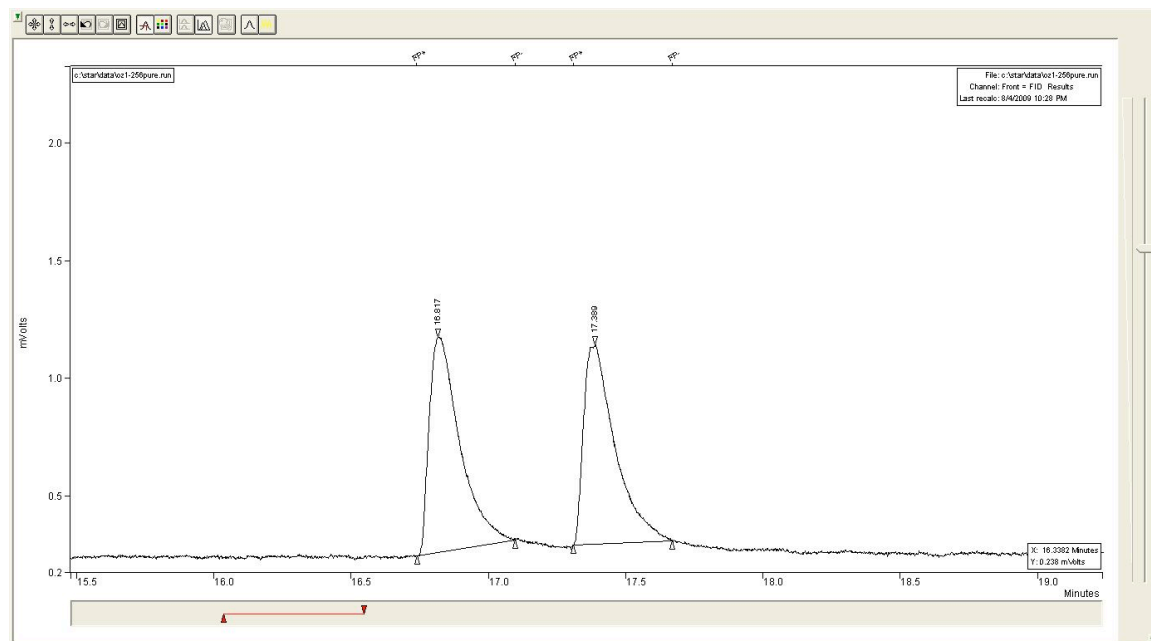

|       | Retention Time (min) | Area (mVolts*s) |
|-------|----------------------|-----------------|
| Peak1 | 16.817               | 7.08            |
| Peak2 | 17.389               | 6.79            |

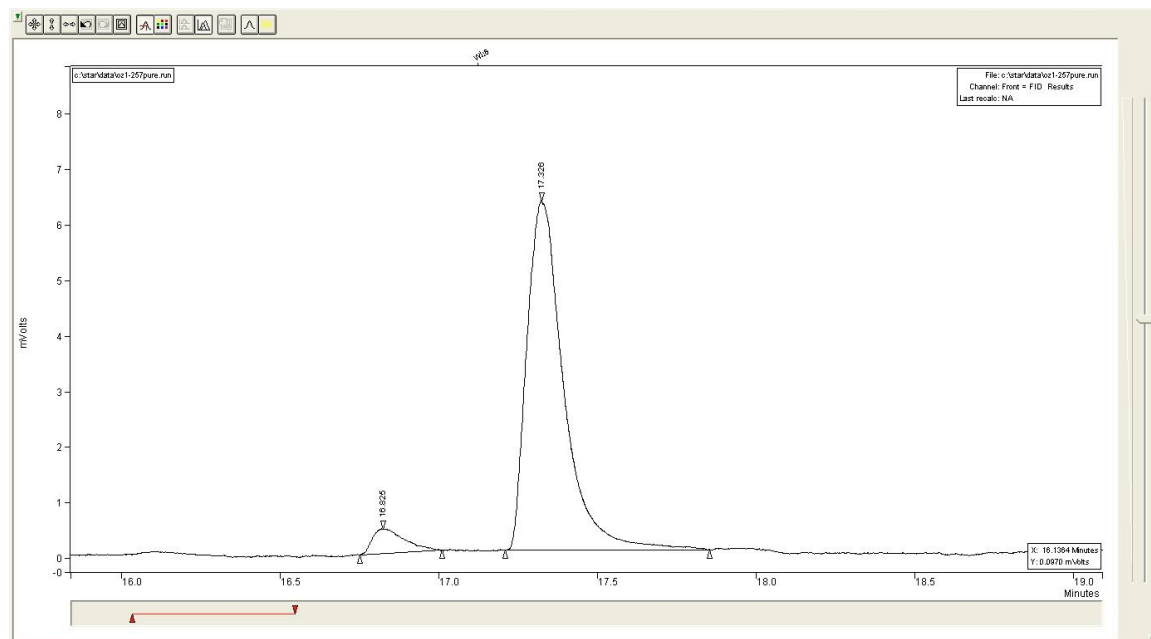

|       | Retention Time (min) | Area (mVolts*s) |
|-------|----------------------|-----------------|
| Peak1 | 16.825               | 3.13            |
| Peak2 | 17.326               | 50.7            |

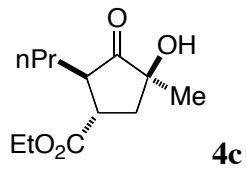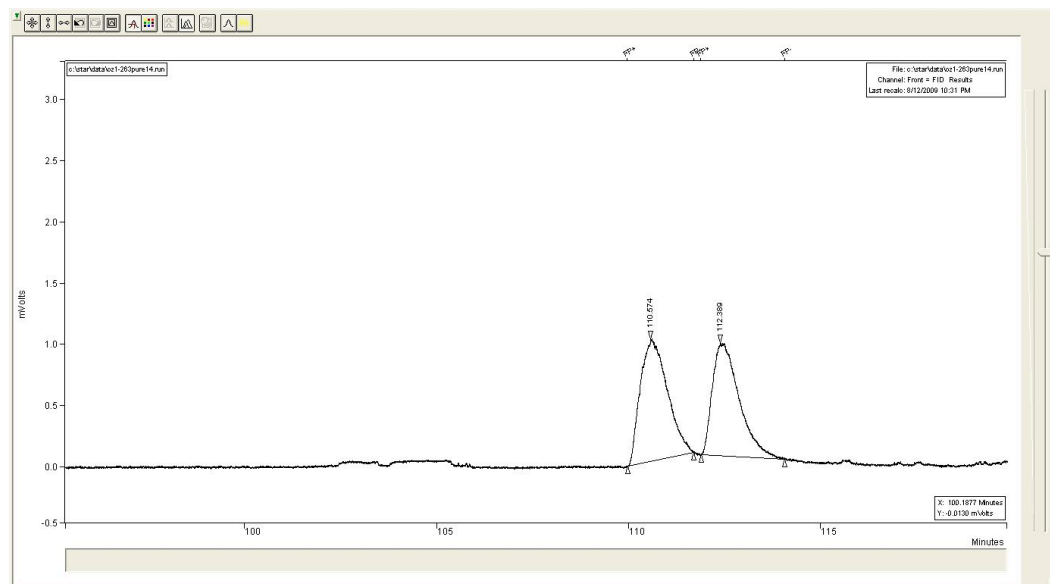

|       | Retention Time (min) | Area (mVolts*s) |
|-------|----------------------|-----------------|
| Peak1 | 110.57               | 45              |
| Peak2 | 112.389              | 44.6            |

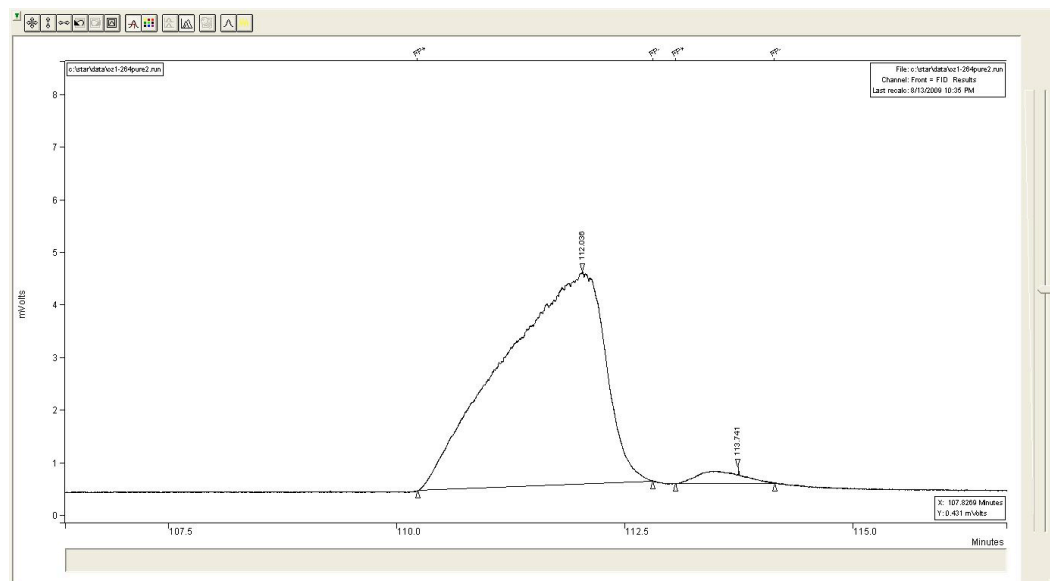

|       | Retention Time (min) | Area (mVolts*s) |
|-------|----------------------|-----------------|
| Peak1 | 113.036              | 313             |
| Peak2 | 113.741              | 7.49            |

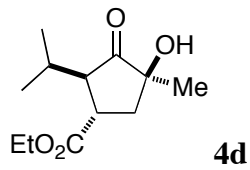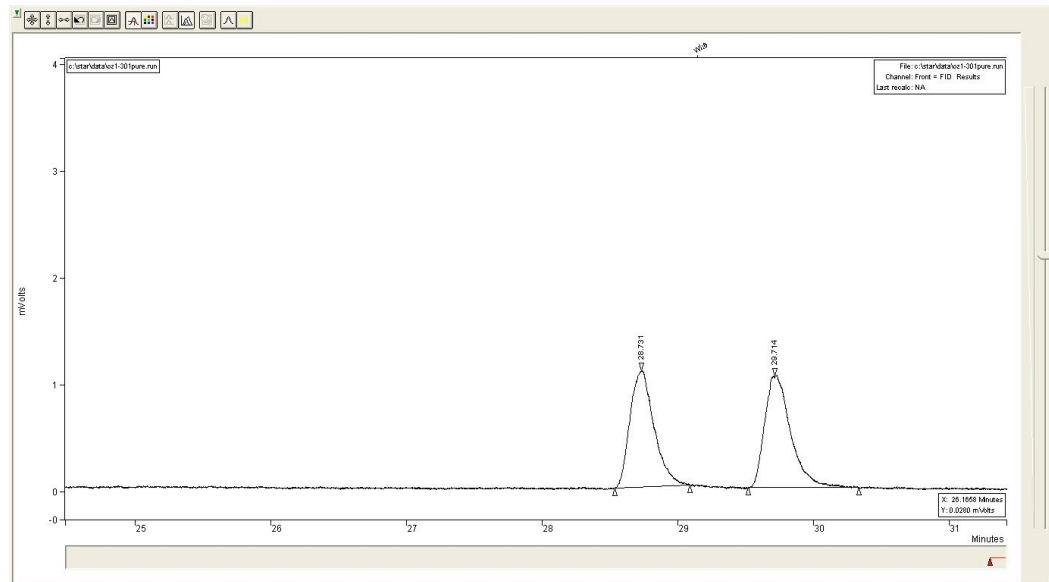

|       | Retention Time (min) | Area (mVolts*s) |
|-------|----------------------|-----------------|
| Peak1 | 28.731               | 13.5            |
| Peak2 | 29.714               | 14              |

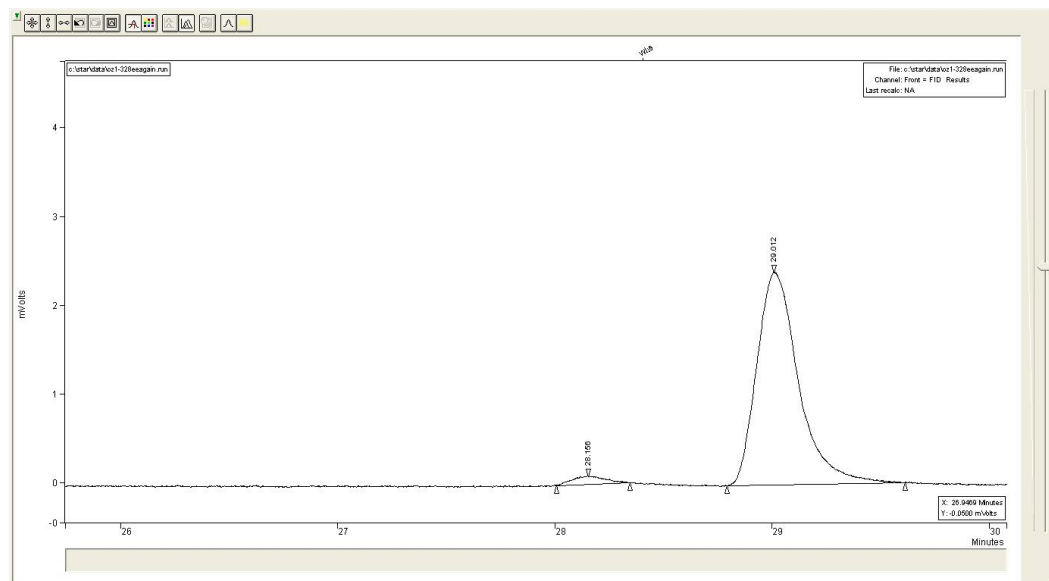

|       | Retention Time (min) | Area (mVolts*s) |
|-------|----------------------|-----------------|
| Peak1 | 28.156               | 0.978           |
| Peak2 | 29.012               | 32              |

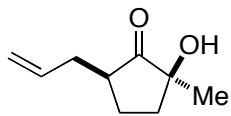

EtO<sub>2</sub>C **4e**

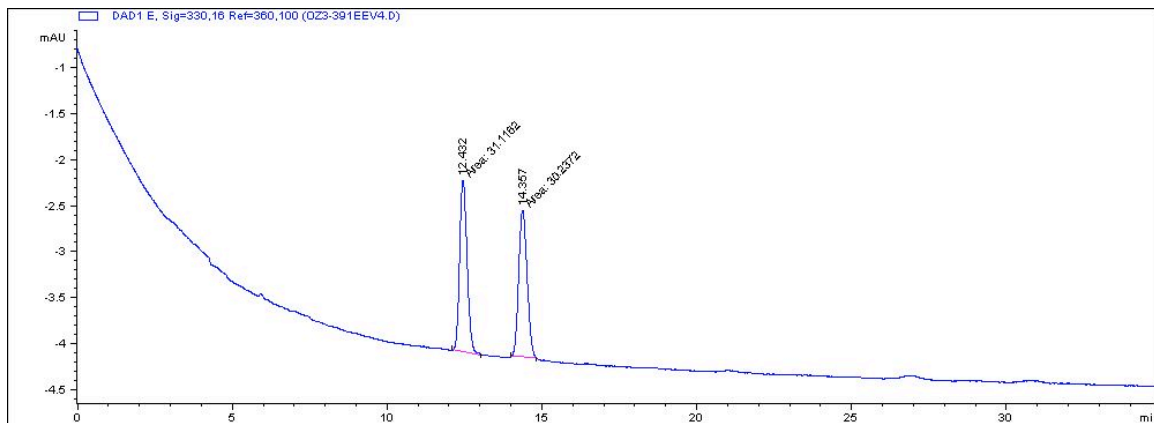

|       | Retention Time (min) | Area (mAu*s) |
|-------|----------------------|--------------|
| Peak1 | 12.432               | 31.1162      |
| Peak2 | 14.357               | 30.2373      |

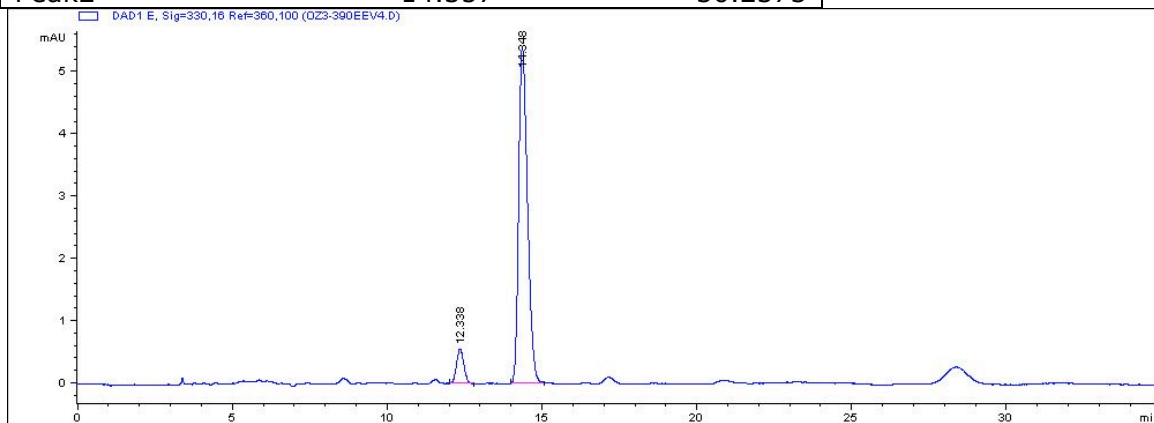

|       | Retention Time (min) | Area (mAu*s) |
|-------|----------------------|--------------|
| Peak1 | 12.338               | 8.9438       |
| Peak2 | 14.346               | 107.83       |

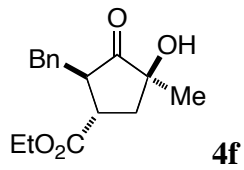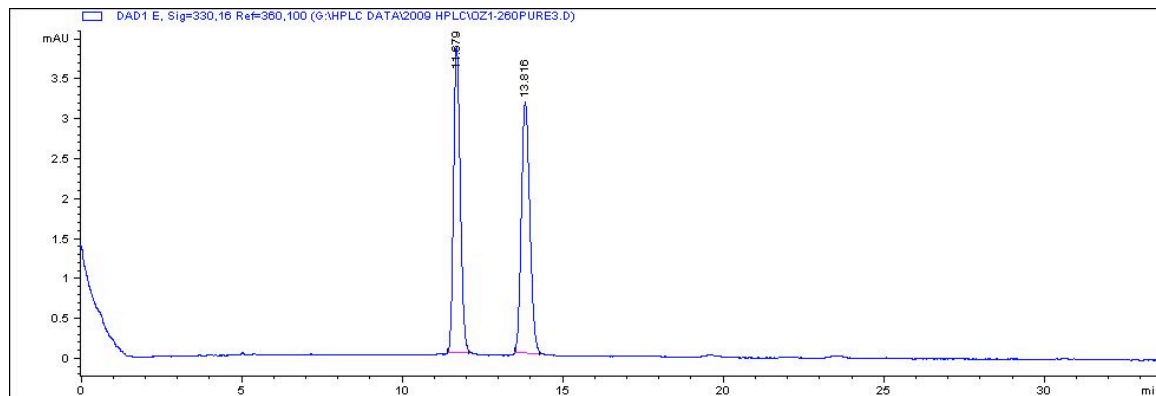

|       | Retention Time (min) | Area (mAU*s) |
|-------|----------------------|--------------|
| Peak1 | 11.679               | 56.1959      |
| Peak2 | 13.816               | 57.3378      |

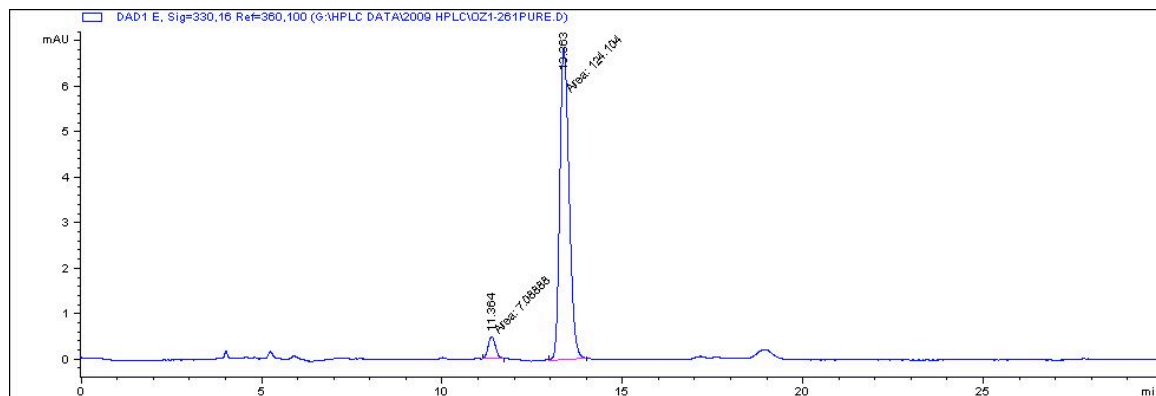

|       | Retention Time (min) | Area (mAu*s) |
|-------|----------------------|--------------|
| Peak1 | 11.363               | 6.8983       |
| Peak2 | 13.363               | 123.133      |

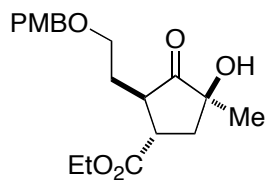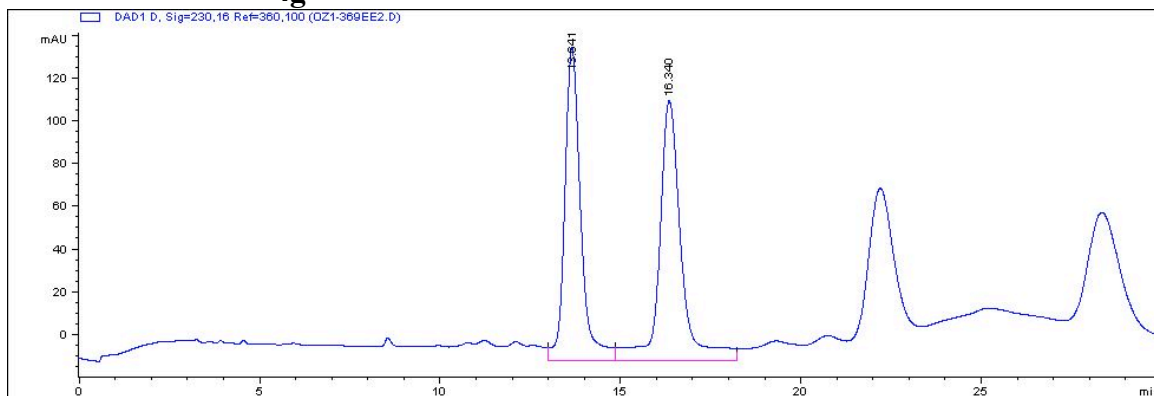

|       | Retention Time (min) | Area (mAu*s) |
|-------|----------------------|--------------|
| Peak1 | 13.641               | 3843.1       |
| Peak2 | 16.34                | 3869.4       |

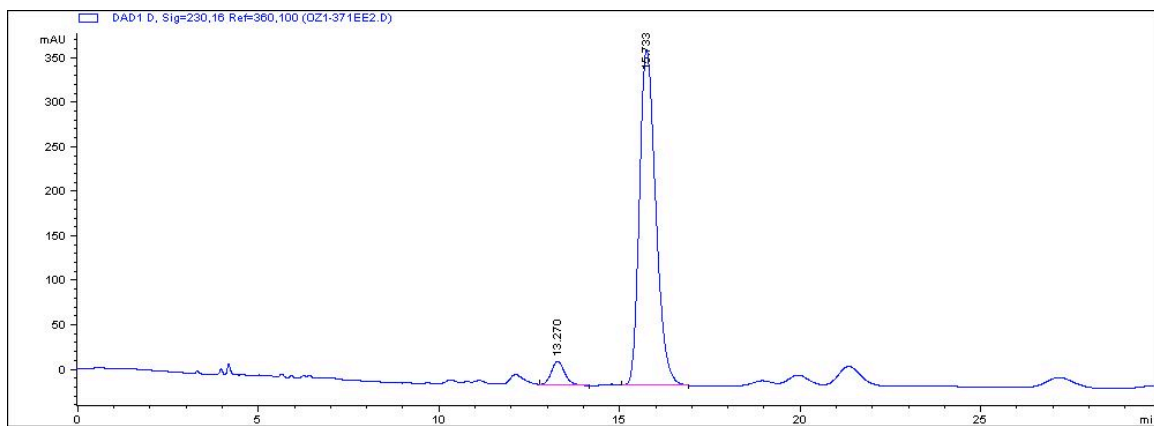

|       | Retention Time (min) | Area (mAu*s) |
|-------|----------------------|--------------|
| Peak1 | 13.27                | 692.8        |
| Peak2 | 15.733               | 11850.1      |

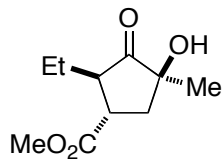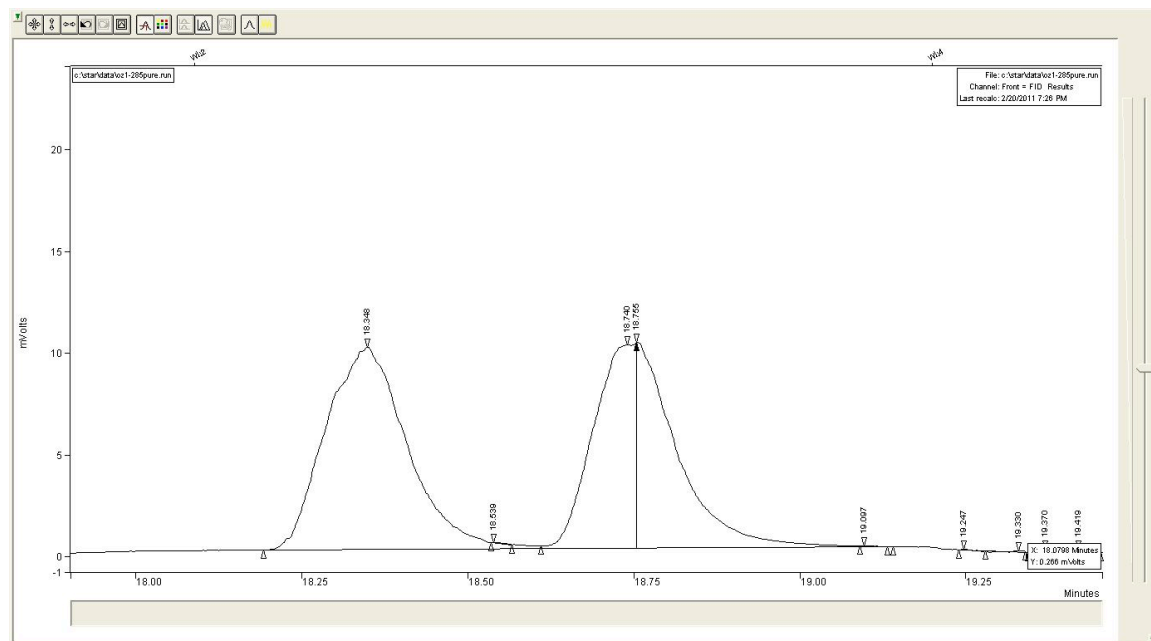

|       | Retention Time (min) | Area (mVolts*s) |
|-------|----------------------|-----------------|
| Peak1 | 18.348               | 81.4            |
| Peak2 | 18.751               | 84              |

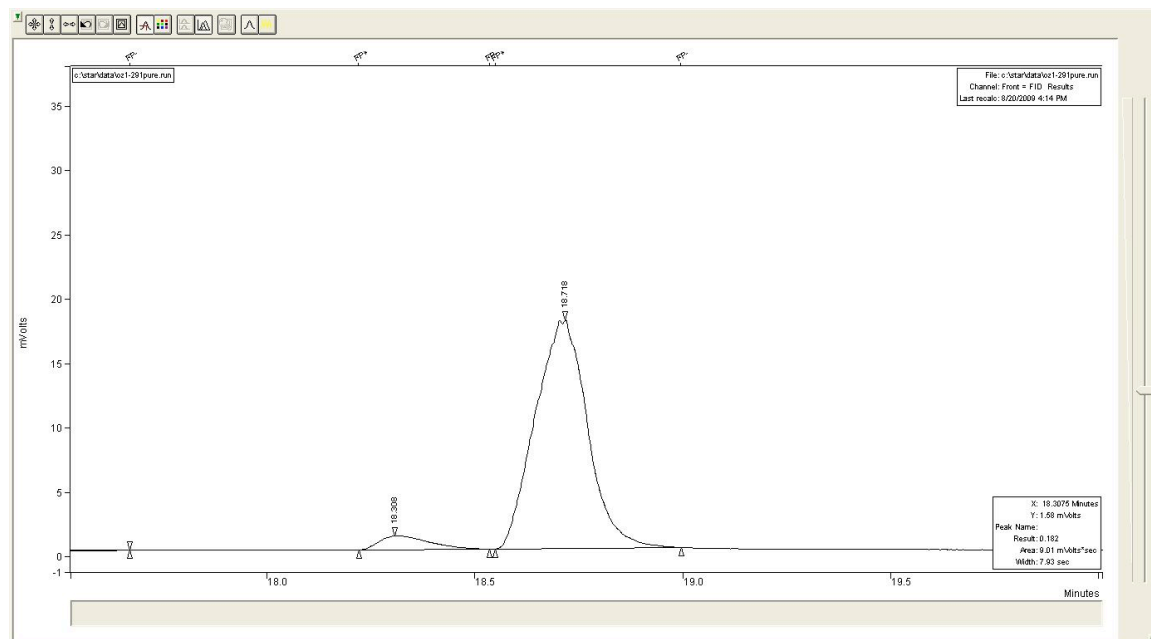

|       | Retention Time (min) | Area (mVolts*s) |
|-------|----------------------|-----------------|
| Peak1 | 18.308               | 9.01            |
| Peak2 | 18.718               | 155             |



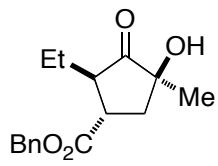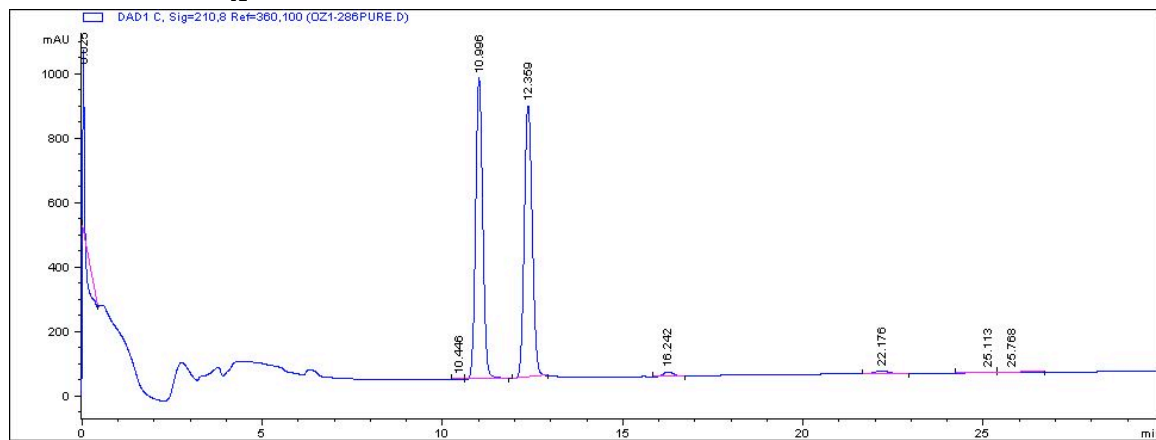

|       | Retention Time (min) | Area (mAU*s) |
|-------|----------------------|--------------|
| Peak1 | 10.996               | 12892.1      |
| Peak2 | 12.359               | 12733.8      |

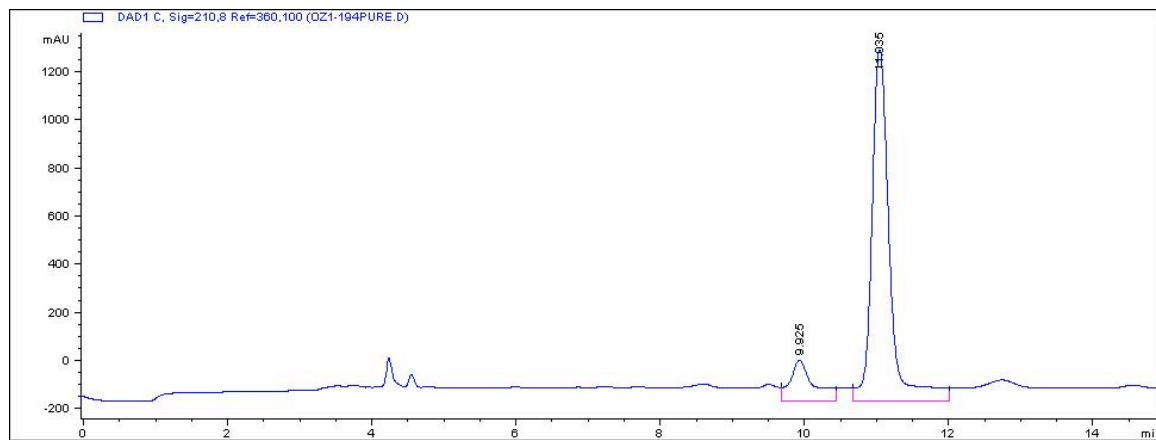

|       | Retention Time (min) | Area (mAU*s) |
|-------|----------------------|--------------|
| Peak1 | 9.925                | 1633.68      |
| Peak2 | 11.035               | 20446.5      |

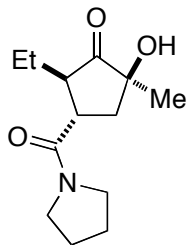

4j

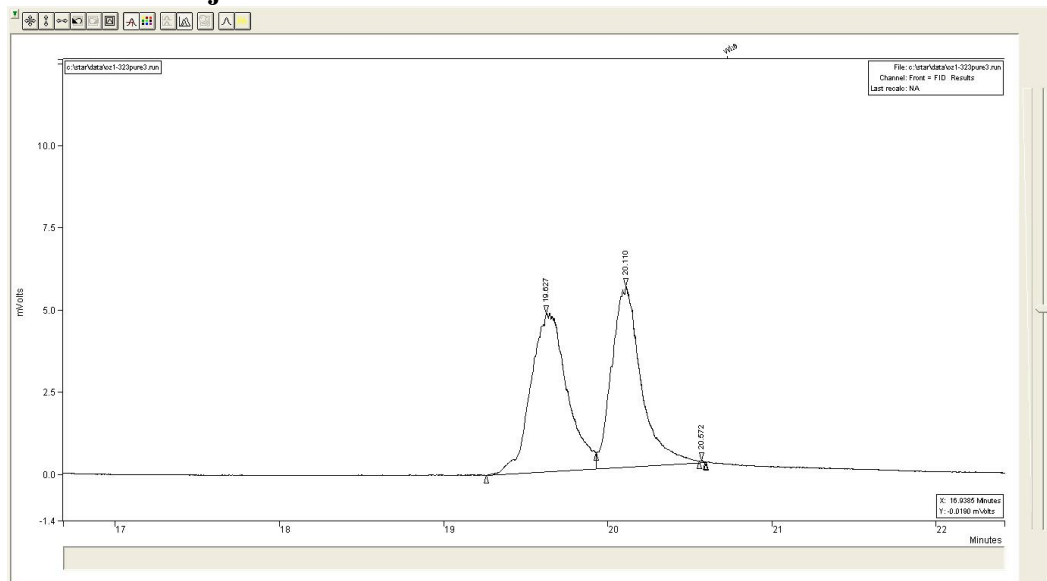

|       | Retention Time (min) | Area (mVolts*s) |
|-------|----------------------|-----------------|
| Peak1 | 19.627               | 70              |
| Peak2 | 20.11                | 68.7            |

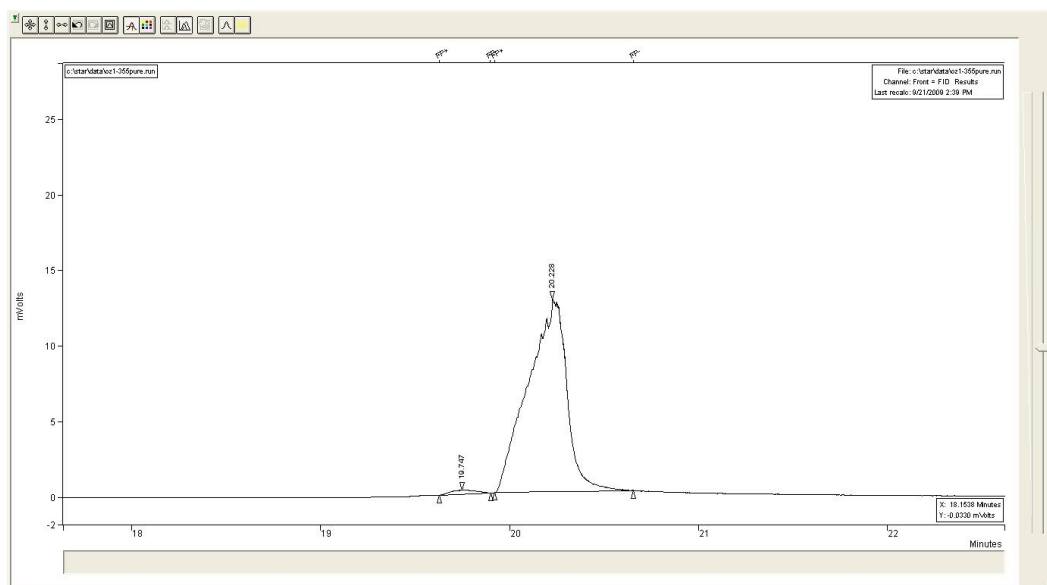

|       | Retention Time (min) | Area (mVolts*s) |
|-------|----------------------|-----------------|
| Peak1 | 19.747               | 2.54            |
| Peak2 | 20.228               | 180             |

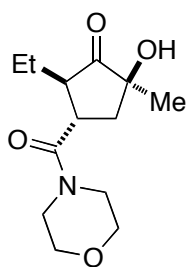

4k

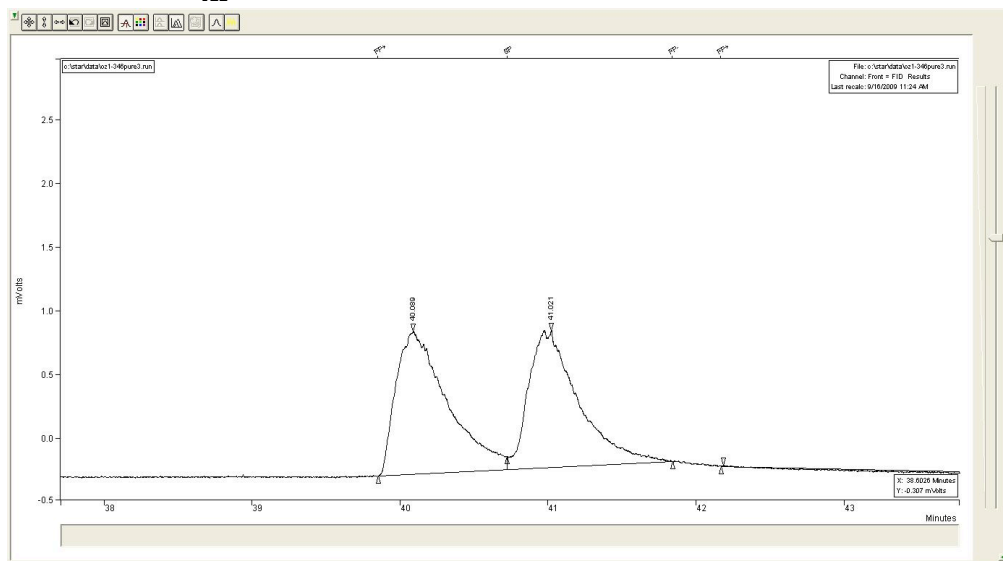

|       | Retention Time (min) | Area (mVolts*s) |
|-------|----------------------|-----------------|
| Peak1 | 40.089               | 27              |
| Peak2 | 41.021               | 25.2            |

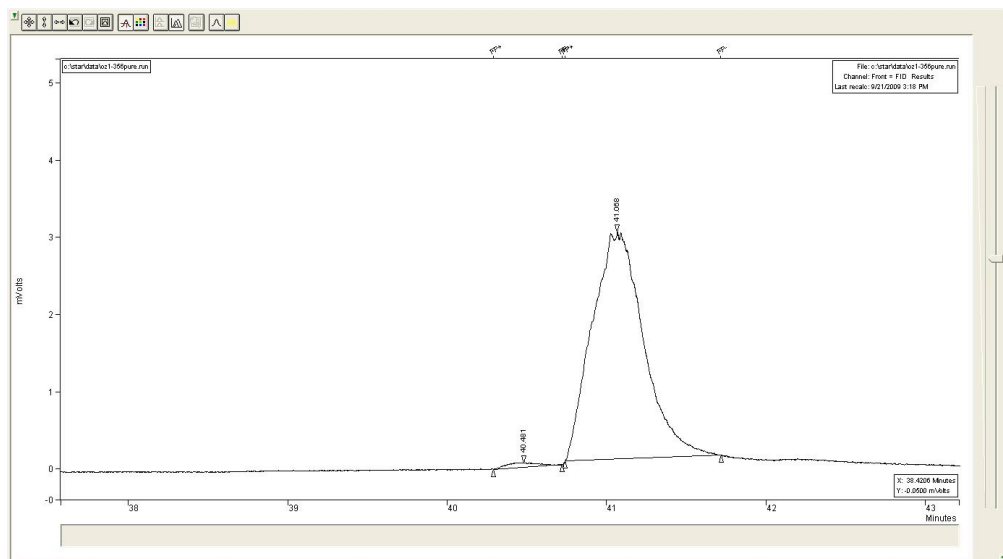

|       | Retention Time (min) | Area (mVolts*s) |
|-------|----------------------|-----------------|
| Peak1 | 40.481               | 0.801           |
| Peak2 | 41.068               | 66              |

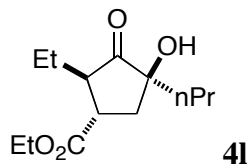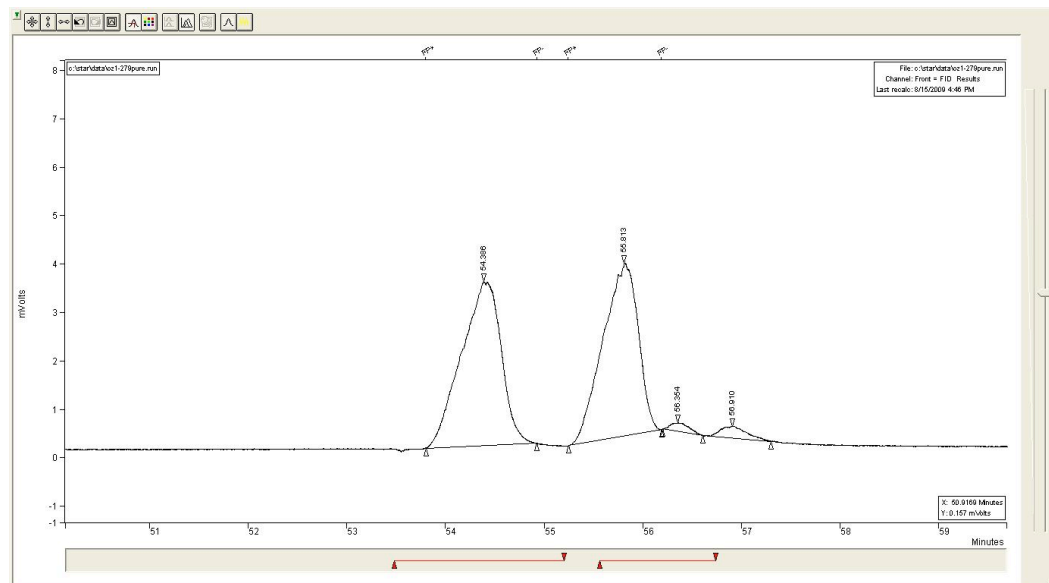

|       | Retention Time (min) | Area (mVolts*s) |
|-------|----------------------|-----------------|
| Peak1 | 54.386               | 94.9            |
| Peak2 | 55.813               | 88.6            |

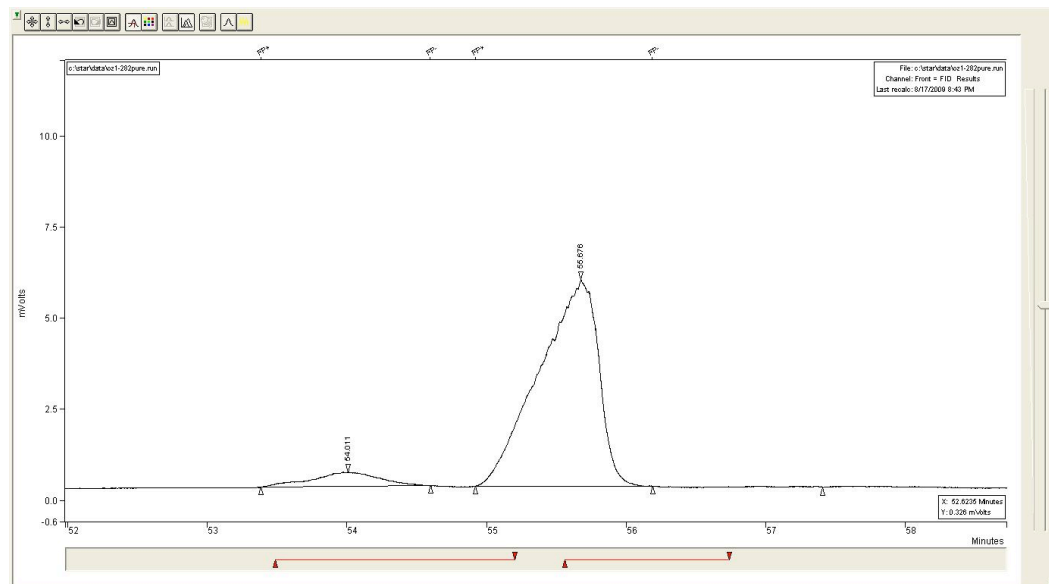

|       | Retention Time (min) | Area (mVolts*s) |
|-------|----------------------|-----------------|
| Peak1 | 54.011               | 13.3            |
| Peak2 | 55.676               | 167             |

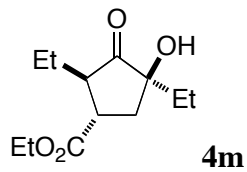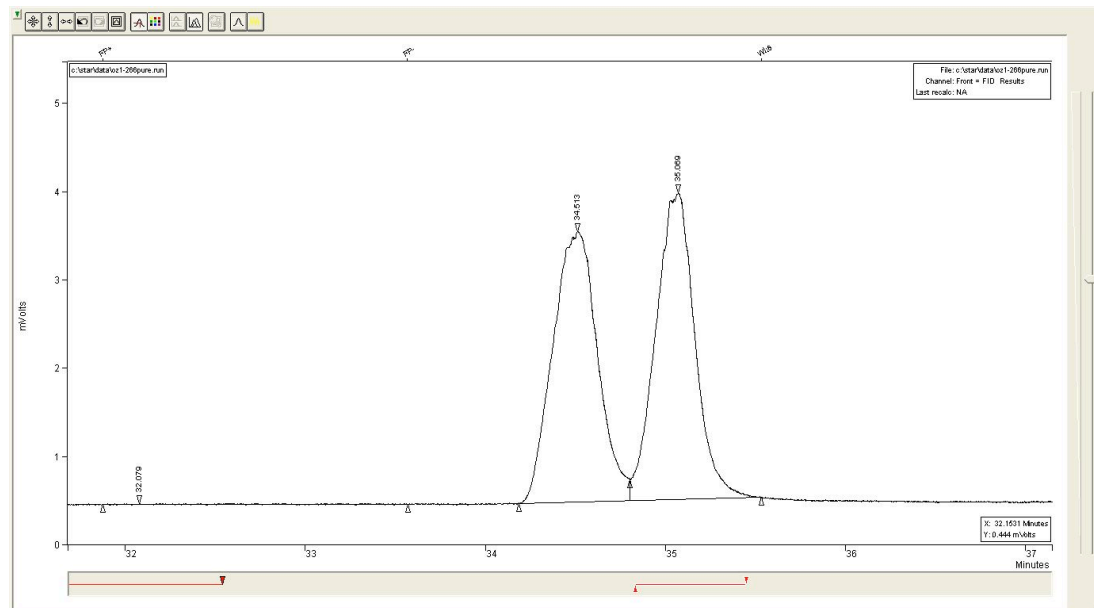

|       | Retention Time (min) | Area (mVolts*s) |
|-------|----------------------|-----------------|
| Peak1 | 34.513               | 53              |
| Peak2 | 35.069               | 52.6            |

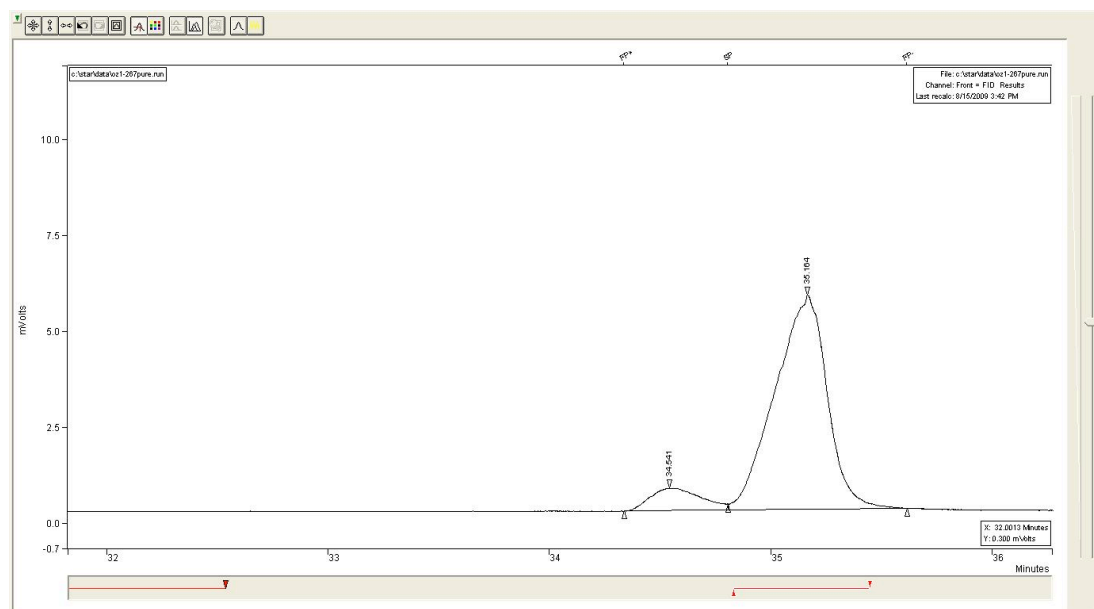

|       | Retention Time (min) | Area (mVolts*s) |
|-------|----------------------|-----------------|
| Peak1 | 34.541               | 9.31            |
| Peak2 | 35.164               | 91.1            |

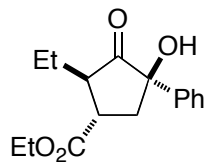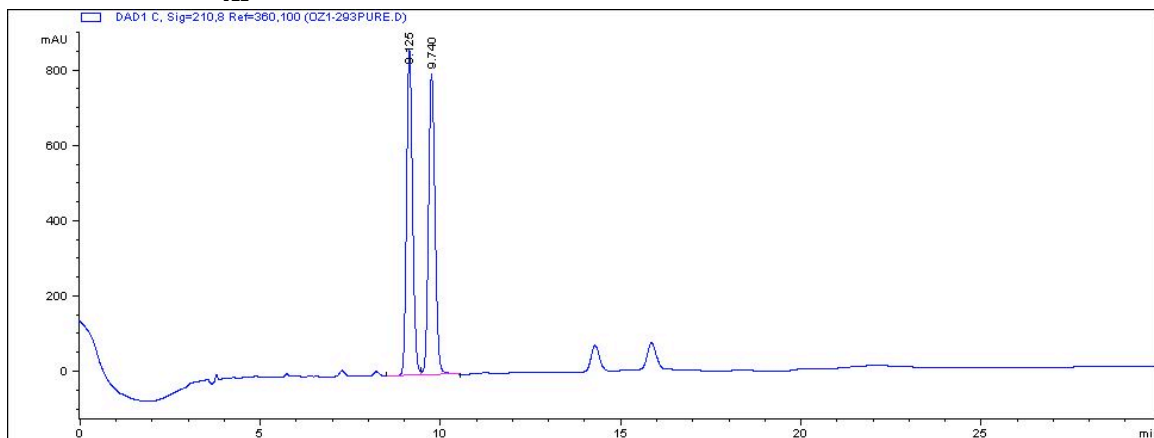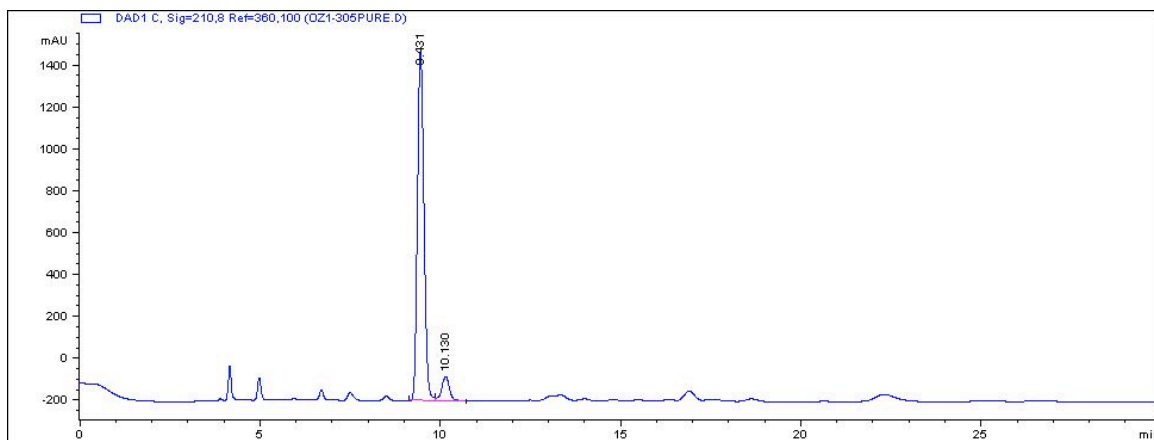

|       | Retention Time (min) | Area (mAU*s) |
|-------|----------------------|--------------|
| Peak1 | 9.431                | 5412.71      |
| Peak2 | 10.14                | 492.78       |

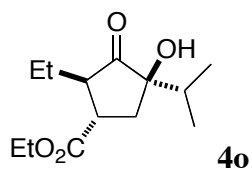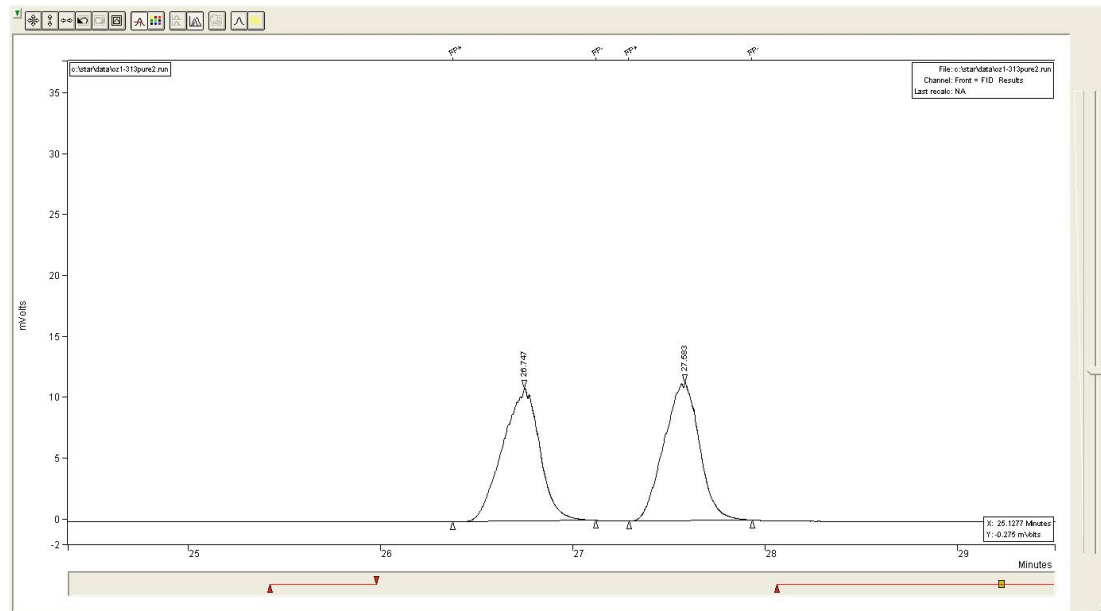

|       | Retention Time (min) | Area (mVolts*s) |
|-------|----------------------|-----------------|
| Peak1 | 26.747               | 146             |
| Peak2 | 27.583               | 145             |

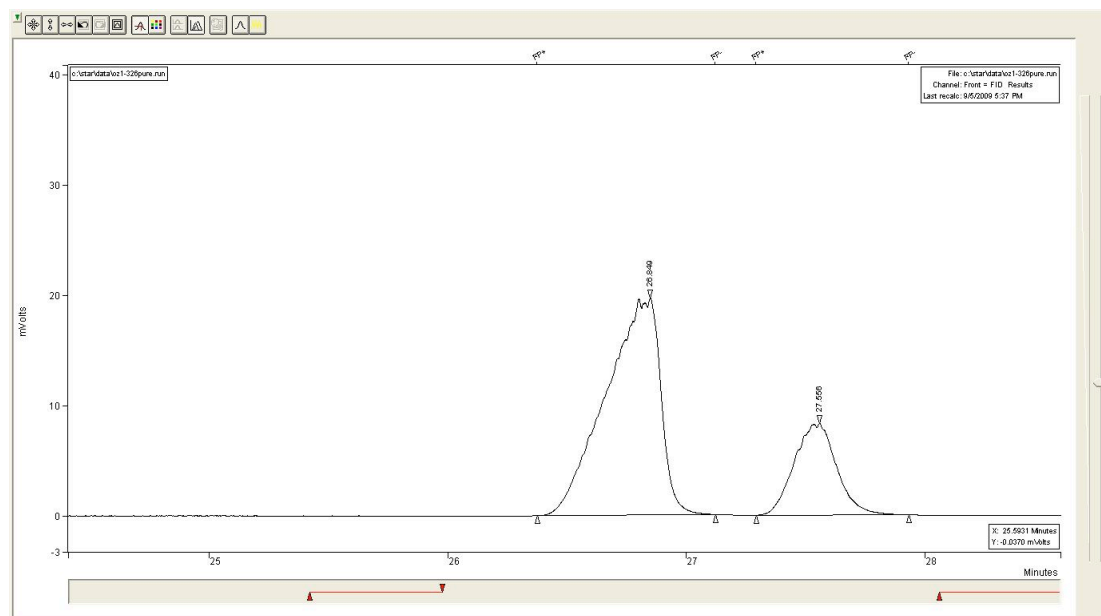

|       | Retention Time (min) | Area (mVolts*s) |
|-------|----------------------|-----------------|
| Peak1 | 26.849               | 314             |
| Peak2 | 27.556               | 101             |

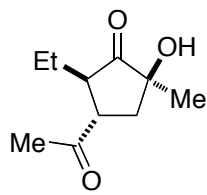

**4p**

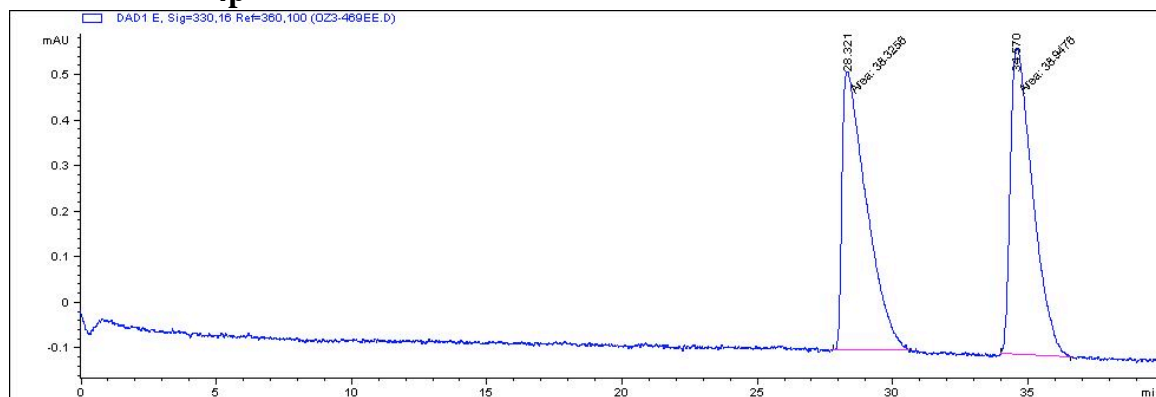

|       | Retention Time (min) | Area (mAu*s) |
|-------|----------------------|--------------|
| Peak1 | 28.319               | 38.6         |
| Peak2 | 34.58                | 38.6         |

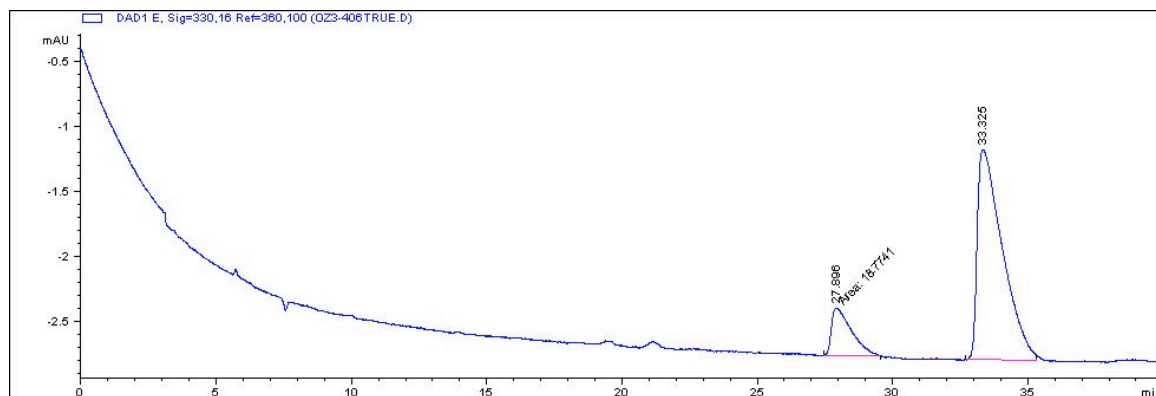

|       | Retention Time (min) | Area (mAu*s) |
|-------|----------------------|--------------|
| Peak1 | 27.896               | 19.4485      |
| Peak2 | 33.316               | 105.36       |



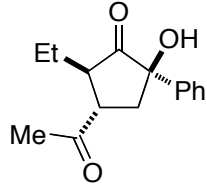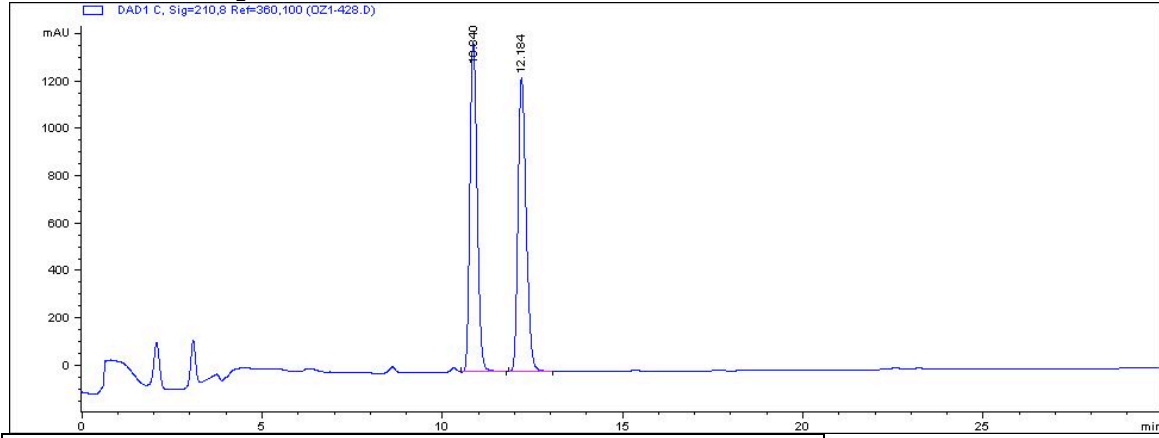

|       | Retention Time (min) | Area (mAu*s) |
|-------|----------------------|--------------|
| Peak1 | 10.841               | 5912         |
| Peak2 | 12.185               | 5997.3       |

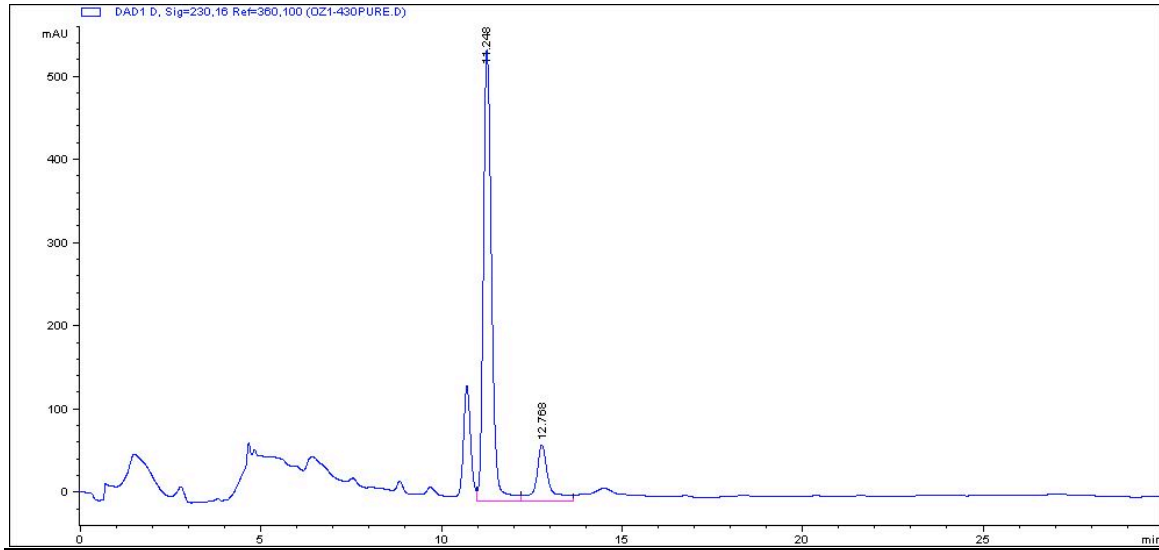

|       | Retention Time (min) | Area (mAu*s) |
|-------|----------------------|--------------|
| Peak1 | 11.248               | 8665.3       |
| Peak2 | 12.768               | 1749.6       |

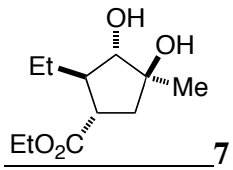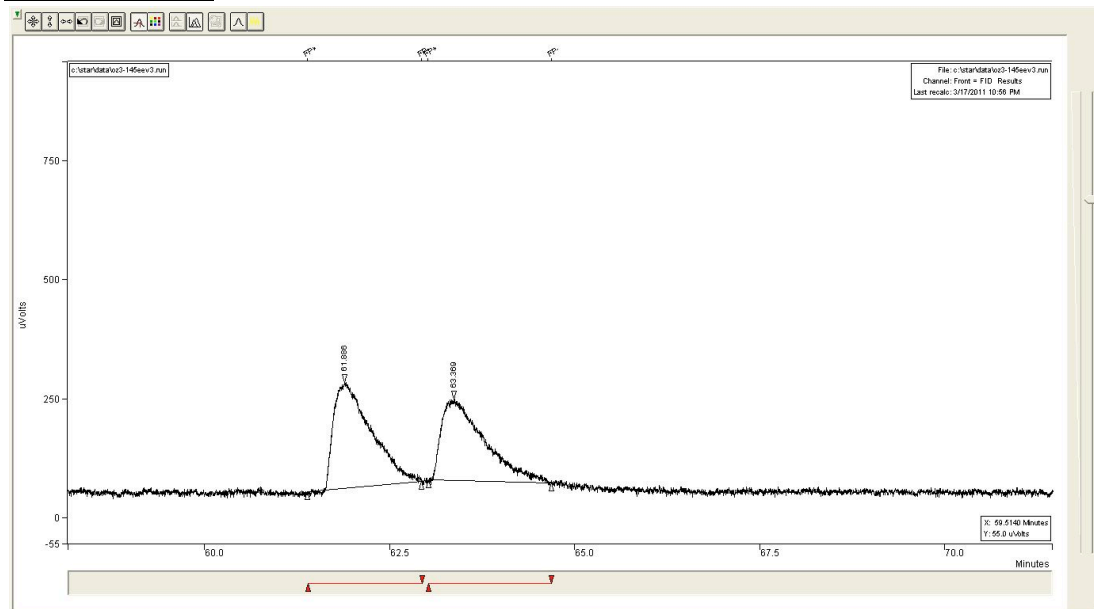

|       | Retention Time (min) | Area (mVolts*s) |
|-------|----------------------|-----------------|
| Peak1 | 61.886               | 0.78            |
| Peak2 | 63.369               | 0.72            |

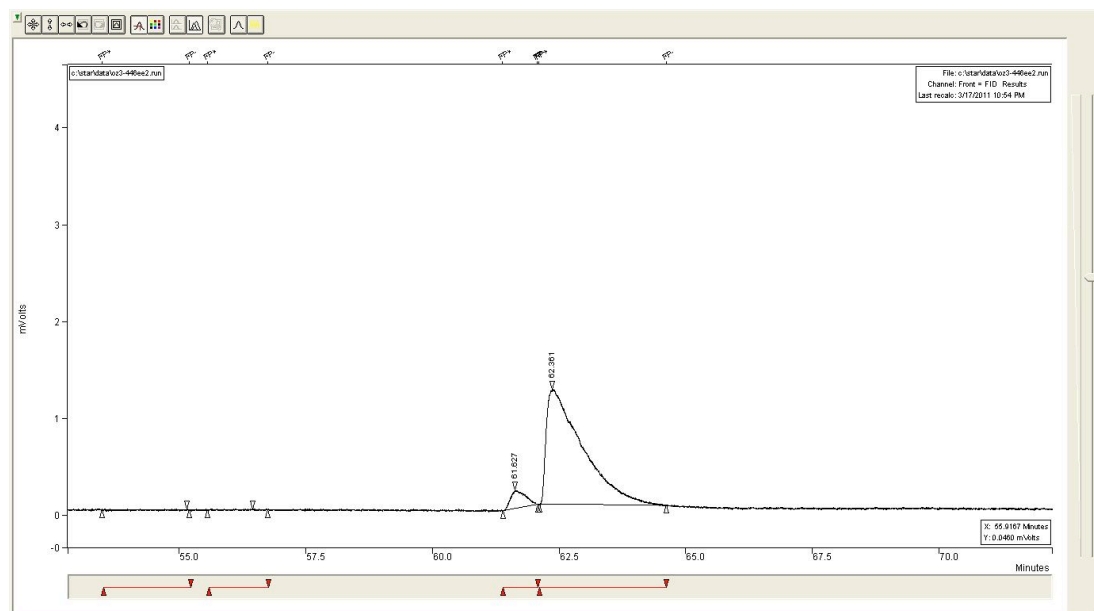

|       | Retention Time (min) | Area (mVolts*s) |
|-------|----------------------|-----------------|
| Peak1 | 61.627               | 3.78            |
| Peak2 | 62.361               | 59              |

## X-Ray Crystal Structure and Data

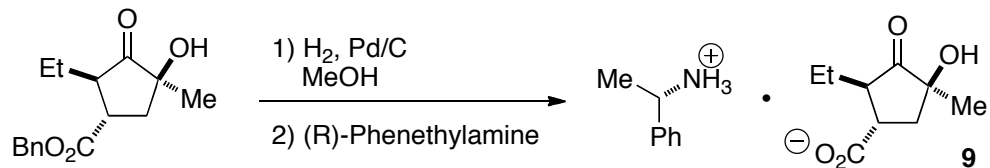

Procedure:

**4i** was combined with 10% Palladium on Carbon (10 wt%) and suspended in dry methanol. An atmosphere (1 atm) of H<sub>2</sub> was introduced via balloon and stirred at room temperature overnight. The reaction was filtered through a plug of celite and concentrated to an oil. This crude oil was then dissolved in DCM and the amine (1 equiv.) was added. The reaction was concentrated and the product was recrystallized by slow evaporation from methanol.

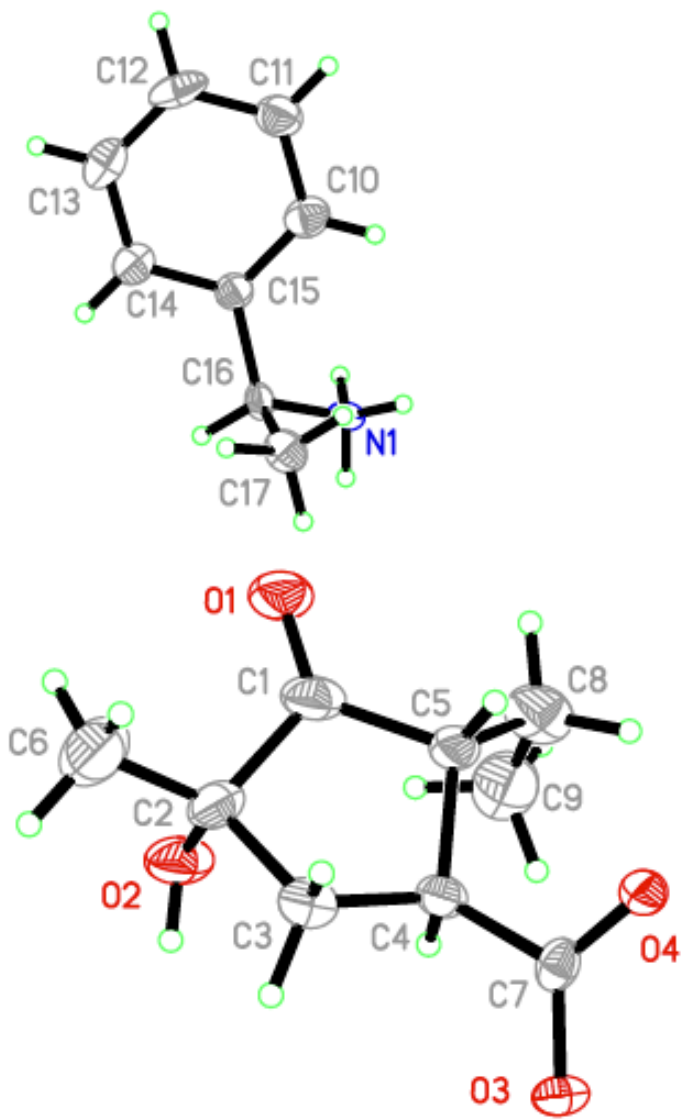

\_Table 1. Crystal data and structure refinement for Rovis99\_0m.

|                                   |                                                             |          |
|-----------------------------------|-------------------------------------------------------------|----------|
| Identification code               | rovis99_0m                                                  |          |
| Empirical formula                 | C <sub>17</sub> H <sub>25</sub> NO <sub>4</sub>             |          |
| Formula weight                    | 307.38                                                      |          |
| Temperature                       | 120 K                                                       |          |
| Wavelength                        | 0.71073 Å                                                   |          |
| Crystal system                    | Orthorhombic                                                |          |
| Space group                       | P2 <sub>1</sub> 2 <sub>1</sub> 2 <sub>1</sub>               |          |
| Unit cell dimensions              | <i>a</i> = 6.1775(5) Å                                      | α = 90°. |
|                                   | <i>b</i> = 13.7872(10) Å                                    | β = 90°. |
|                                   | <i>c</i> = 19.8051(14) Å                                    | γ = 90°. |
| Volume                            | 1686.8(2) Å <sup>3</sup>                                    |          |
| Z                                 | 4                                                           |          |
| Density (calculated)              | 1.210 Mg/m <sup>3</sup>                                     |          |
| Absorption coefficient            | 0.086 mm <sup>-1</sup>                                      |          |
| F(000)                            | 664                                                         |          |
| Crystal size                      | 0.20 x 0.11 x 0.06 mm <sup>3</sup>                          |          |
| Theta range for data collection   | 1.80 to 24.41°.                                             |          |
| Index ranges                      | -7 ≤ <i>h</i> ≤ 7, -15 ≤ <i>k</i> ≤ 16, -23 ≤ <i>l</i> ≤ 23 |          |
| Reflections collected             | 24929                                                       |          |
| Independent reflections           | 2773 [R(int) = 0.1599]                                      |          |
| Completeness to theta = 24.41°    | 100.0 %                                                     |          |
| Absorption correction             | Semi-empirical from equivalents                             |          |
| Max. and min. transmission        | 0.9950 and 0.9835                                           |          |
| Refinement method                 | Full-matrix least-squares on F <sup>2</sup>                 |          |
| Data / restraints / parameters    | 2773 / 0 / 204                                              |          |
| Goodness-of-fit on F <sup>2</sup> | 1.005                                                       |          |
| Final R indices [I > 2σ(I)]       | R1 = 0.0559, wR2 = 0.1031                                   |          |
| R indices (all data)              | R1 = 0.1341, wR2 = 0.1311                                   |          |
| Absolute structure parameter      | -1(2)                                                       |          |
| Largest diff. peak and hole       | 0.191 and -0.253 e.Å <sup>-3</sup>                          |          |

Table 2. Atomic coordinates ( $\times 10^4$ ) and equivalent isotropic displacement parameters ( $\text{\AA}^2 \times 10^3$ ) for Rovis99\_0m.  $U(\text{eq})$  is defined as one third of the trace of the orthogonalized  $U^{ij}$  tensor.

|       | x        | y       | z       | $U(\text{eq})$ |
|-------|----------|---------|---------|----------------|
| C(1)  | 1189(7)  | 5403(3) | 2272(2) | 36(1)          |
| C(2)  | 2746(7)  | 5442(3) | 1665(2) | 32(1)          |
| C(3)  | 1591(7)  | 4816(3) | 1137(2) | 30(1)          |
| C(4)  | 442(7)   | 4023(3) | 1557(2) | 25(1)          |
| C(5)  | -428(7)  | 4592(3) | 2162(2) | 30(1)          |
| C(6)  | 3355(10) | 6445(3) | 1442(2) | 56(2)          |
| C(7)  | -1185(7) | 3485(3) | 1119(2) | 23(1)          |
| C(8)  | -945(8)  | 4013(4) | 2802(2) | 44(1)          |
| C(9)  | 849(9)   | 3380(3) | 3045(2) | 53(2)          |
| C(10) | 6989(8)  | 4591(3) | 9518(2) | 33(1)          |
| C(11) | 6401(8)  | 5494(3) | 9768(2) | 38(1)          |
| C(12) | 7823(9)  | 6258(3) | 9735(2) | 43(1)          |
| C(13) | 9829(9)  | 6134(4) | 9452(2) | 46(1)          |
| C(14) | 10428(8) | 5231(3) | 9207(2) | 36(1)          |
| C(15) | 9024(7)  | 4455(3) | 9239(2) | 25(1)          |
| C(16) | 9717(6)  | 3510(3) | 8924(2) | 23(1)          |
| C(17) | 8800(7)  | 3376(3) | 8215(2) | 30(1)          |
| N(1)  | 9017(5)  | 2659(2) | 9347(1) | 22(1)          |
| O(1)  | 1297(5)  | 5923(2) | 2760(2) | 47(1)          |
| O(2)  | 4568(5)  | 4940(2) | 1949(2) | 45(1)          |
| O(3)  | -396(4)  | 2840(2) | 731(1)  | 24(1)          |
| O(4)  | -3154(5) | 3710(2) | 1143(1) | 27(1)          |

Table 3. Bond lengths [ $\text{\AA}$ ] and angles [ $^\circ$ ] for Rovis99\_0m.

|                |          |
|----------------|----------|
| C(1)-O(1)      | 1.206(5) |
| C(1)-C(5)      | 1.514(6) |
| C(1)-C(2)      | 1.540(6) |
| C(2)-O(2)      | 1.437(5) |
| C(2)-C(6)      | 1.499(6) |
| C(2)-C(3)      | 1.532(6) |
| C(3)-C(4)      | 1.545(5) |
| C(4)-C(7)      | 1.521(6) |
| C(4)-C(5)      | 1.530(5) |
| C(5)-C(8)      | 1.532(6) |
| C(7)-O(4)      | 1.256(5) |
| C(7)-O(3)      | 1.272(5) |
| C(8)-C(9)      | 1.490(6) |
| C(10)-C(15)    | 1.386(6) |
| C(10)-C(11)    | 1.388(6) |
| C(11)-C(12)    | 1.373(6) |
| C(12)-C(13)    | 1.371(7) |
| C(13)-C(14)    | 1.387(6) |
| C(14)-C(15)    | 1.379(5) |
| C(15)-C(16)    | 1.506(5) |
| C(16)-N(1)     | 1.505(4) |
| C(16)-C(17)    | 1.526(5) |
| O(1)-C(1)-C(5) | 126.2(4) |
| O(1)-C(1)-C(2) | 124.8(4) |
| C(5)-C(1)-C(2) | 109.0(4) |
| O(2)-C(2)-C(6) | 111.3(4) |
| O(2)-C(2)-C(3) | 111.1(3) |
| C(6)-C(2)-C(3) | 115.9(4) |
| O(2)-C(2)-C(1) | 99.6(3)  |
| C(6)-C(2)-C(1) | 114.8(4) |
| C(3)-C(2)-C(1) | 102.8(4) |
| C(2)-C(3)-C(4) | 104.2(3) |
| C(7)-C(4)-C(5) | 117.7(4) |

|                   |          |
|-------------------|----------|
| C(7)-C(4)-C(3)    | 110.0(3) |
| C(5)-C(4)-C(3)    | 102.7(3) |
| C(1)-C(5)-C(4)    | 105.0(4) |
| C(1)-C(5)-C(8)    | 113.8(4) |
| C(4)-C(5)-C(8)    | 117.0(4) |
| O(4)-C(7)-O(3)    | 124.5(4) |
| O(4)-C(7)-C(4)    | 119.9(4) |
| O(3)-C(7)-C(4)    | 115.6(4) |
| C(9)-C(8)-C(5)    | 114.7(4) |
| C(15)-C(10)-C(11) | 120.1(5) |
| C(12)-C(11)-C(10) | 120.3(5) |
| C(13)-C(12)-C(11) | 120.2(4) |
| C(12)-C(13)-C(14) | 119.7(5) |
| C(15)-C(14)-C(13) | 120.9(4) |
| C(14)-C(15)-C(10) | 118.9(4) |
| C(14)-C(15)-C(16) | 118.3(4) |
| C(10)-C(15)-C(16) | 122.7(4) |
| N(1)-C(16)-C(15)  | 111.3(3) |
| N(1)-C(16)-C(17)  | 108.1(3) |
| C(15)-C(16)-C(17) | 112.3(3) |

---

Symmetry transformations used to generate equivalent atoms:



Table 4. Anisotropic displacement parameters ( $\text{\AA}^2 \times 10^3$ ) for Rovis99\_0m. The anisotropic displacement factor exponent takes the form:  $-2\pi^2 [ h^2 a^{*2} U^{11} + \dots + 2 h k a^* b^* U^{12} ]$

|       | U <sup>11</sup> | U <sup>22</sup> | U <sup>33</sup> | U <sup>23</sup> | U <sup>13</sup> | U <sup>12</sup> |
|-------|-----------------|-----------------|-----------------|-----------------|-----------------|-----------------|
| C(1)  | 28(3)           | 40(3)           | 40(3)           | -14(3)          | -1(2)           | 12(3)           |
| C(2)  | 30(3)           | 26(3)           | 39(3)           | -10(2)          | -5(2)           | 2(2)            |
| C(3)  | 31(3)           | 33(3)           | 28(2)           | -2(2)           | 1(2)            | 5(2)            |
| C(4)  | 22(3)           | 29(3)           | 24(2)           | -6(2)           | 2(2)            | 3(2)            |
| C(5)  | 22(3)           | 36(3)           | 33(3)           | -15(2)          | 1(2)            | -1(2)           |
| C(6)  | 79(4)           | 40(3)           | 50(3)           | -7(3)           | 8(3)            | -15(3)          |
| C(7)  | 28(3)           | 21(3)           | 19(2)           | 3(2)            | -2(2)           | -7(2)           |
| C(8)  | 43(3)           | 64(4)           | 25(3)           | -10(2)          | -3(2)           | 1(3)            |
| C(9)  | 65(4)           | 57(4)           | 37(3)           | 0(3)            | 1(3)            | -10(3)          |
| C(10) | 39(3)           | 26(3)           | 33(3)           | 4(2)            | -1(2)           | 3(3)            |
| C(11) | 42(3)           | 35(3)           | 38(3)           | 1(2)            | 11(3)           | 4(3)            |
| C(12) | 66(4)           | 20(3)           | 43(3)           | -3(2)           | -4(3)           | 12(3)           |
| C(13) | 52(4)           | 29(3)           | 58(3)           | -1(3)           | 2(3)            | -10(3)          |
| C(14) | 40(3)           | 29(3)           | 39(3)           | -4(2)           | 4(2)            | -4(3)           |
| C(15) | 26(3)           | 22(3)           | 27(2)           | 2(2)            | 0(2)            | 2(2)            |
| C(16) | 19(2)           | 22(2)           | 29(2)           | 3(2)            | 4(2)            | -4(2)           |
| C(17) | 35(3)           | 36(3)           | 20(2)           | 5(2)            | 4(2)            | -1(2)           |
| N(1)  | 23(2)           | 22(2)           | 21(2)           | -4(2)           | 3(2)            | 4(2)            |
| O(1)  | 34(2)           | 57(2)           | 49(2)           | -32(2)          | 2(2)            | -2(2)           |
| O(2)  | 27(2)           | 54(2)           | 54(2)           | -29(2)          | -7(2)           | 8(2)            |
| O(3)  | 26(2)           | 24(2)           | 23(2)           | -8(1)           | -2(1)           | 6(2)            |
| O(4)  | 19(2)           | 27(2)           | 34(2)           | -10(1)          | 1(1)            | 0(2)            |

Table 5. Hydrogen coordinates ( $\times 10^4$ ) and isotropic displacement parameters ( $\text{\AA}^2 \times 10^3$ ) for Rovis99\_0m.

|        | x     | y    | z    | U(eq) |
|--------|-------|------|------|-------|
| H(3A)  | 2622  | 4530 | 826  | 36    |
| H(3B)  | 551   | 5196 | 884  | 36    |
| H(4)   | 1530  | 3560 | 1718 | 30    |
| H(5)   | -1783 | 4897 | 2017 | 36    |
| H(6A)  | 4503  | 6407 | 1117 | 84    |
| H(6B)  | 3831  | 6814 | 1826 | 84    |
| H(6C)  | 2121  | 6755 | 1242 | 84    |
| H(8A)  | -1322 | 4464 | 3159 | 53    |
| H(8B)  | -2204 | 3611 | 2716 | 53    |
| H(9A)  | 2190  | 3732 | 3026 | 80    |
| H(9B)  | 945   | 2815 | 2763 | 80    |
| H(9C)  | 570   | 3187 | 3502 | 80    |
| H(10)  | 6017  | 4077 | 9539 | 39    |
| H(11)  | 5038  | 5582 | 9958 | 46    |
| H(12)  | 7424  | 6861 | 9905 | 51    |
| H(13)  | 10785 | 6654 | 9424 | 56    |
| H(14)  | 11796 | 5148 | 9019 | 43    |
| H(16)  | 11301 | 3505 | 8895 | 28    |
| H(17A) | 7248  | 3403 | 8233 | 46    |
| H(17B) | 9245  | 2759 | 8040 | 46    |
| H(17C) | 9329  | 3883 | 7927 | 46    |
| H(1A)  | 7626  | 2533 | 9269 | 33    |
| H(1B)  | 9201  | 2798 | 9782 | 33    |
| H(1C)  | 9809  | 2142 | 9239 | 33    |
| H(2)   | 5129  | 4598 | 1659 | 67    |

## NMR Studies

### Procedure:

In a 1 dram vial, 25 mg of **8** (0.12 mmol) was combined with 9 mg of **6** (0.2 equiv, 0.02 mmol), 2 mg of NaOAc (0.2 equiv., 0.02 mmol), and 7 mg trimethoxybenzene (internal standard, 0.3 equiv., 0.04 mmol). This mixture was taken up in CDCl<sub>3</sub> and transferred to an NMR tube. The tube was heated in an oil bath at 60 °C. Spectra was taken at intervals throughout the reaction.

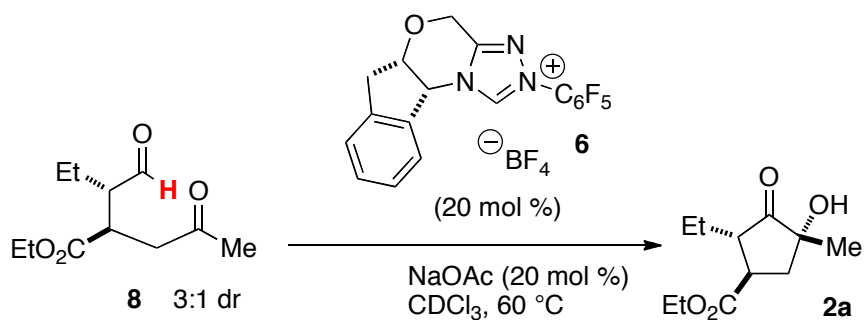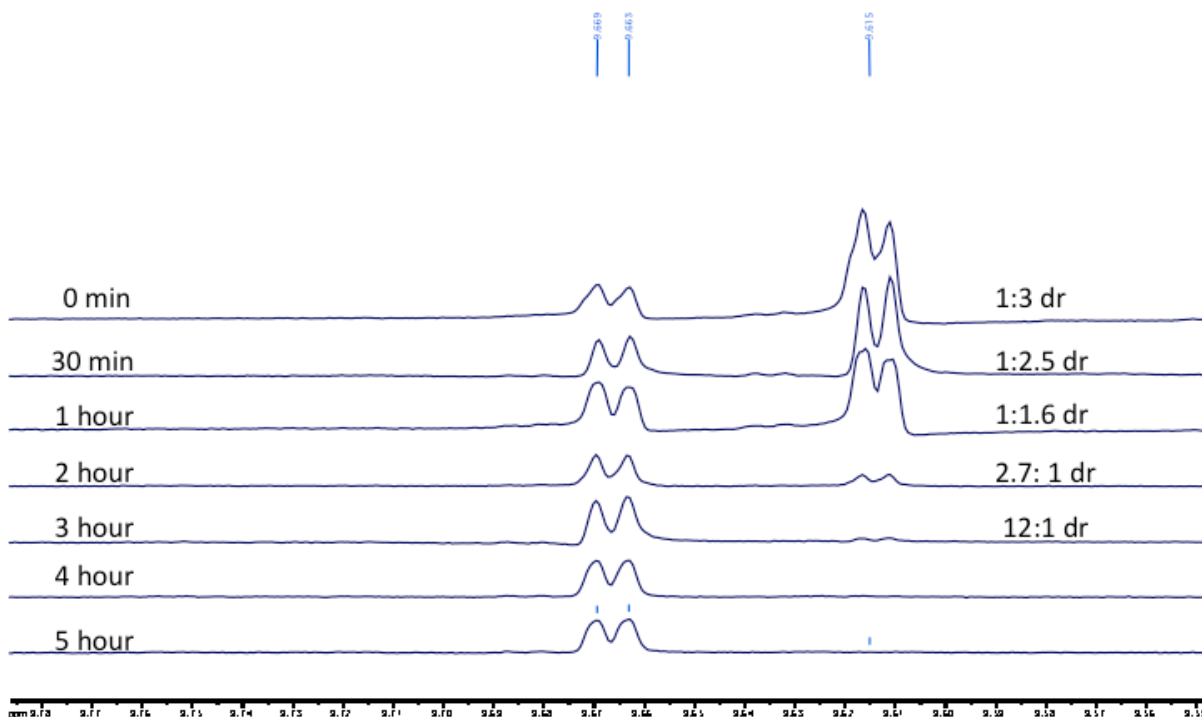

After 5 hours, 6.5 mg of **3** (0.2 equiv., 0.02 mmol) was added and continued heating.

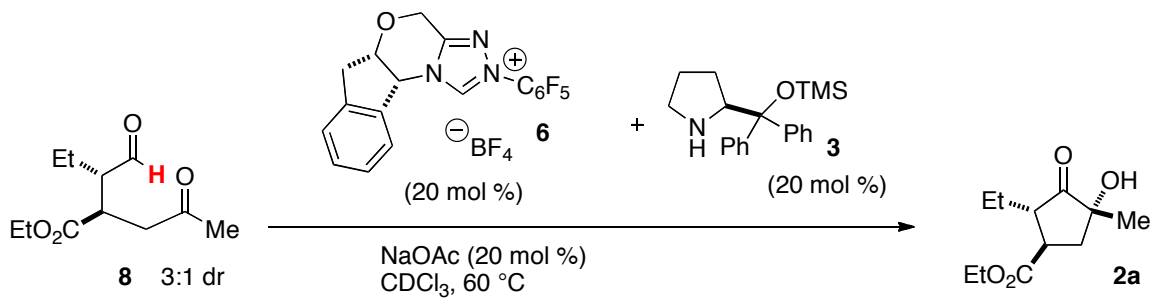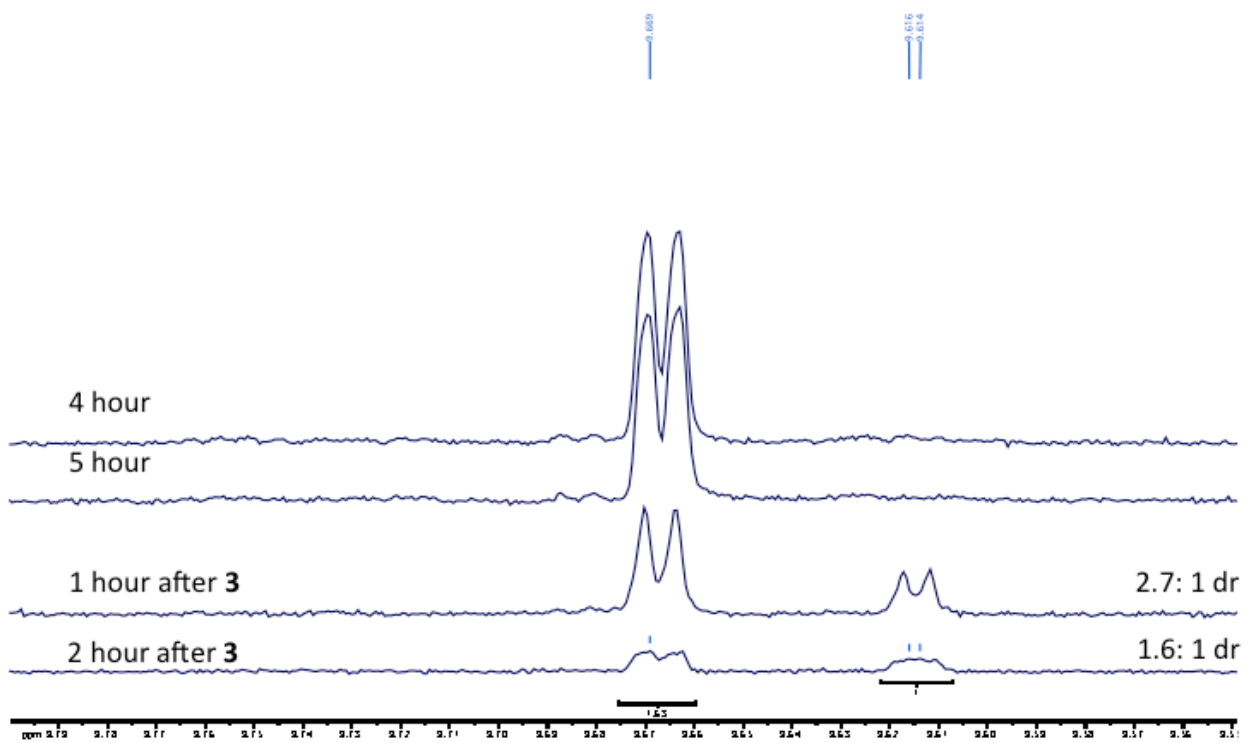

This experiment was repeated, but with amine catalyst **3** present from the beginning.

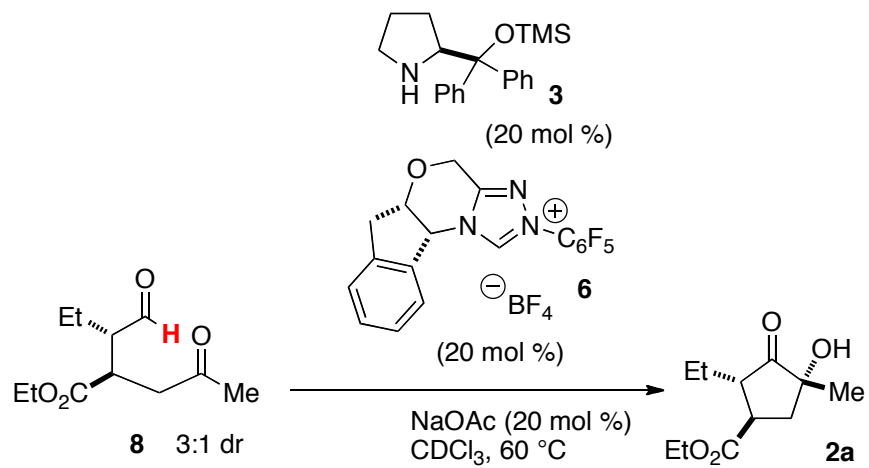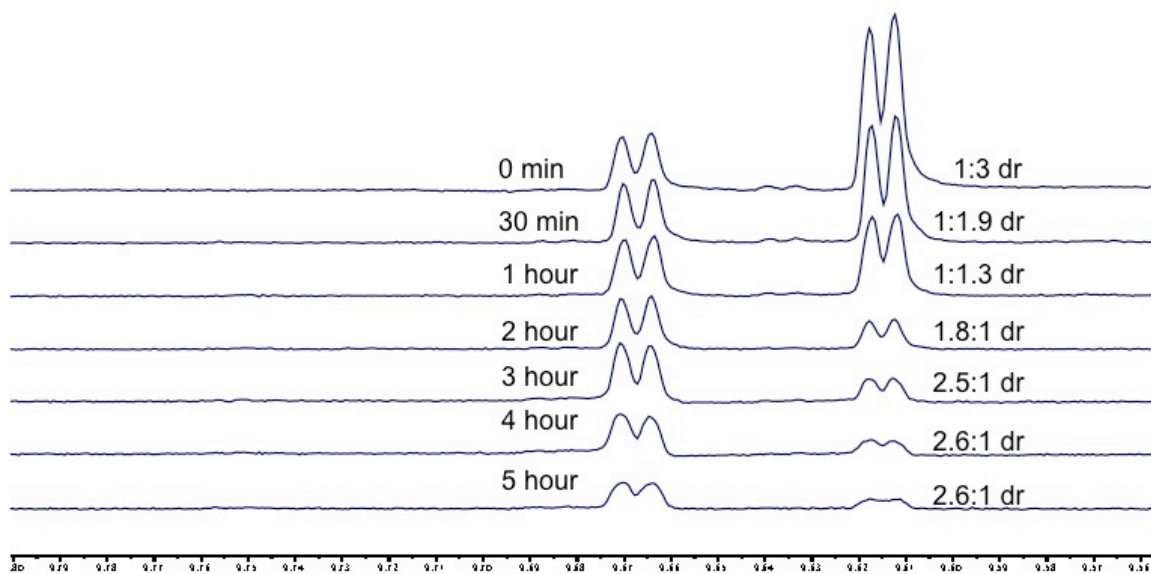

## Crossover Experiments

To determine if a retro-Michael was responsible for low diastereoselectivity, a crossover experiment was conducted by heating the intermediate aldehyde with a different aldehyde starting material in the presence of the amine catalyst. No crossover product was observed, indicating that the amine catalyst is not responsible for this pathway.

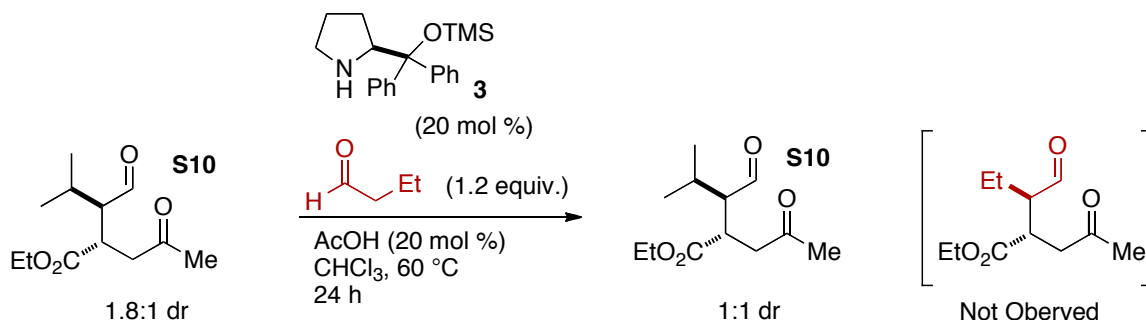

To determine if the NHC catalyst played a role in the retro-Michael, compound **S11** was exposed catalyst **6**, base, and heat for one day. If the retro-Michael occurred, we would expect formation of starting material **2**. None was observed. Note that the combination of the isopropylketone with bulky catalyst **6** does not provide the benzoin product.

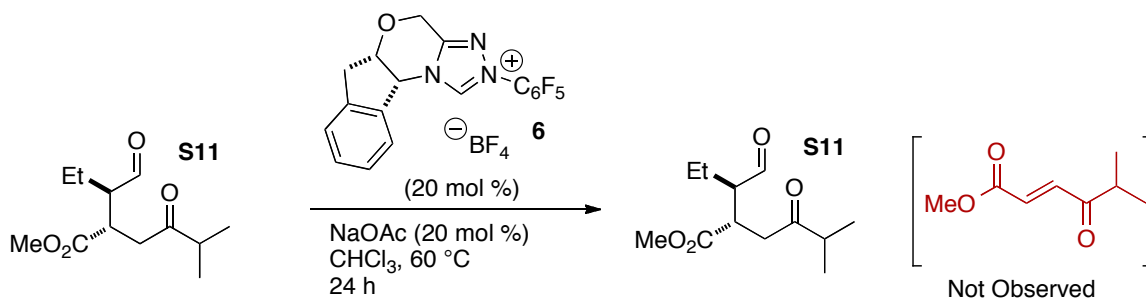

In case the combination of the amine catalyst and the NHC catalyst was responsible, S11 was exposed to both catalysts, isovaleraldehyde, and heat for 1 day. No crossover product was observed.

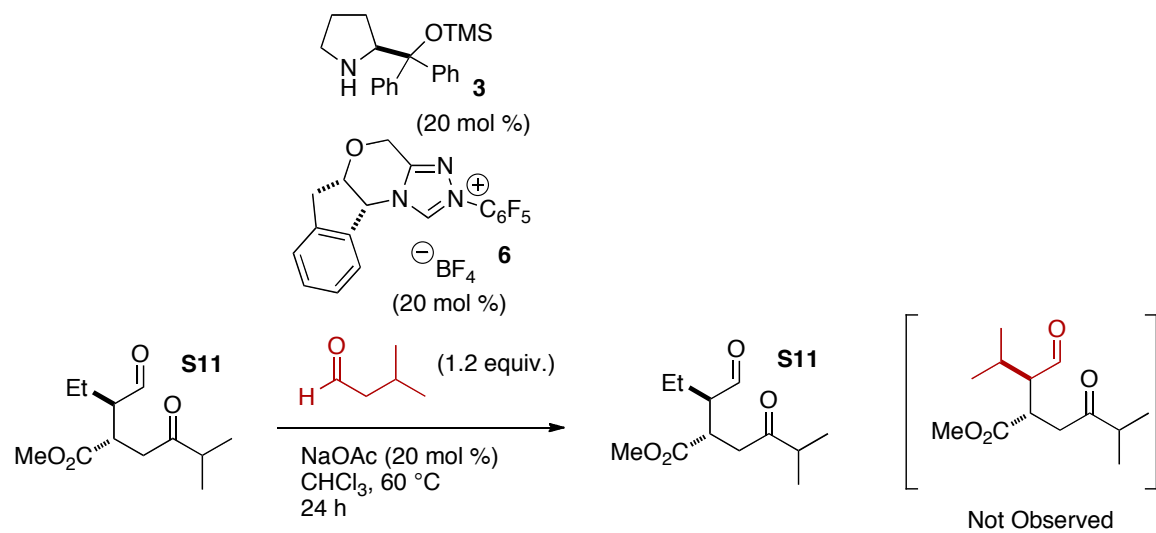

From these results, we are confident that a retro-Michael is not a factor in this new cascade reaction.
